# Supplementary material for: A practical route for the highly stereoselective synthesis of tetrasubstituted fluoroalkenes
Source: Royal Society of Chemistry journal article supplement (doi:10.1039/c3ob42093k), 2013-11-05

## Supporting Information

### A Practical Route for the highly Stereoselective Synthesis of Tetrasubstituted Fluoroalkenes

Chun-Ru Cao, Song Ou, Min Jiang and Jin-Tao Liu\*

*Key Laboratory of Organofluorine Chemistry, Shanghai Institute of Organic Chemistry,  
Chinese Academy of Sciences, 345 Lingling Lu, Shanghai 200032, China*

[jtliu@sioc.ac.cn](mailto:jtliu@sioc.ac.cn)

#### Contents

|                                      |     |
|--------------------------------------|-----|
| Spectra copies of <b>3</b>           | S2  |
| Spectra copies of <b>5</b>           | S26 |
| Copies of HOSEY                      | S44 |
| Crude spectrum of decomposed product | S46 |

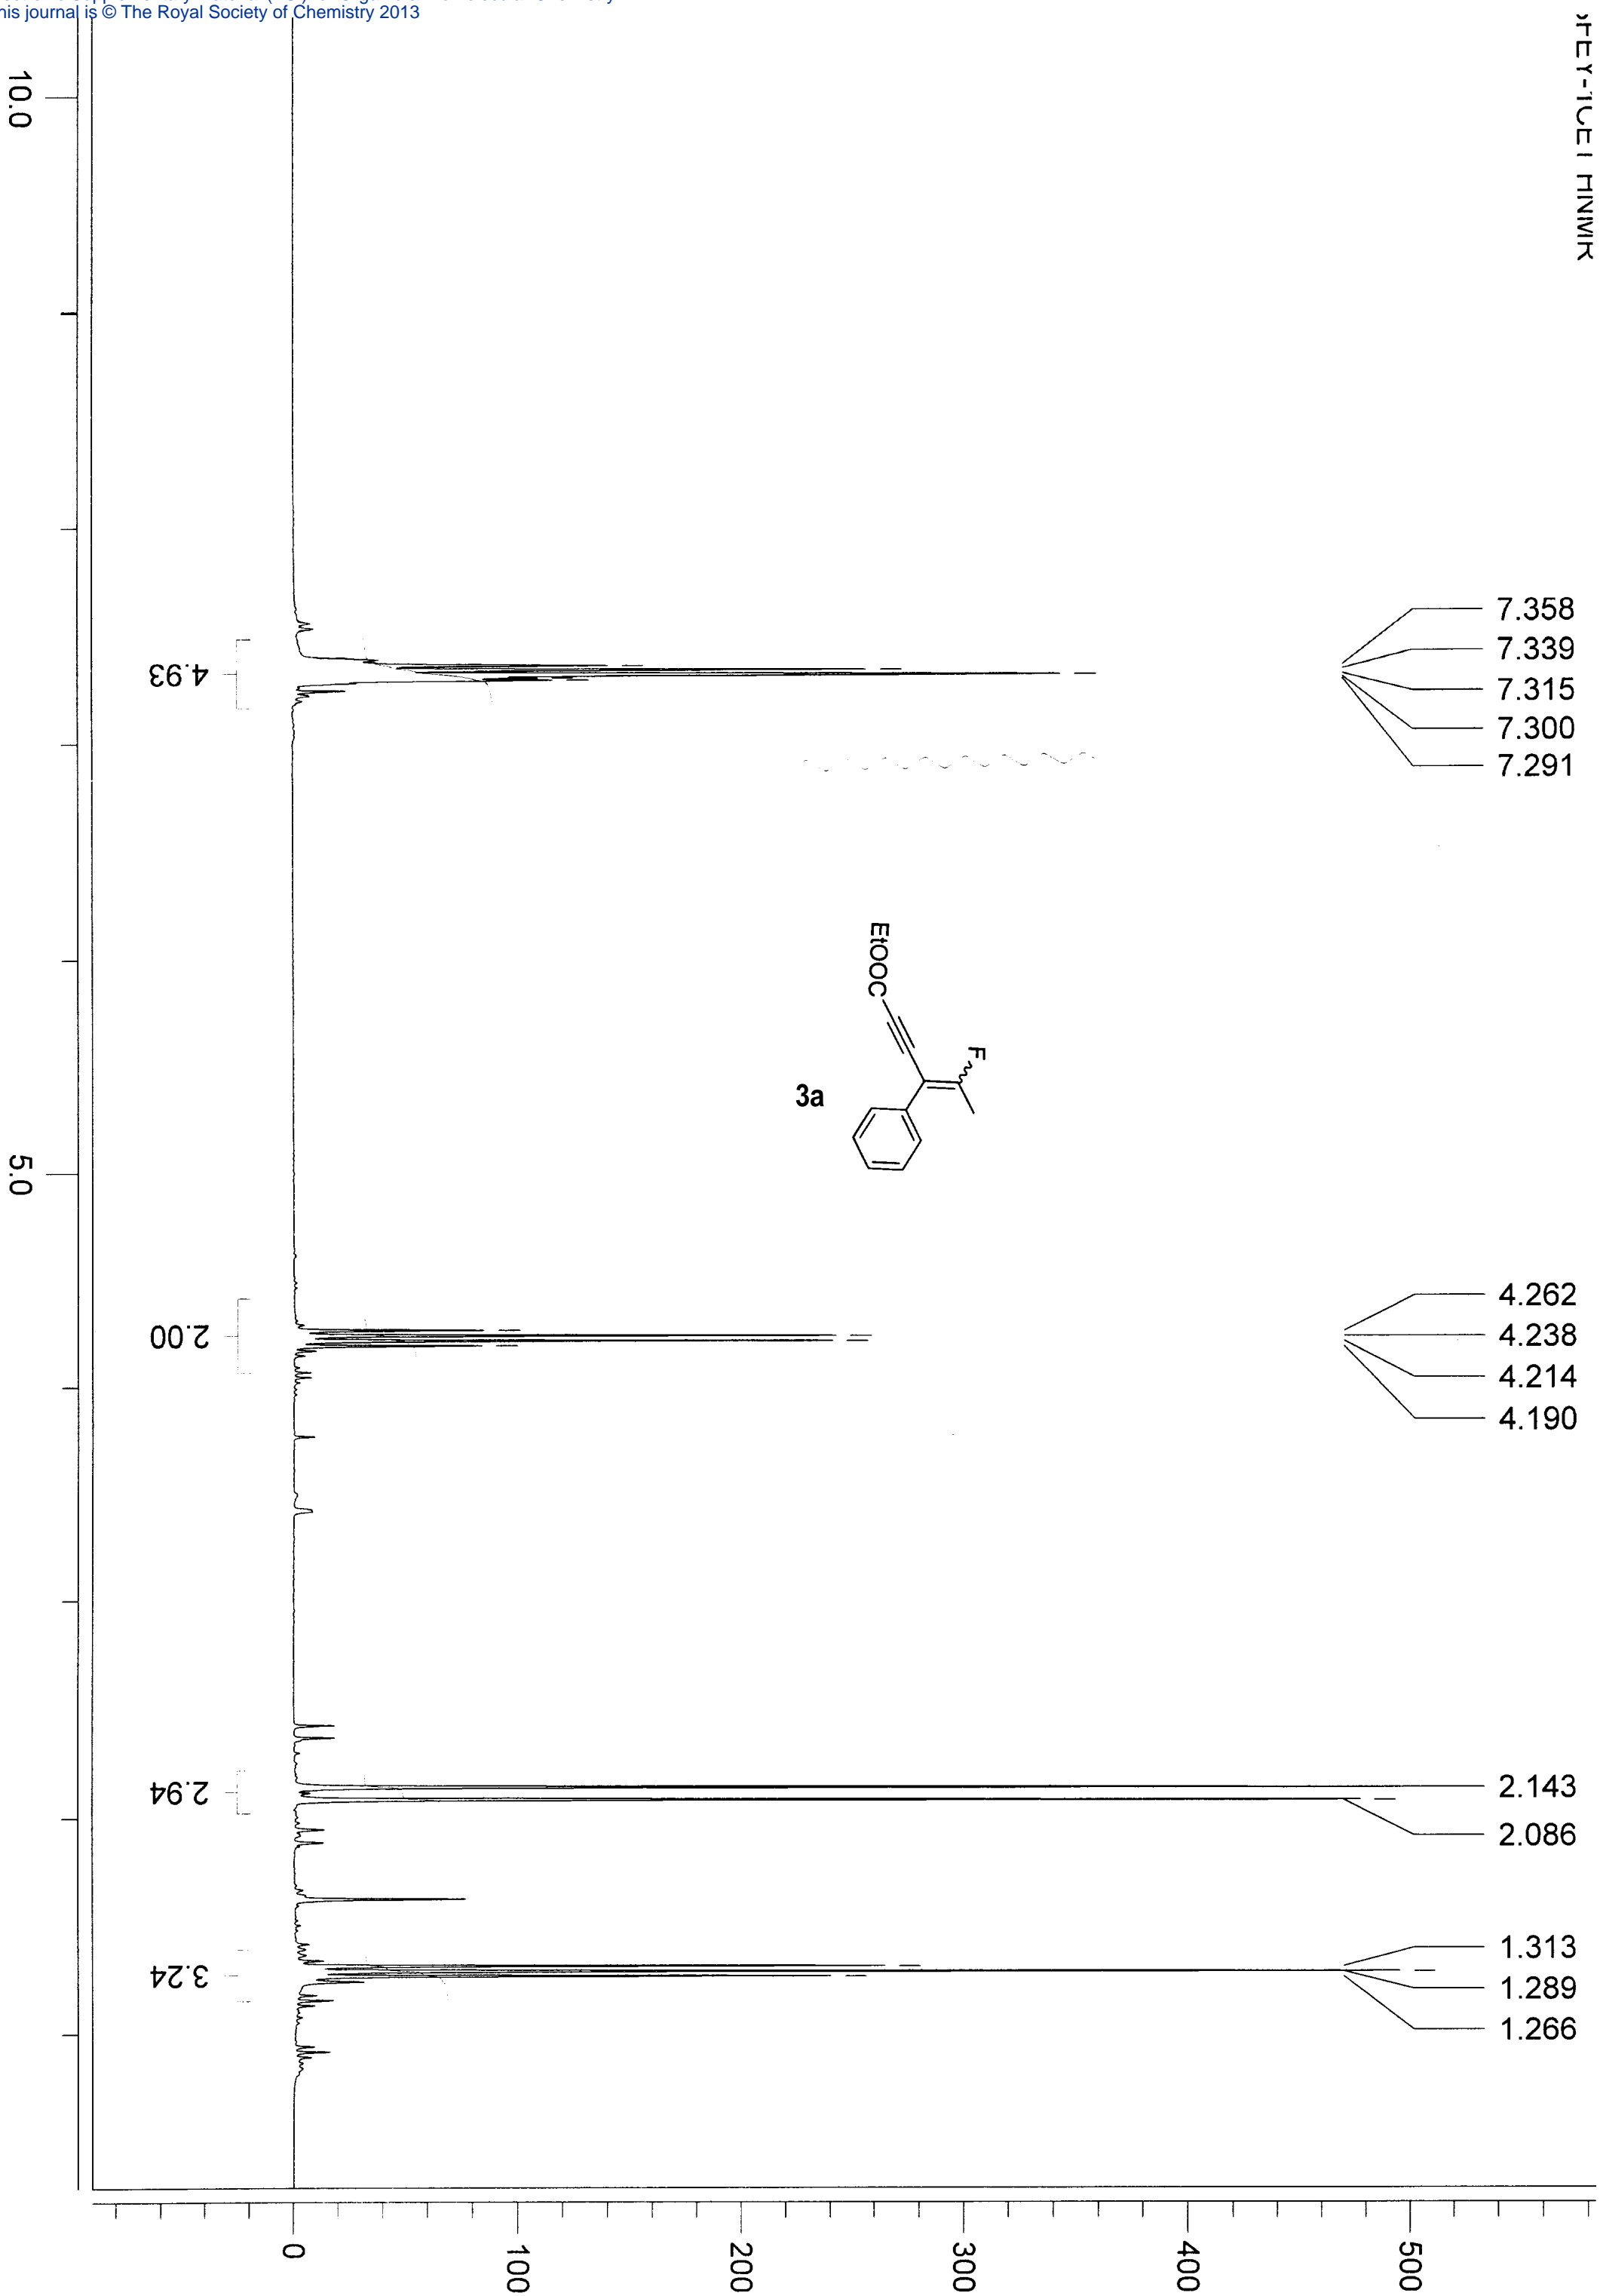

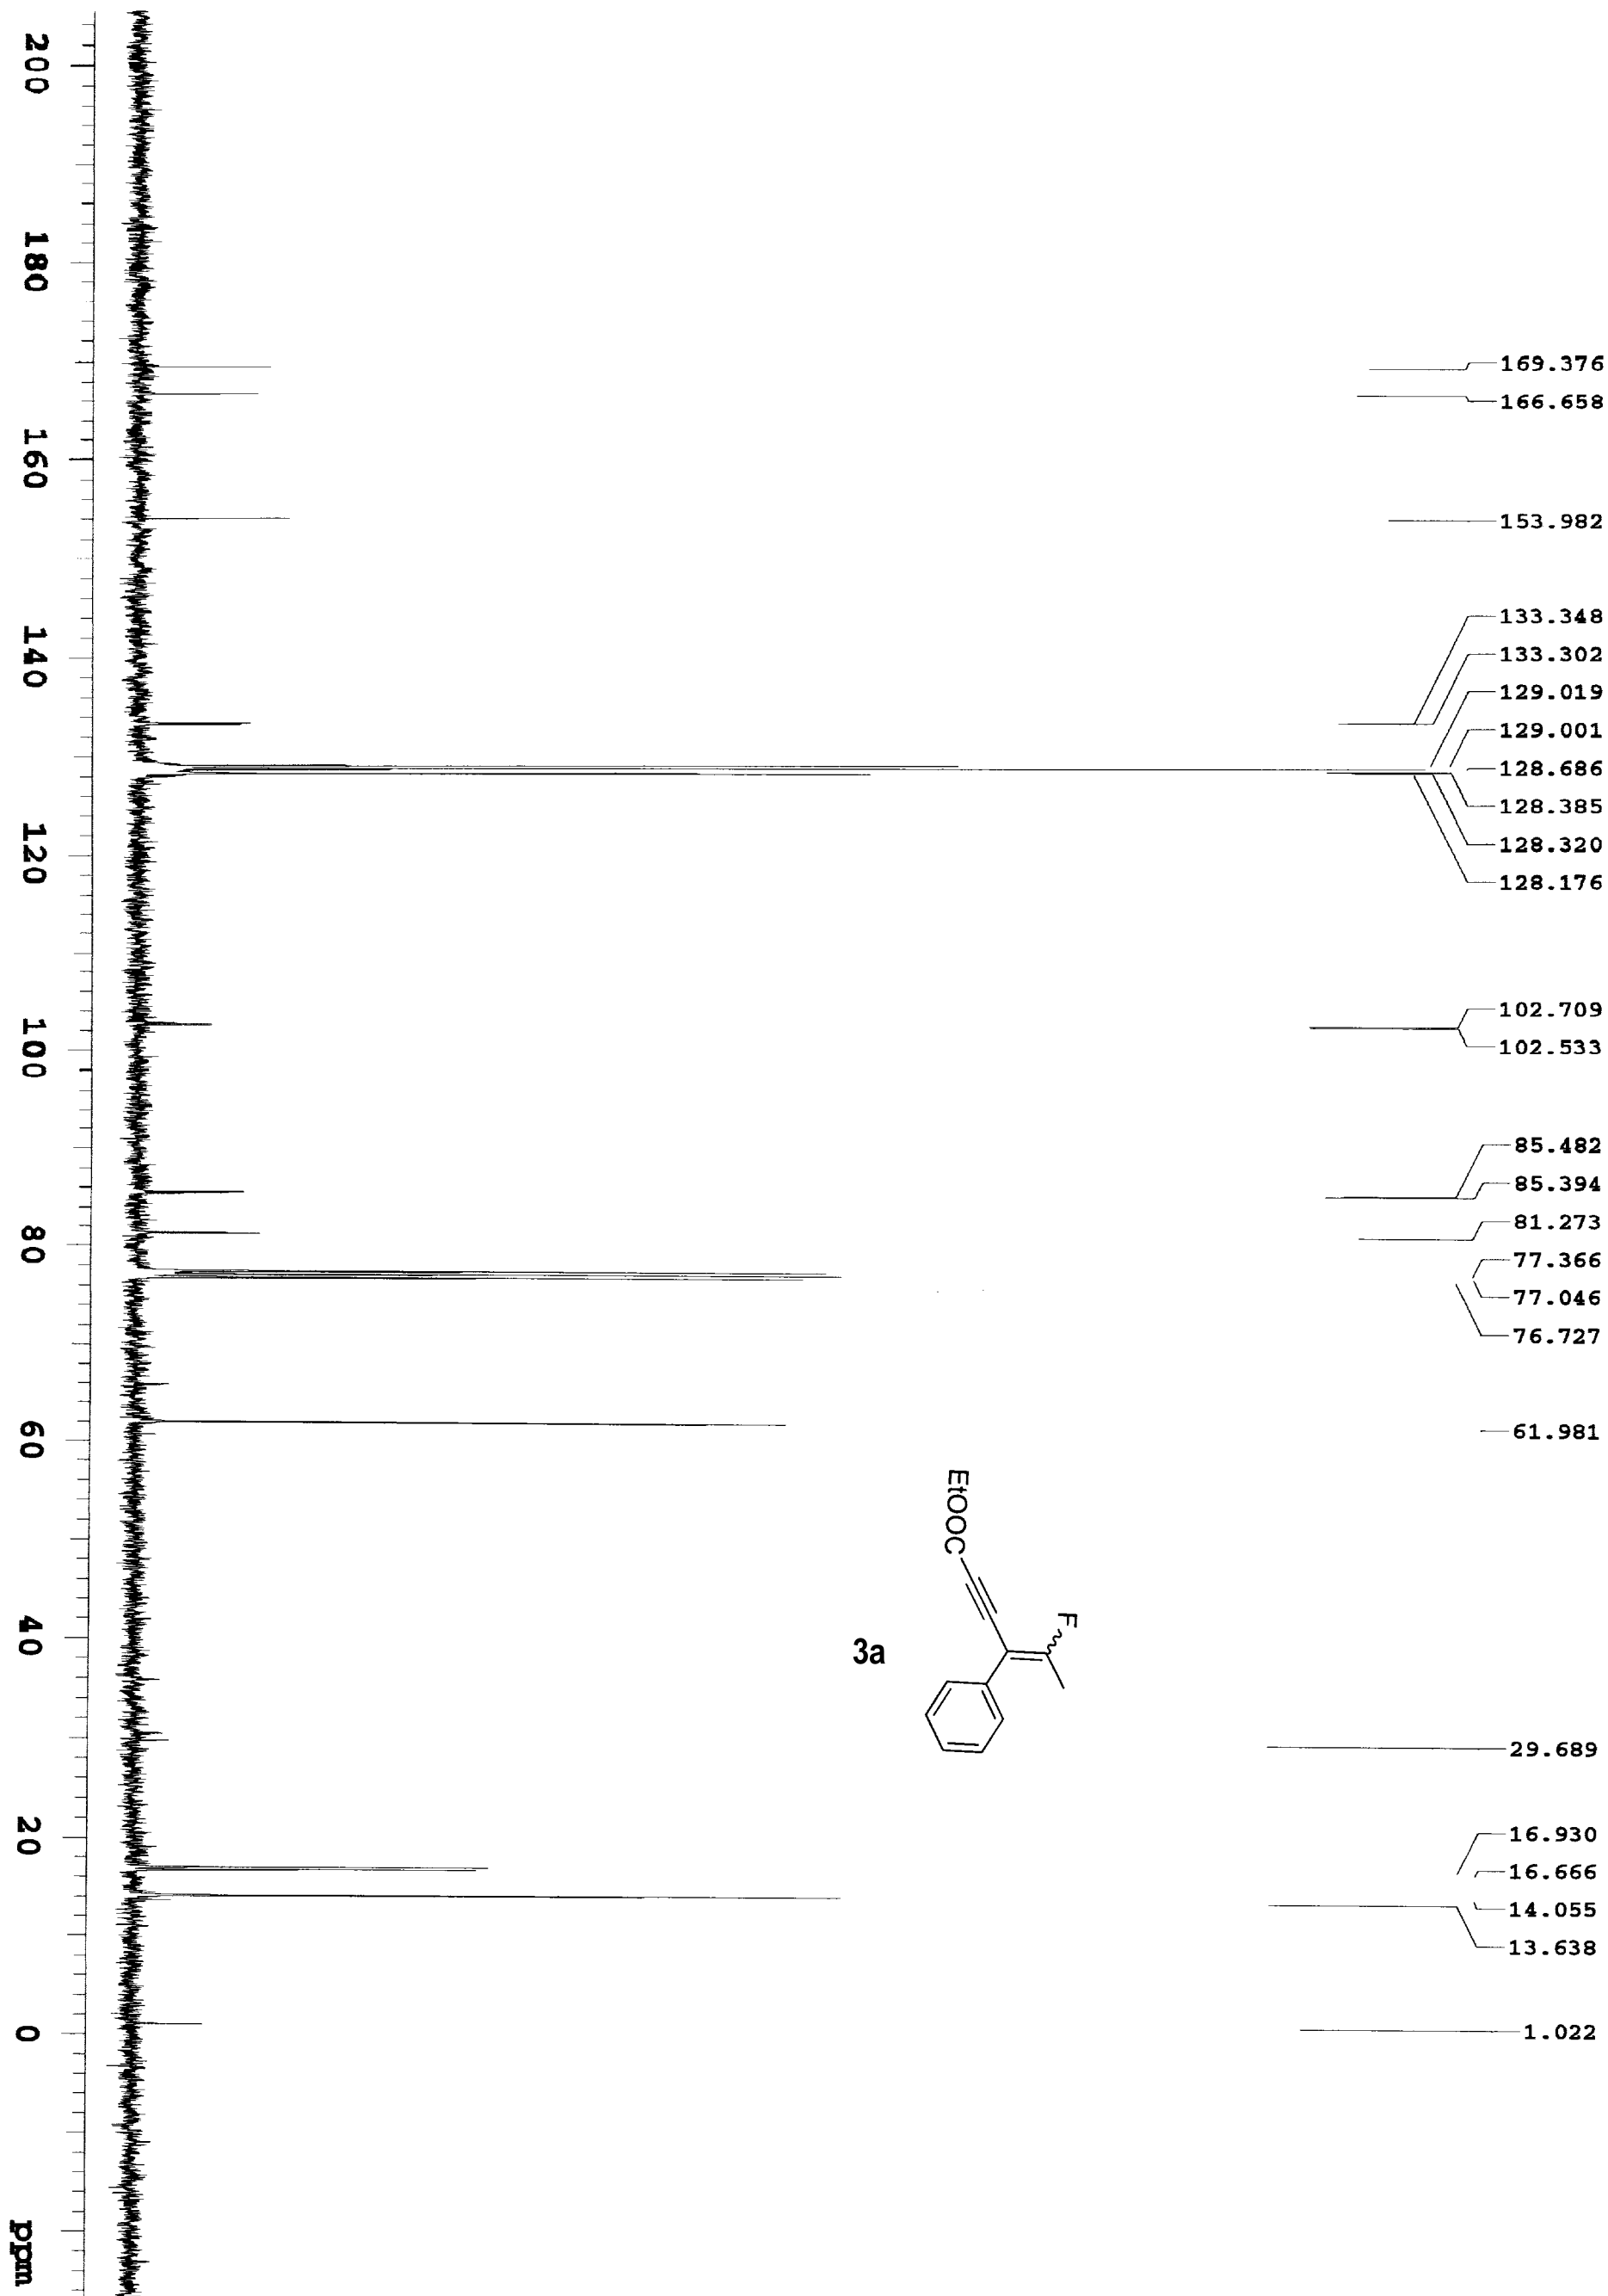

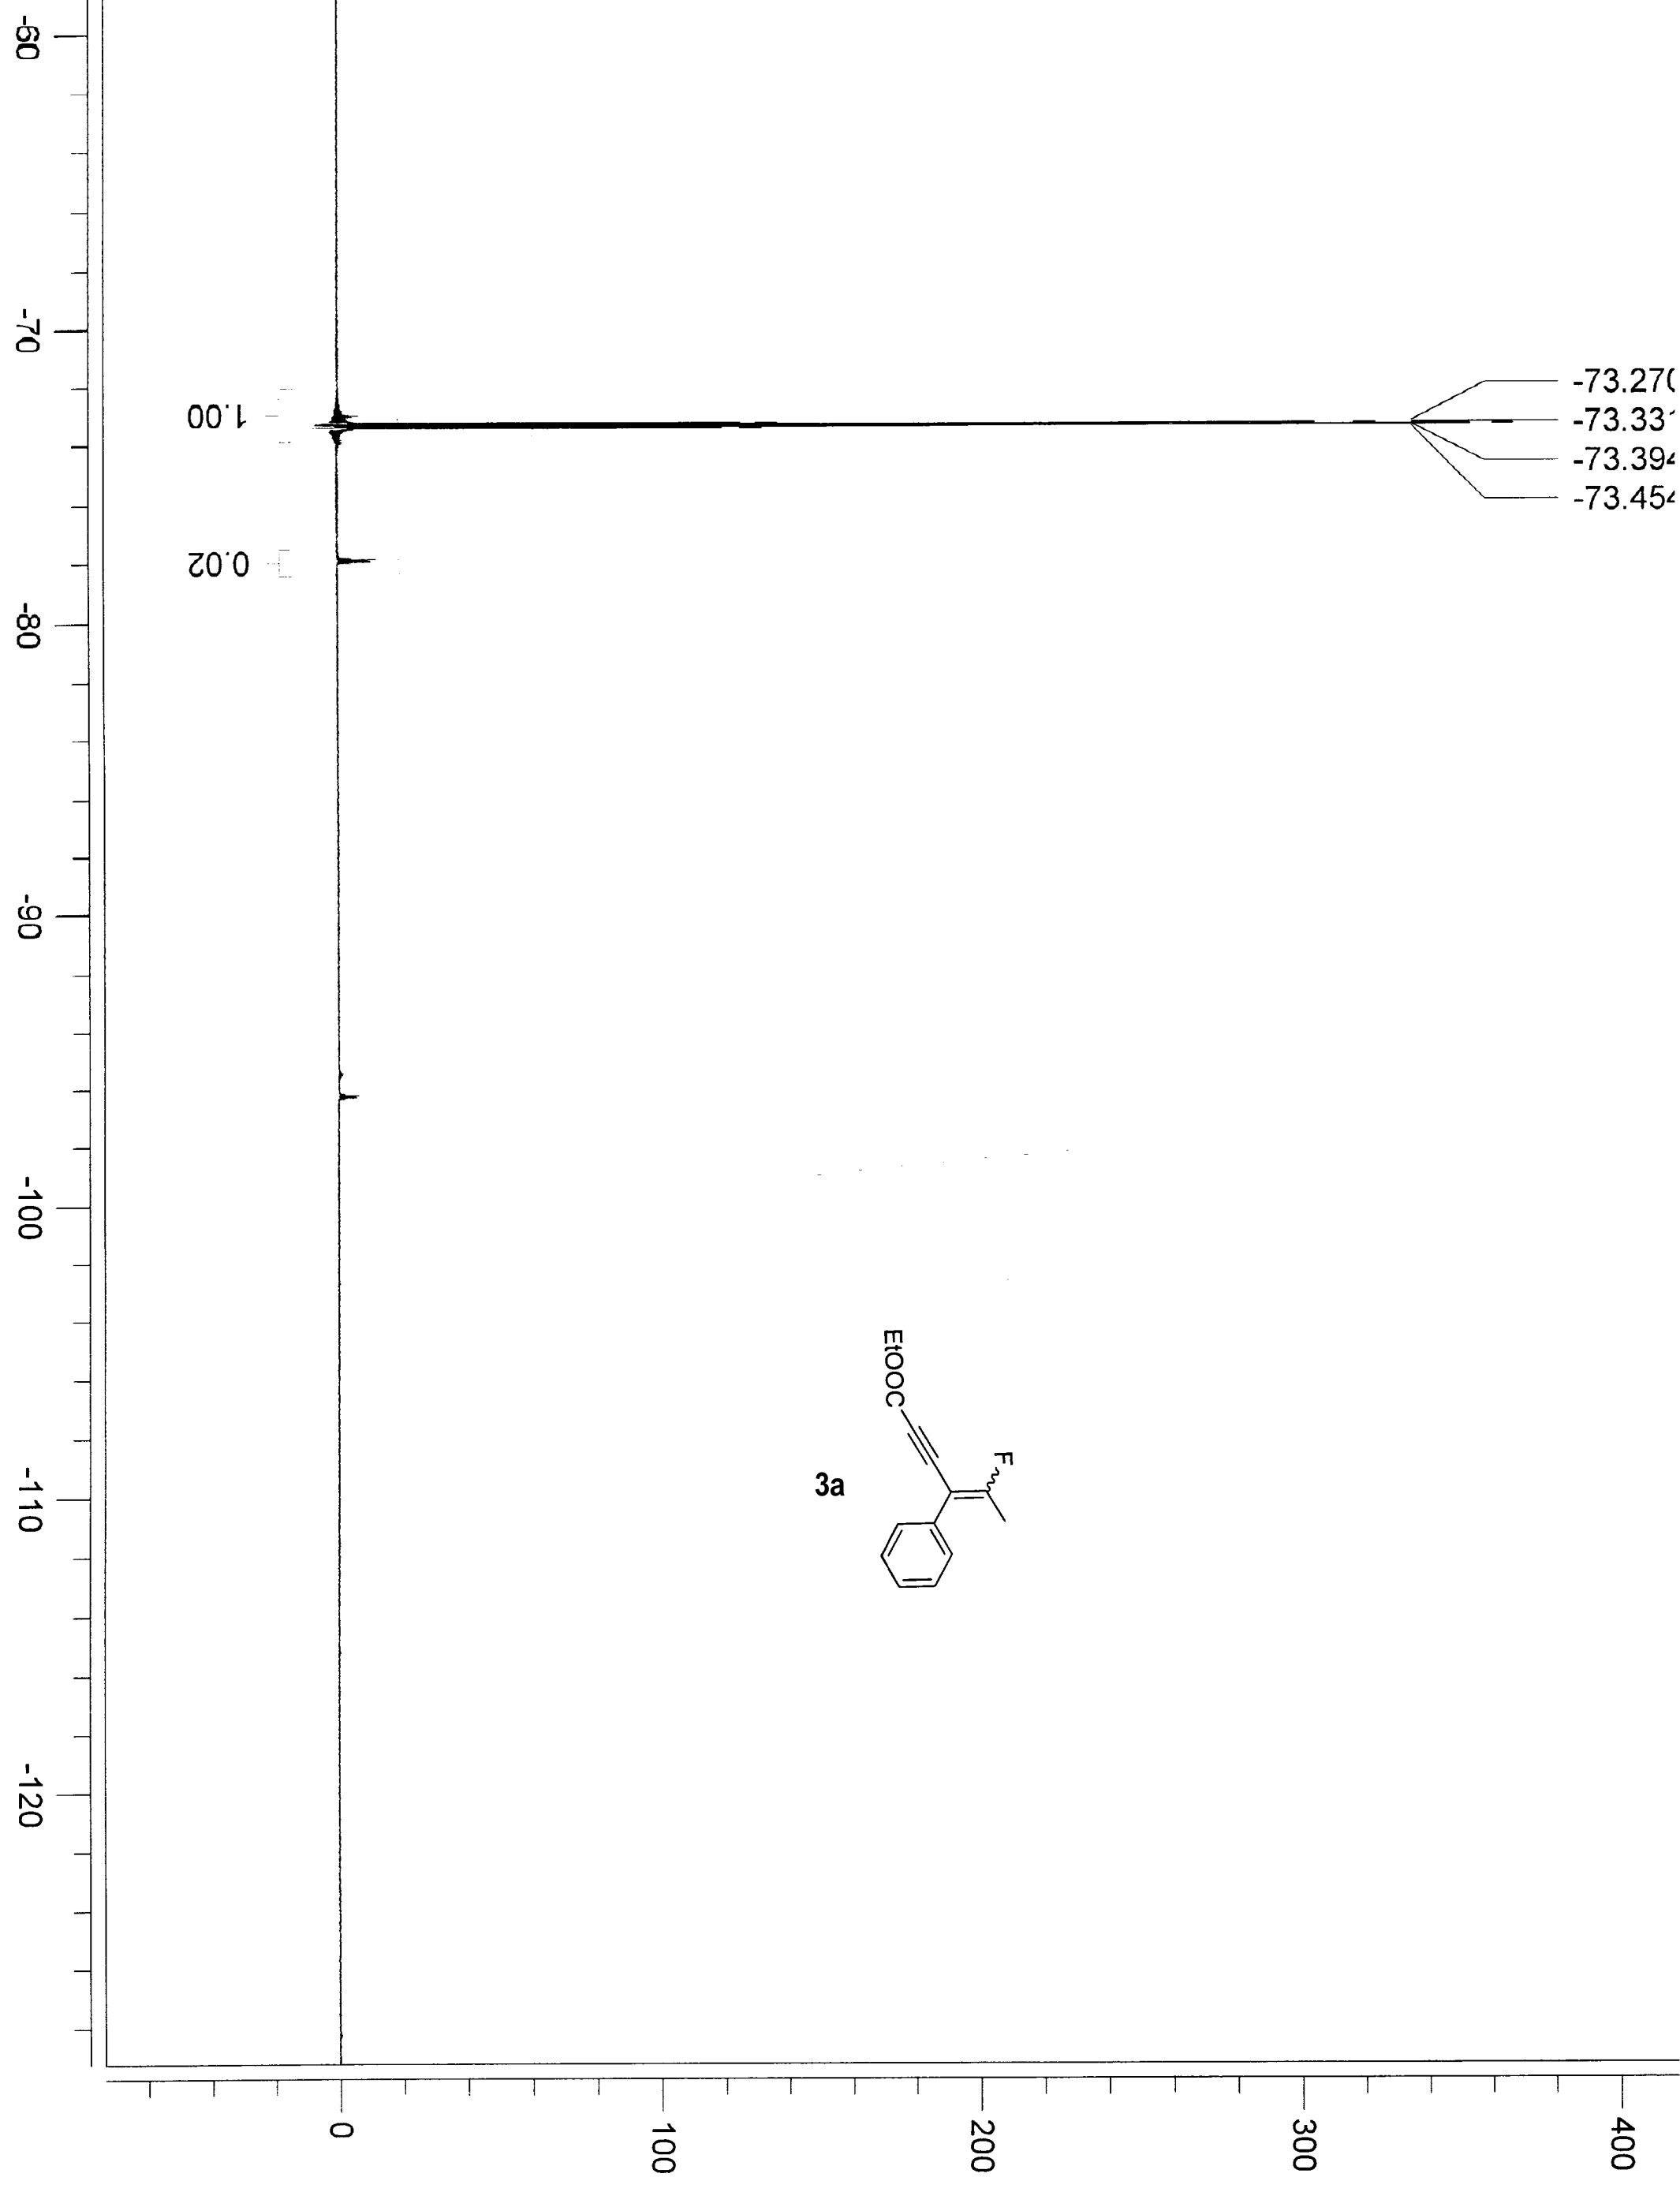

7.325  
7.313  
7.267  
7.253

2.465  
2.443  
2.420  
2.353  
2.341  
2.297  
2.285  
1.640  
1.630  
1.614  
1.607  
1.591  
1.568  
1.539  
1.515  
1.499  
1.489  
1.475  
1.465  
1.443  
1.267  
0.989  
0.976  
0.965

3b

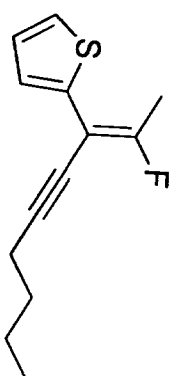

2.00  
0.98

1.94  
3.07

4.78

3.11

5.0

0.0

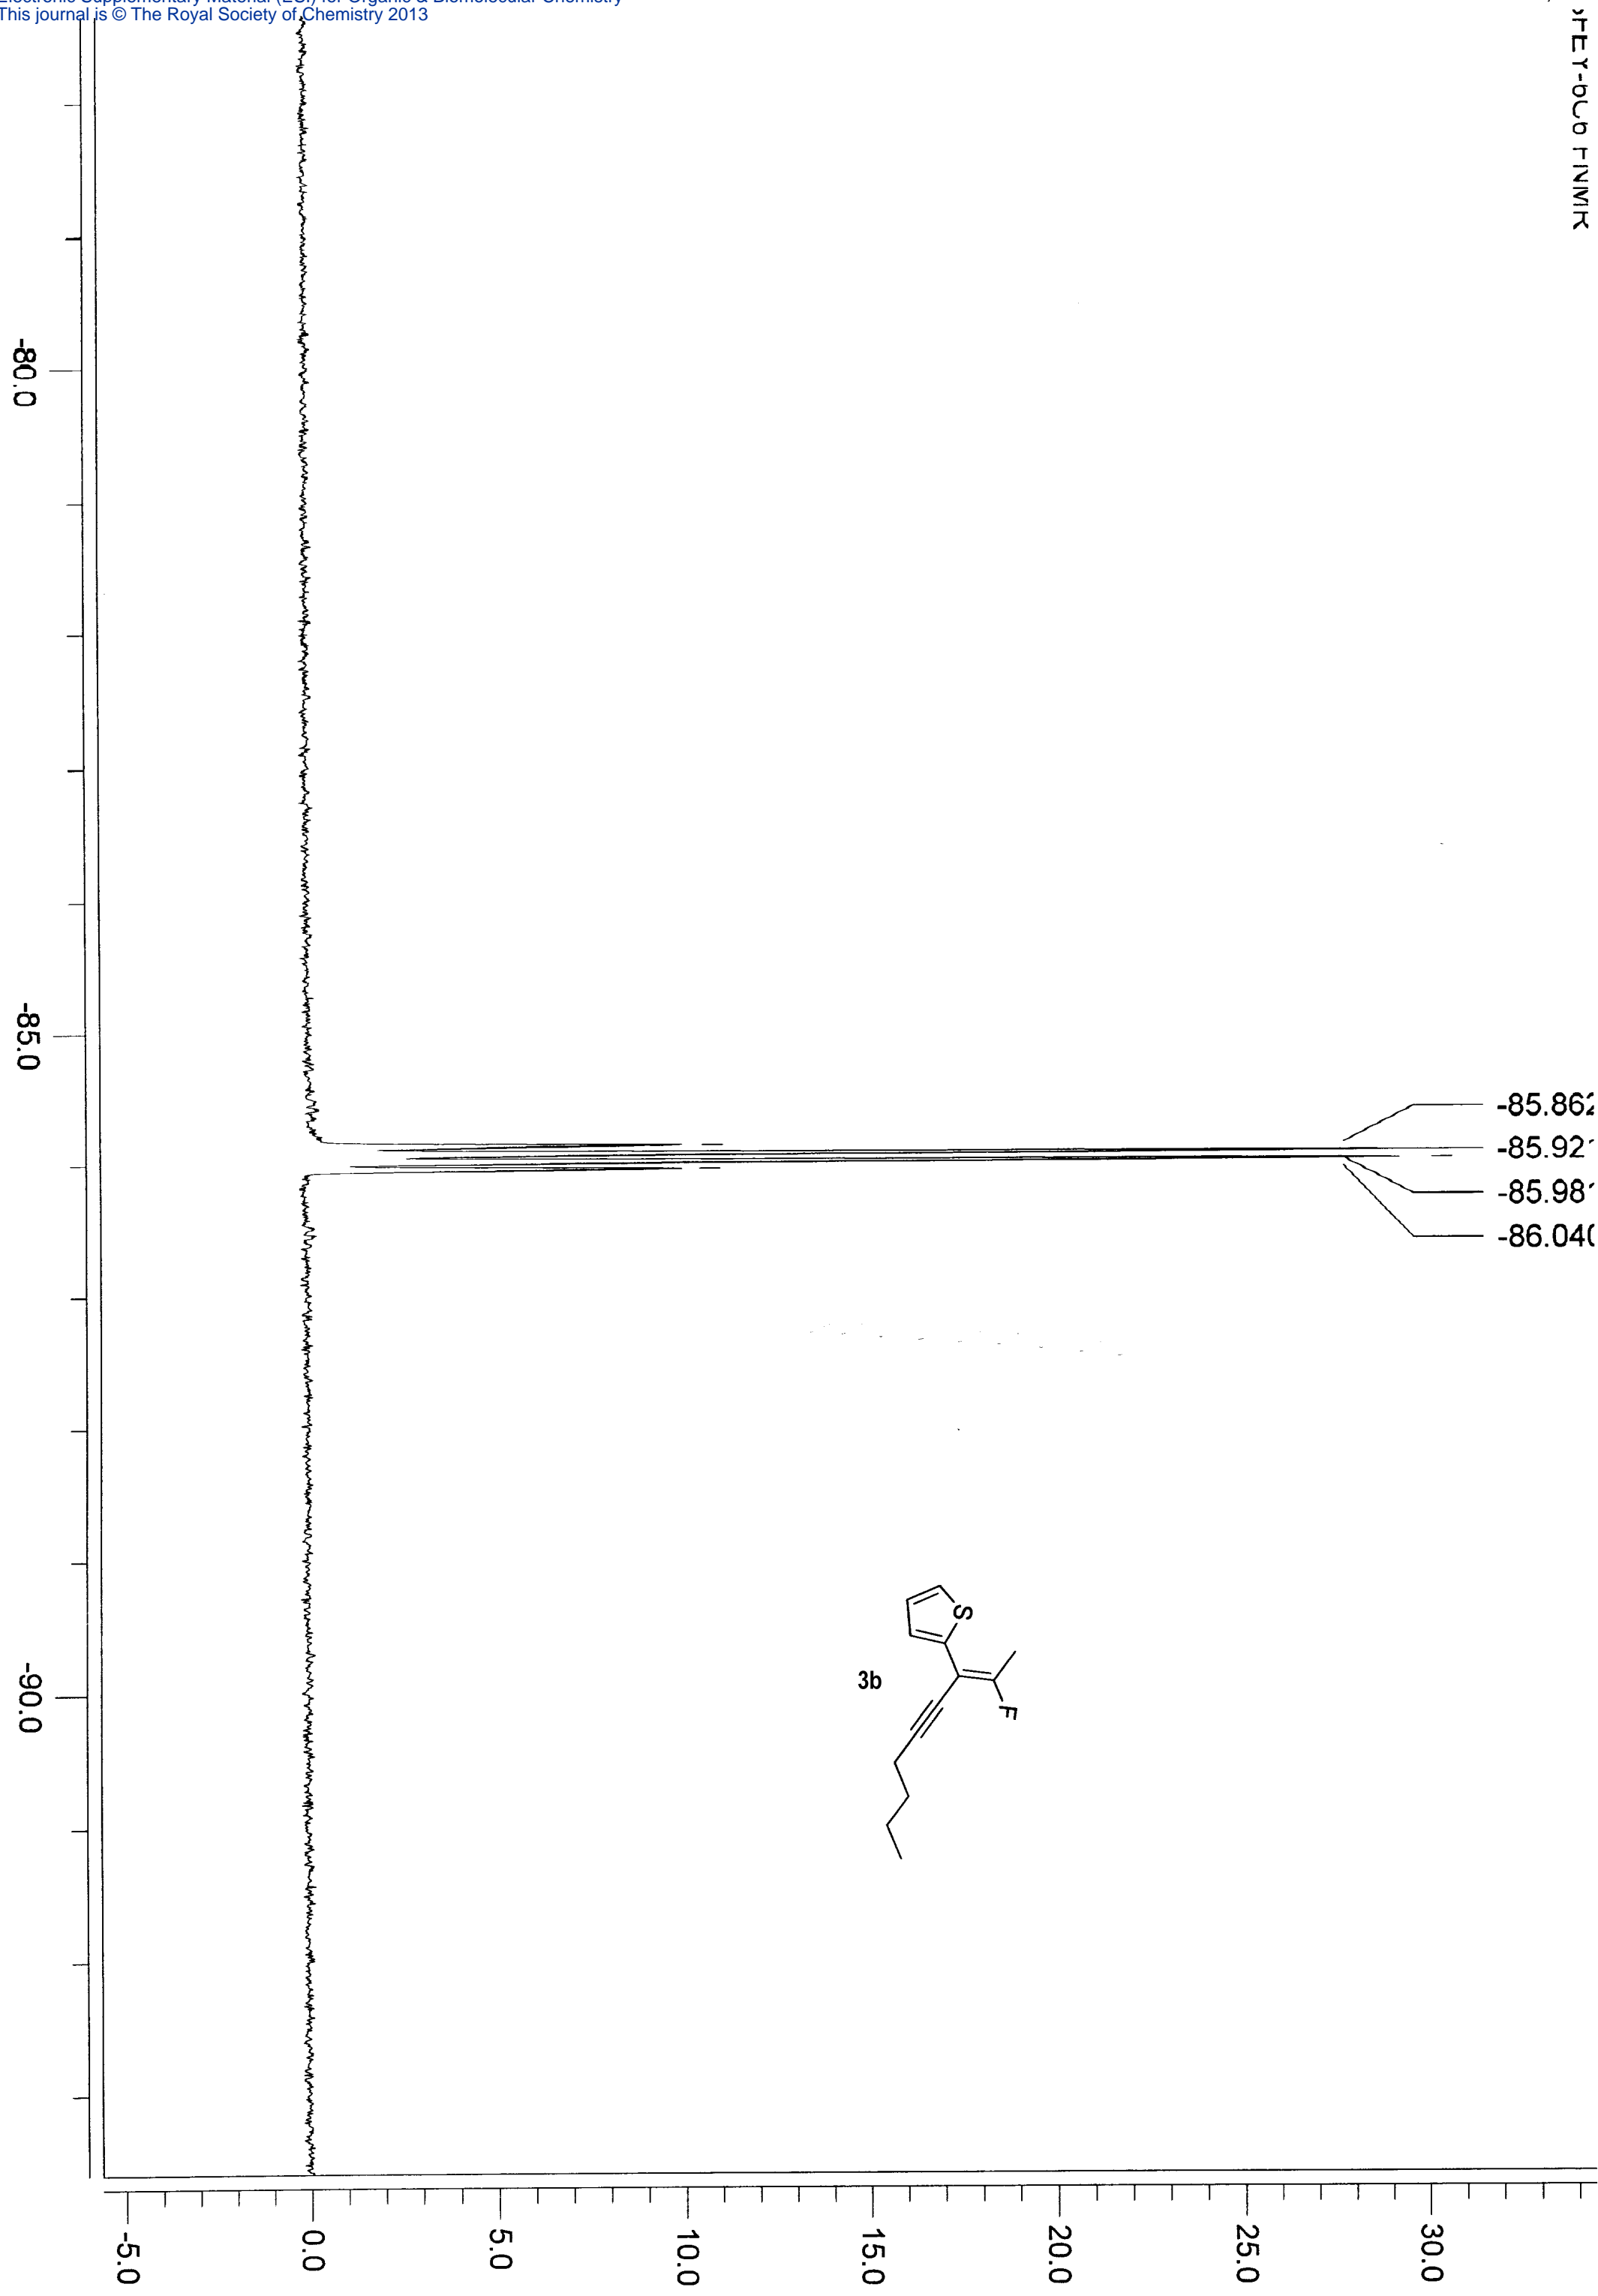

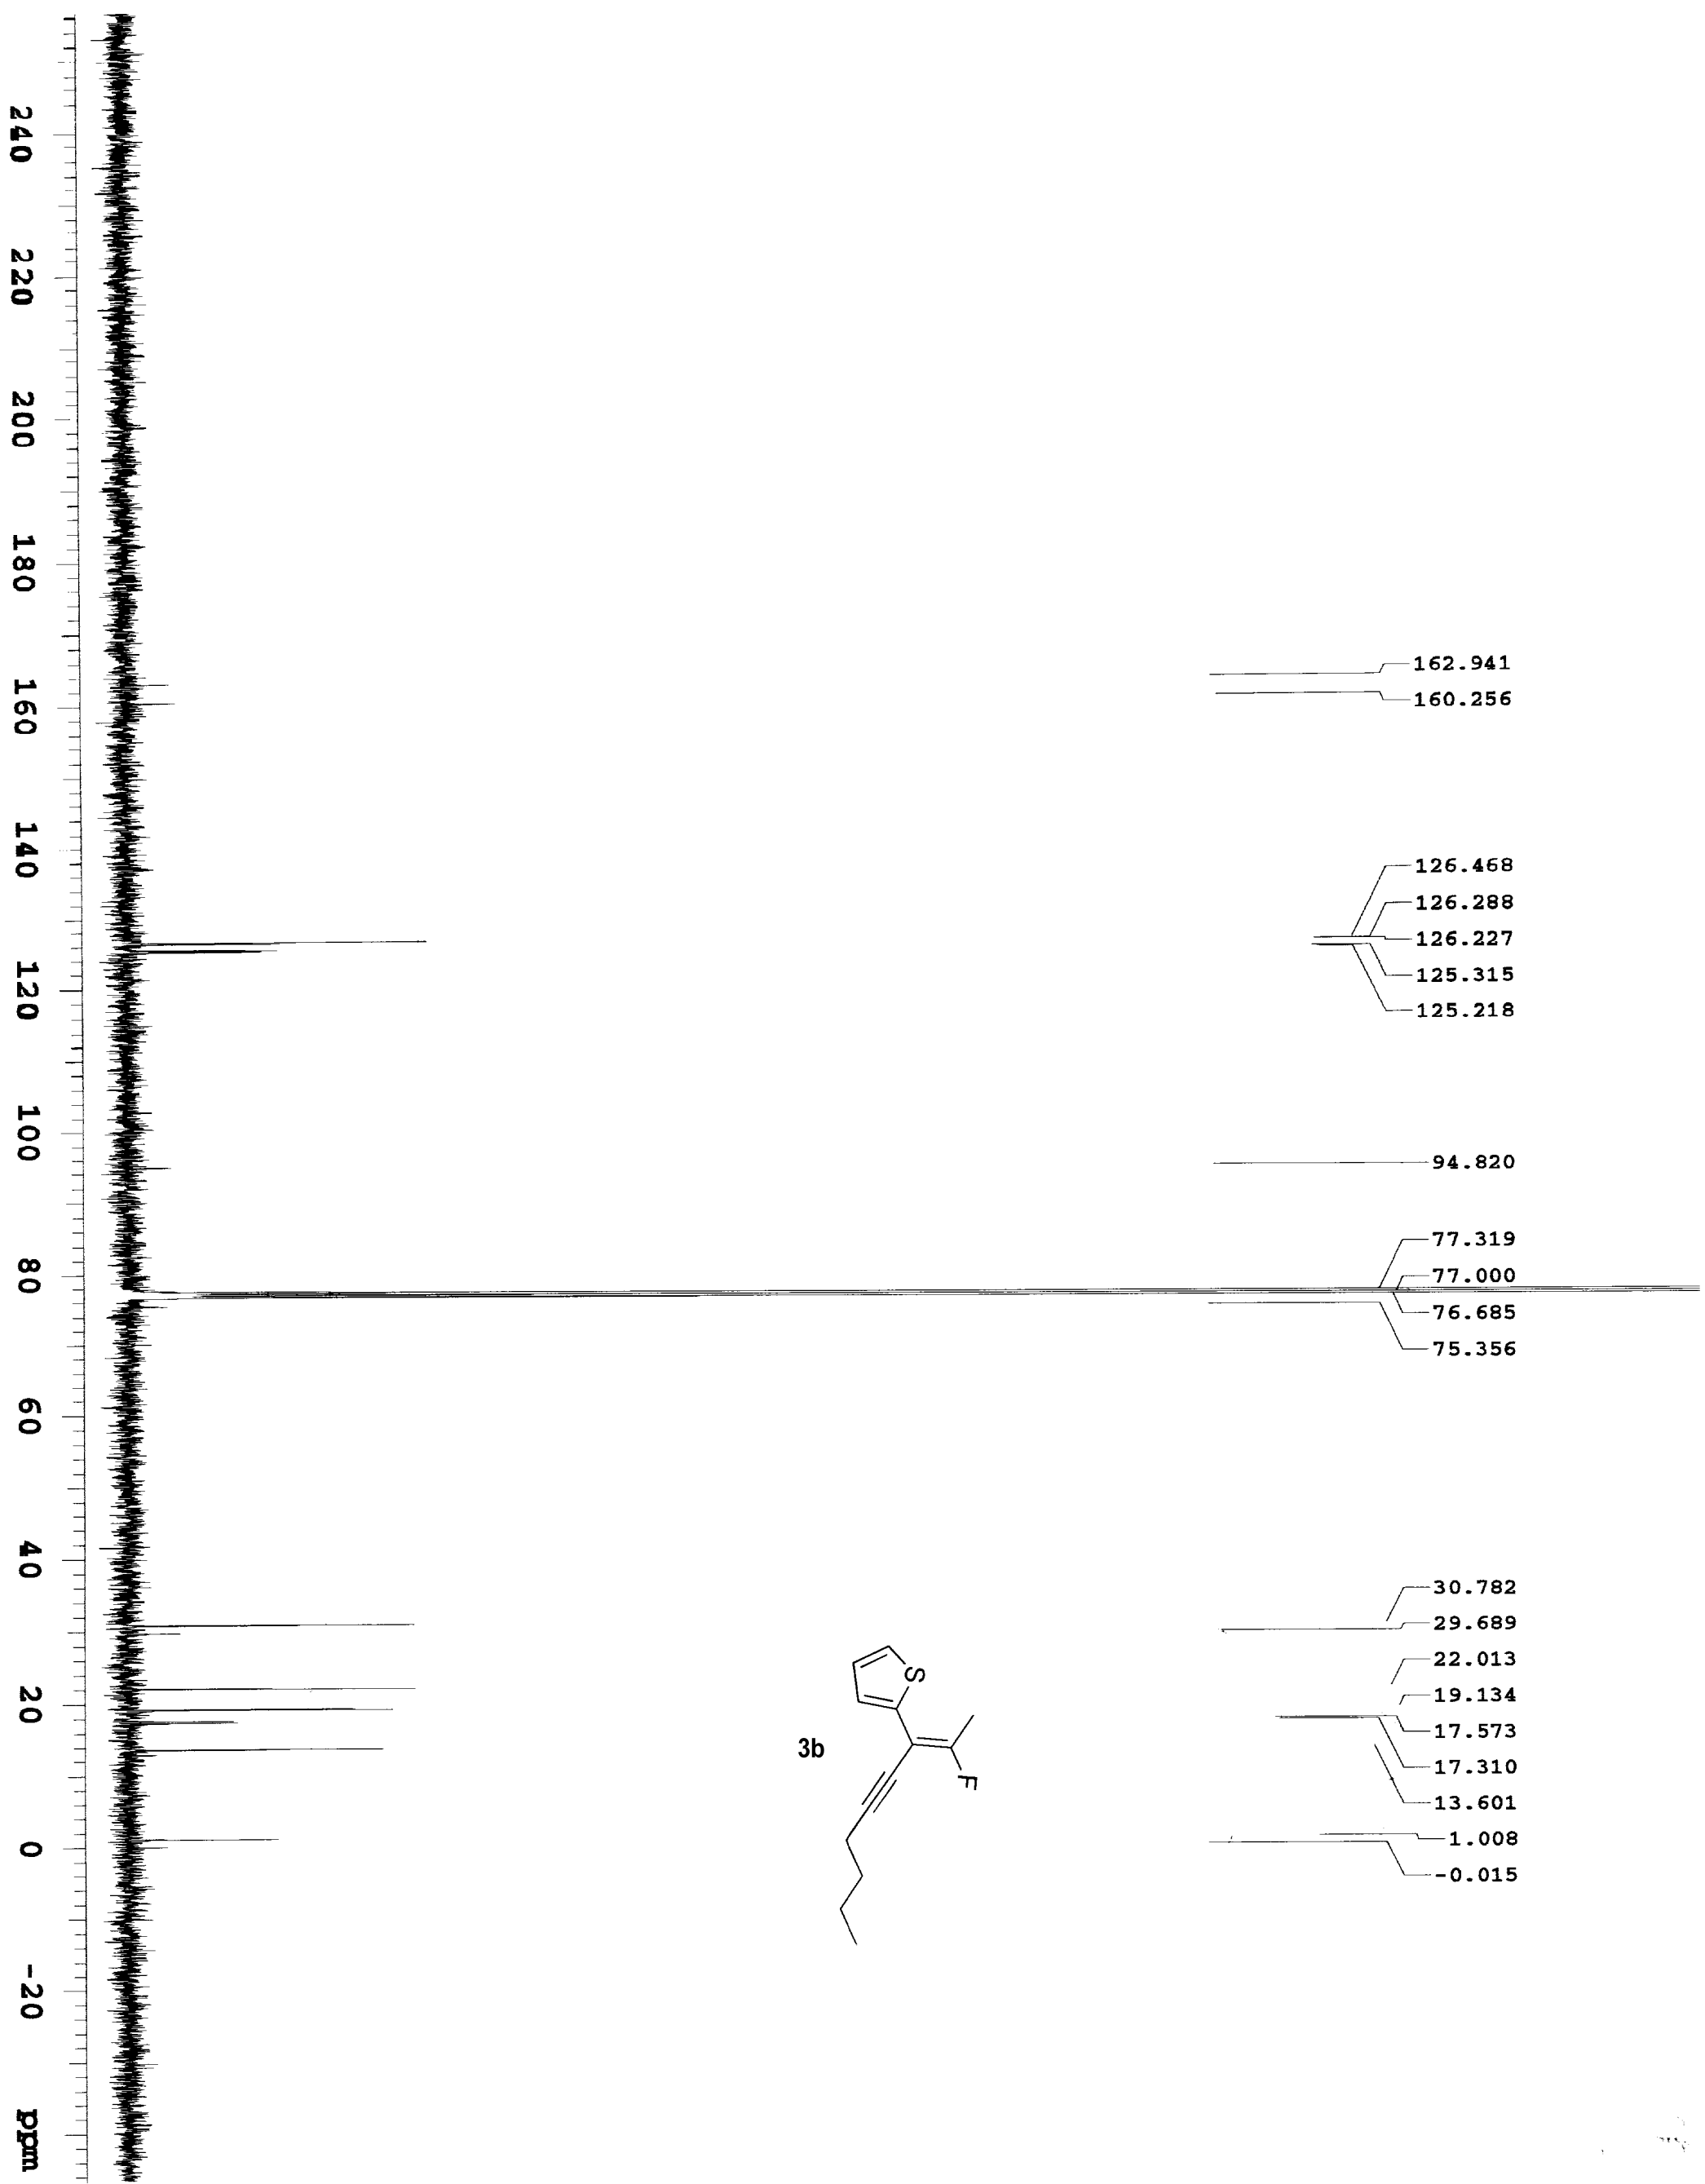

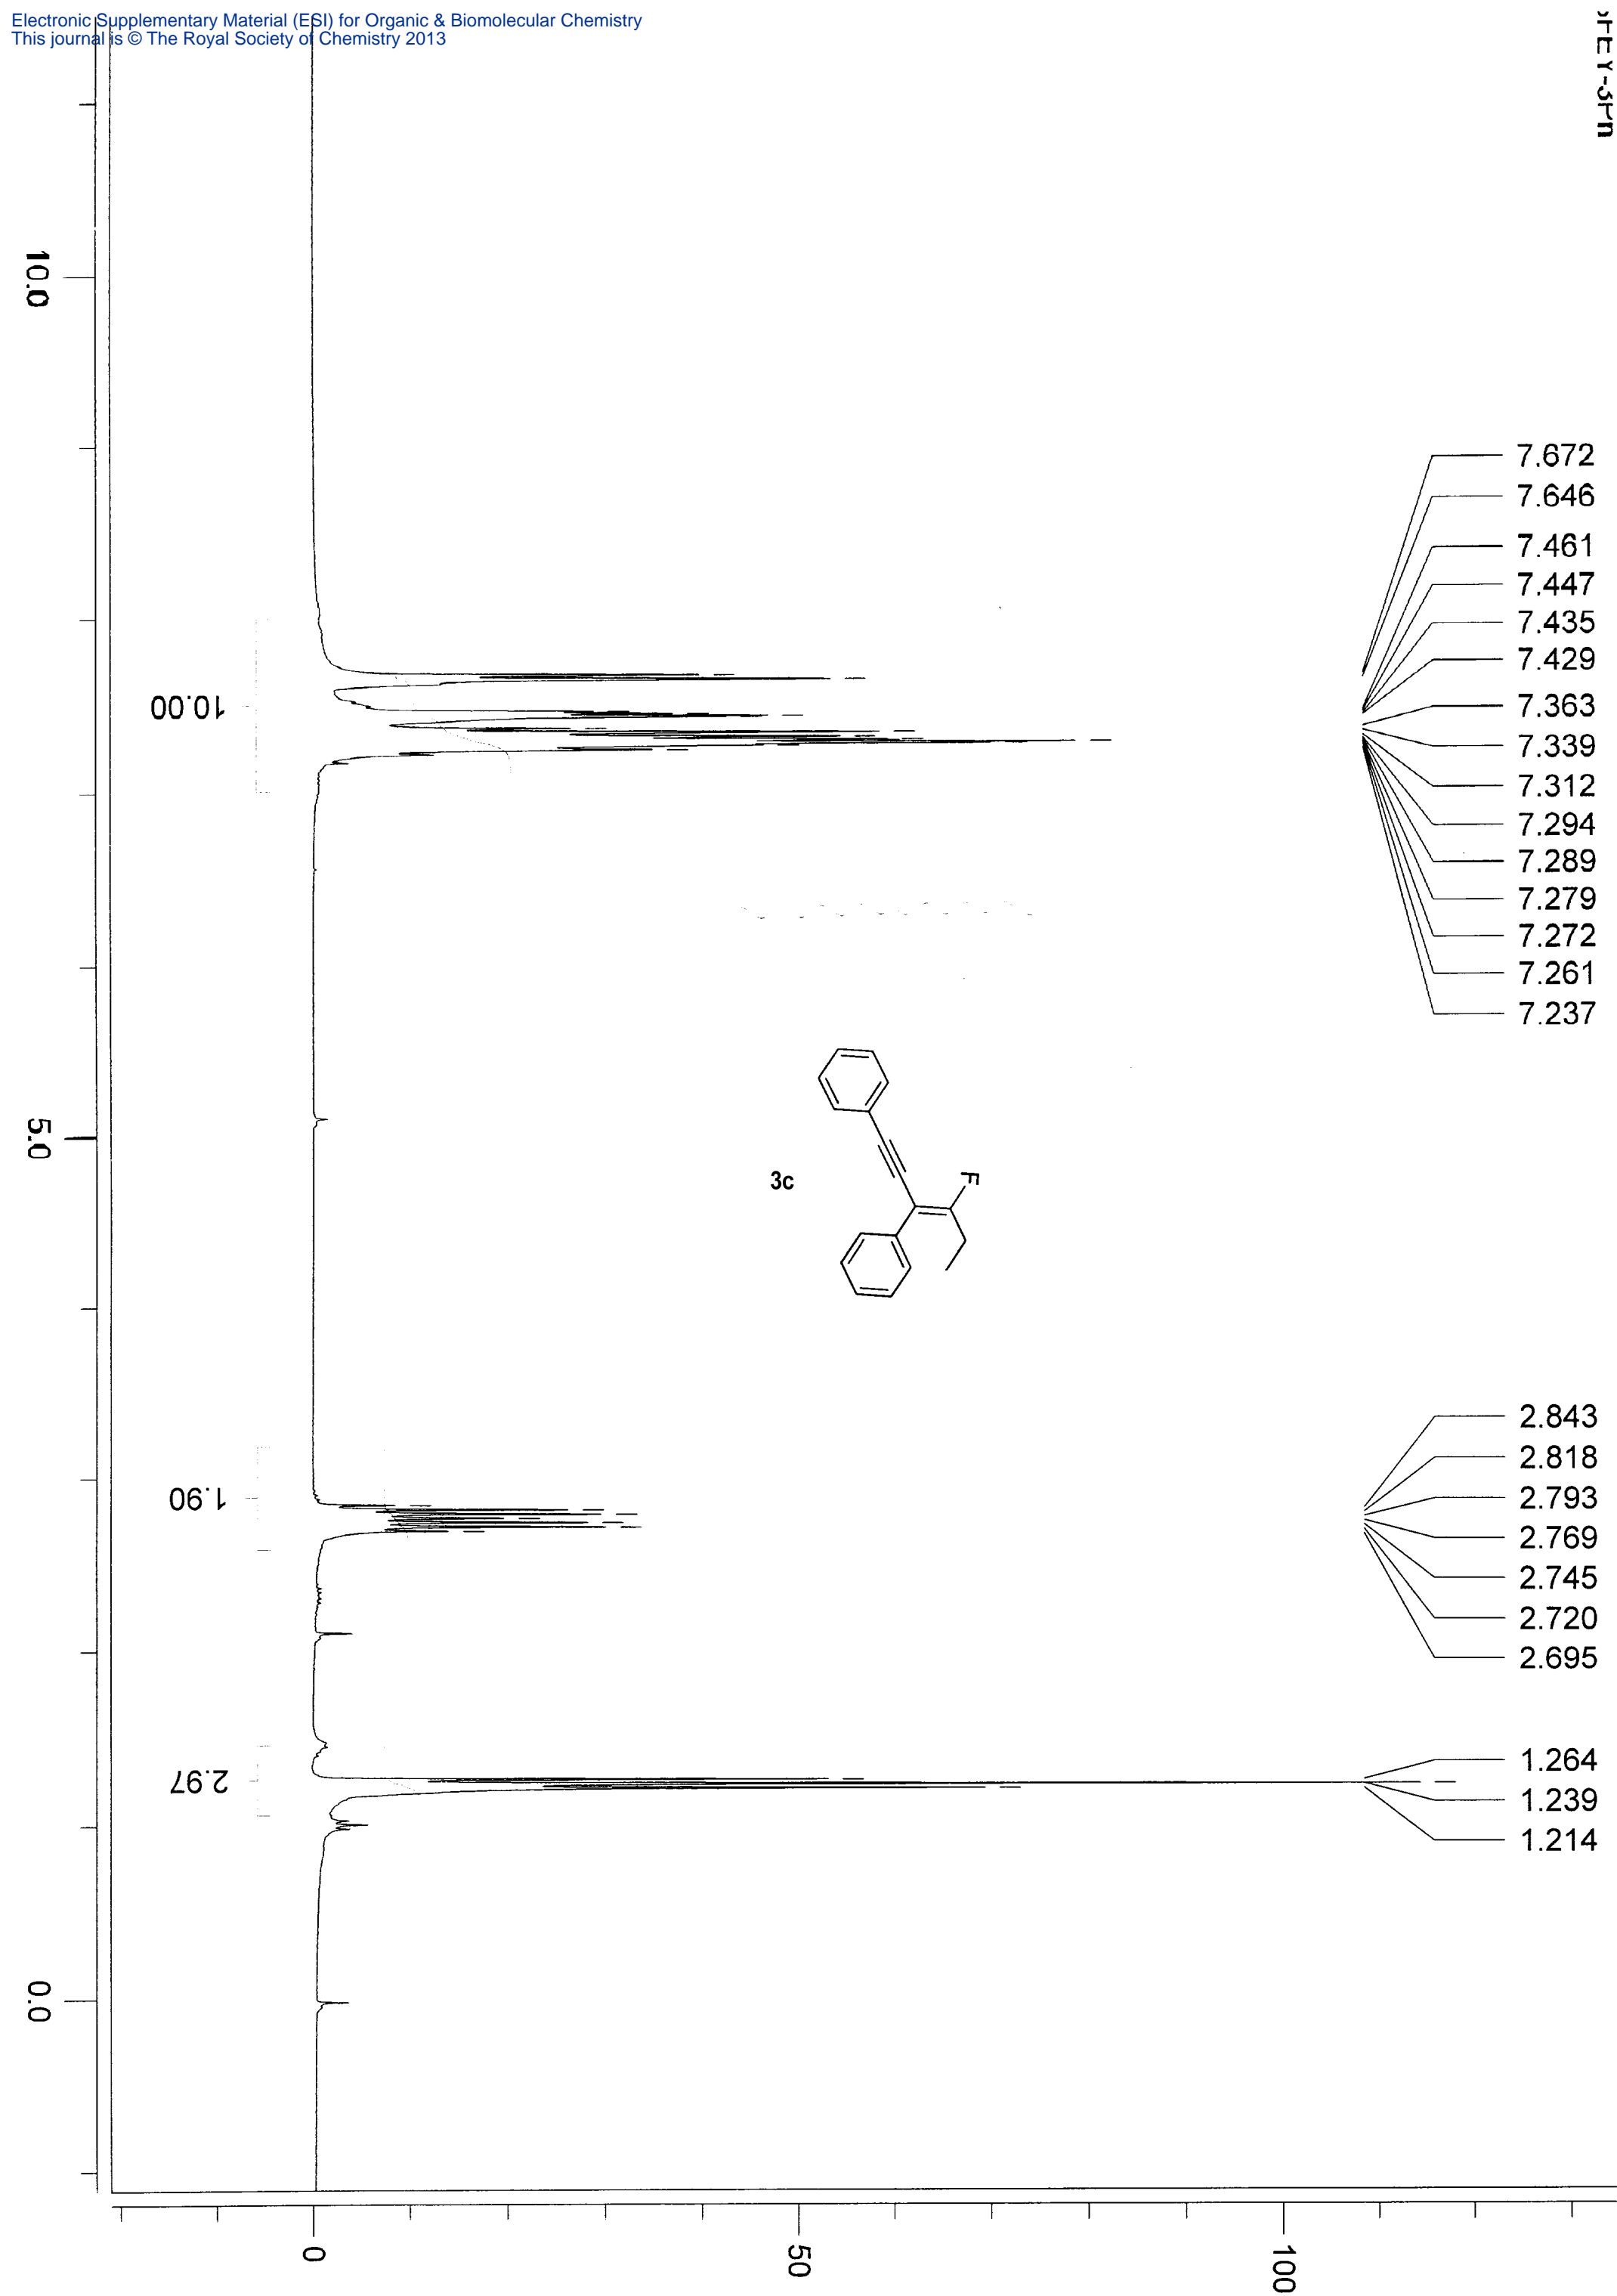



-97.623  
-97.699  
-97.777

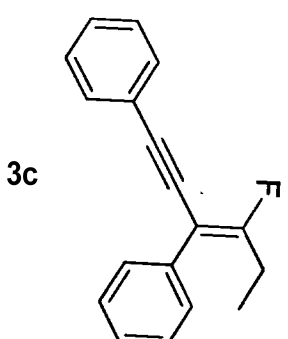

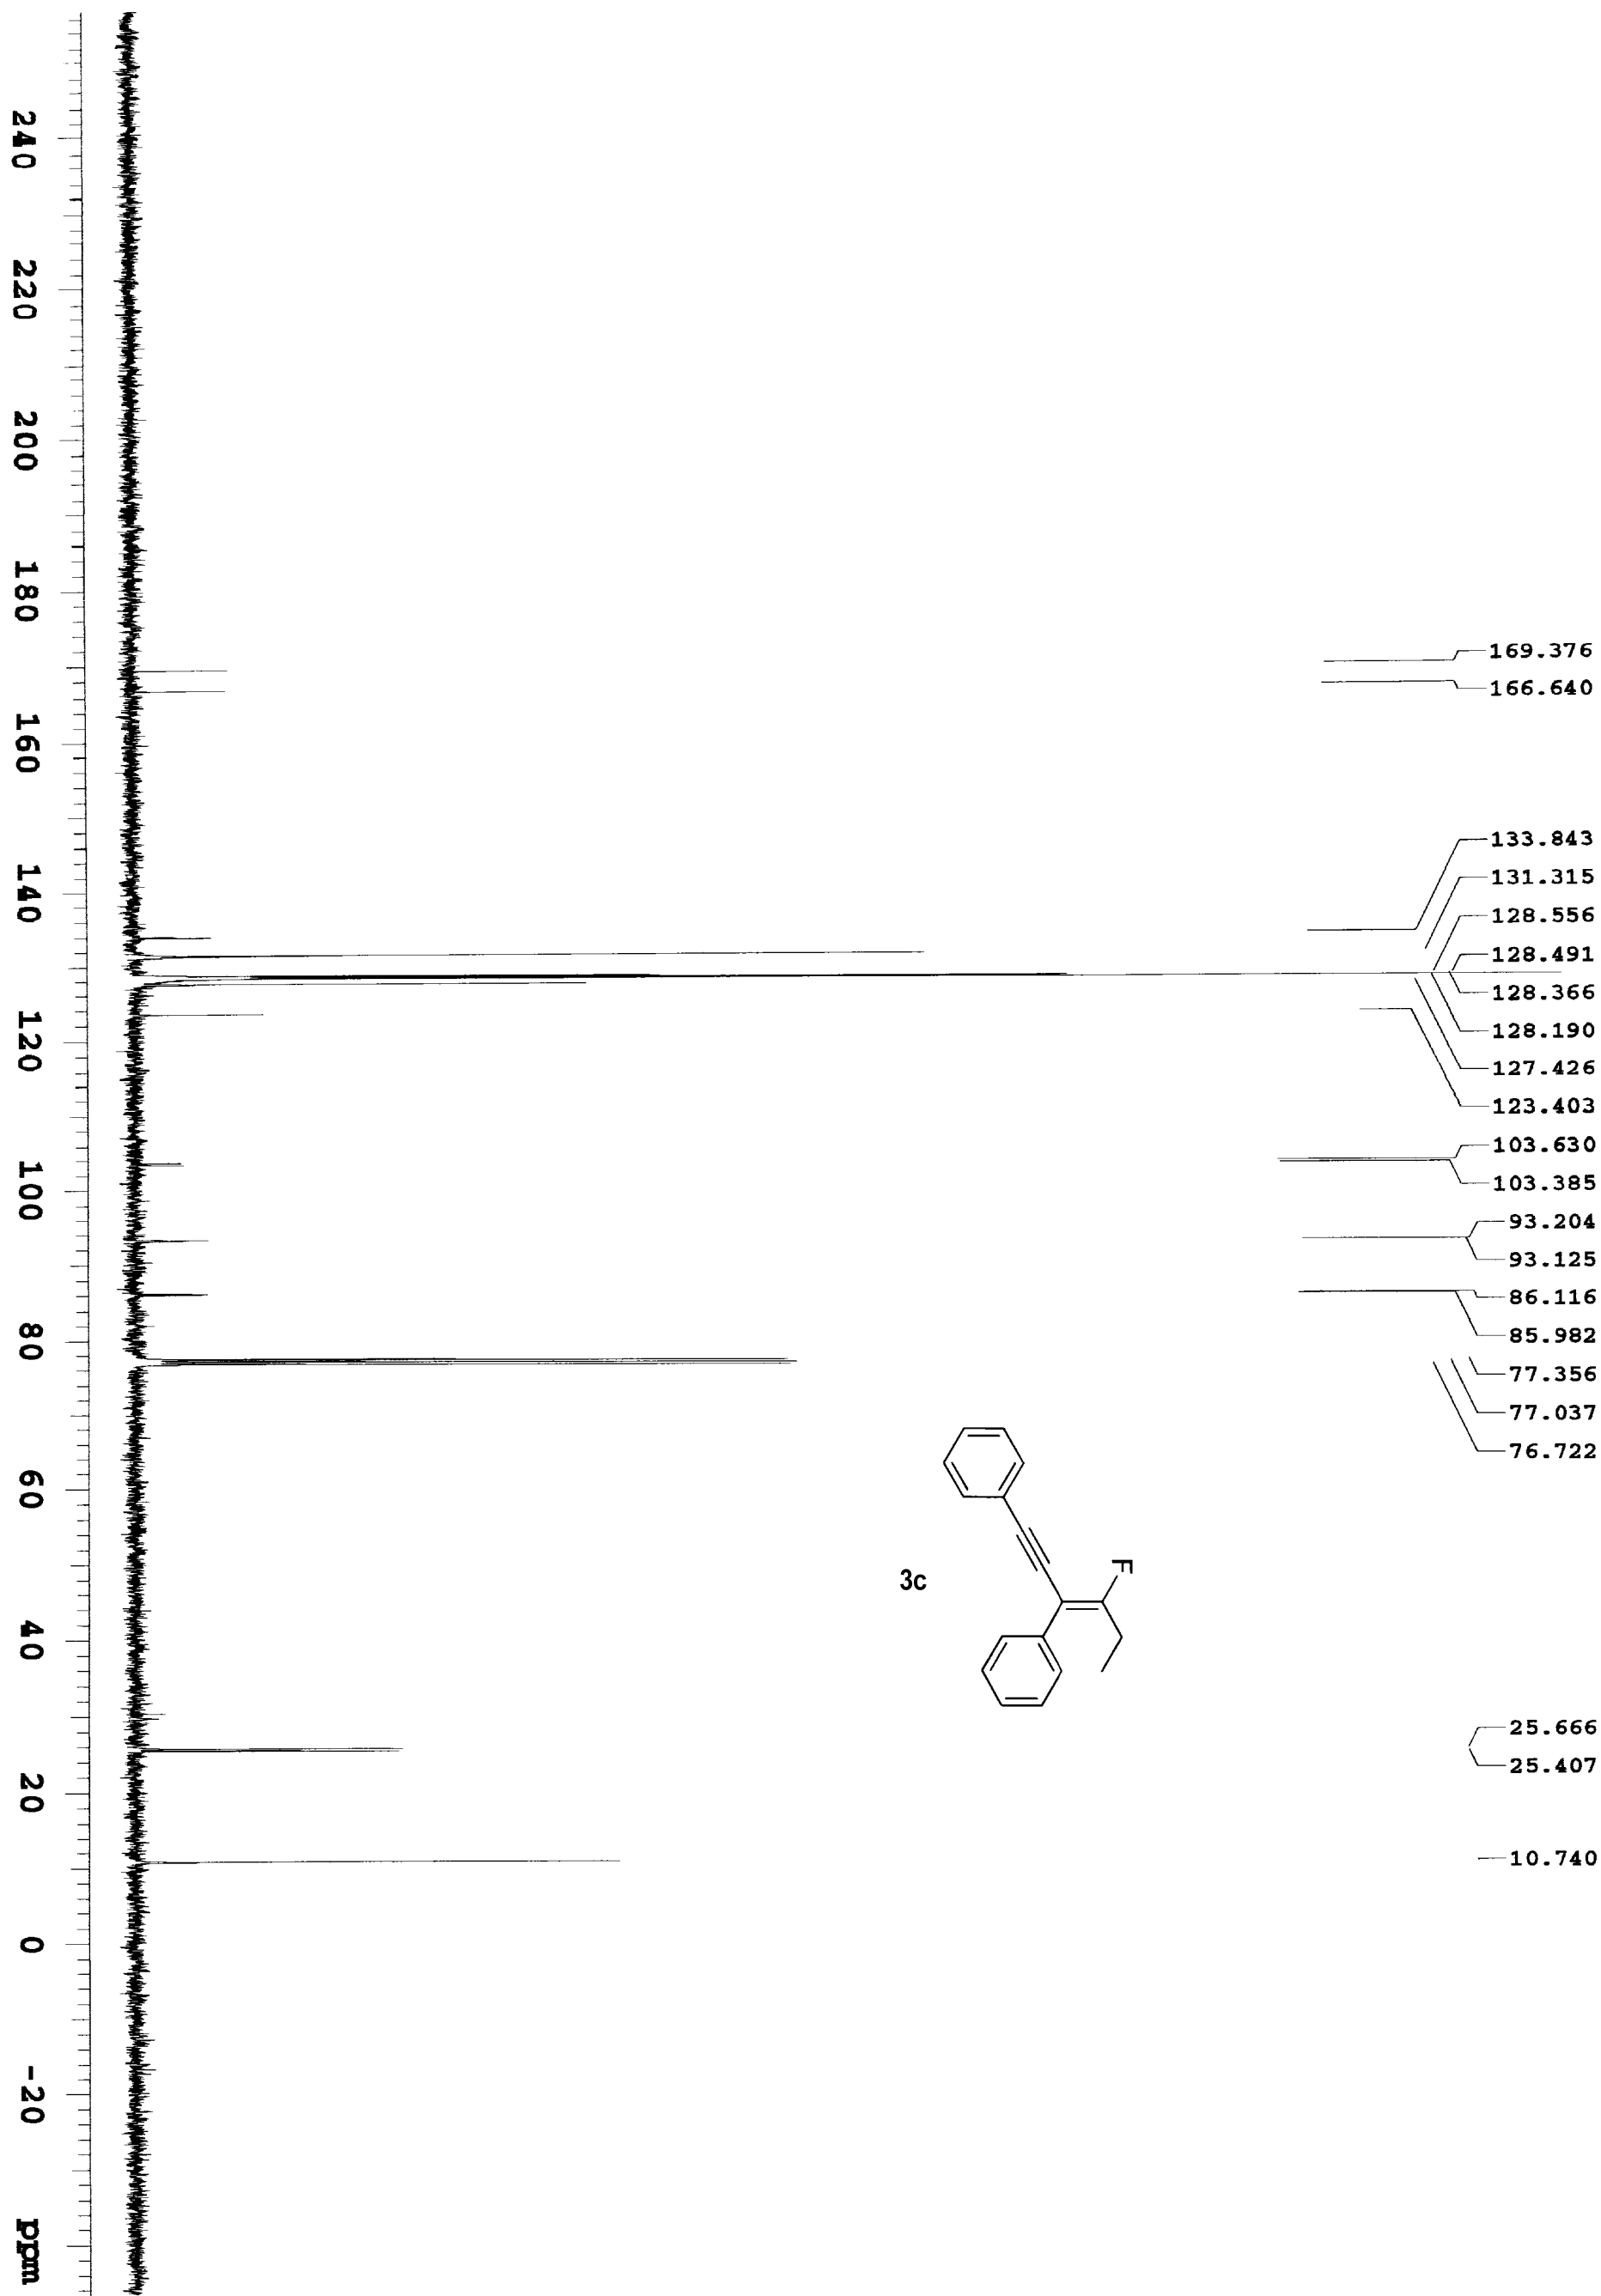

7.599  
7.574  
7.549  
7.320  
7.301  
7.276  
7.200

2.720  
2.694  
2.669  
2.646  
2.621  
2.596  
2.364  
2.340  
2.318

1.566  
1.542  
1.518  
1.494  
1.468  
1.444  
1.419  
1.395  
1.210  
1.185  
1.160  
1.142  
1.134

0.964  
0.936  
0.911  
0.886  
0.869  
0.862

3d

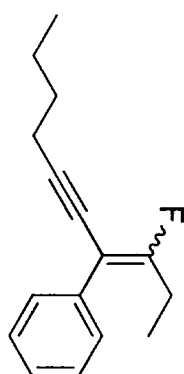

1.00

0.80

2.21

10.0

5.0

0.0

0

50

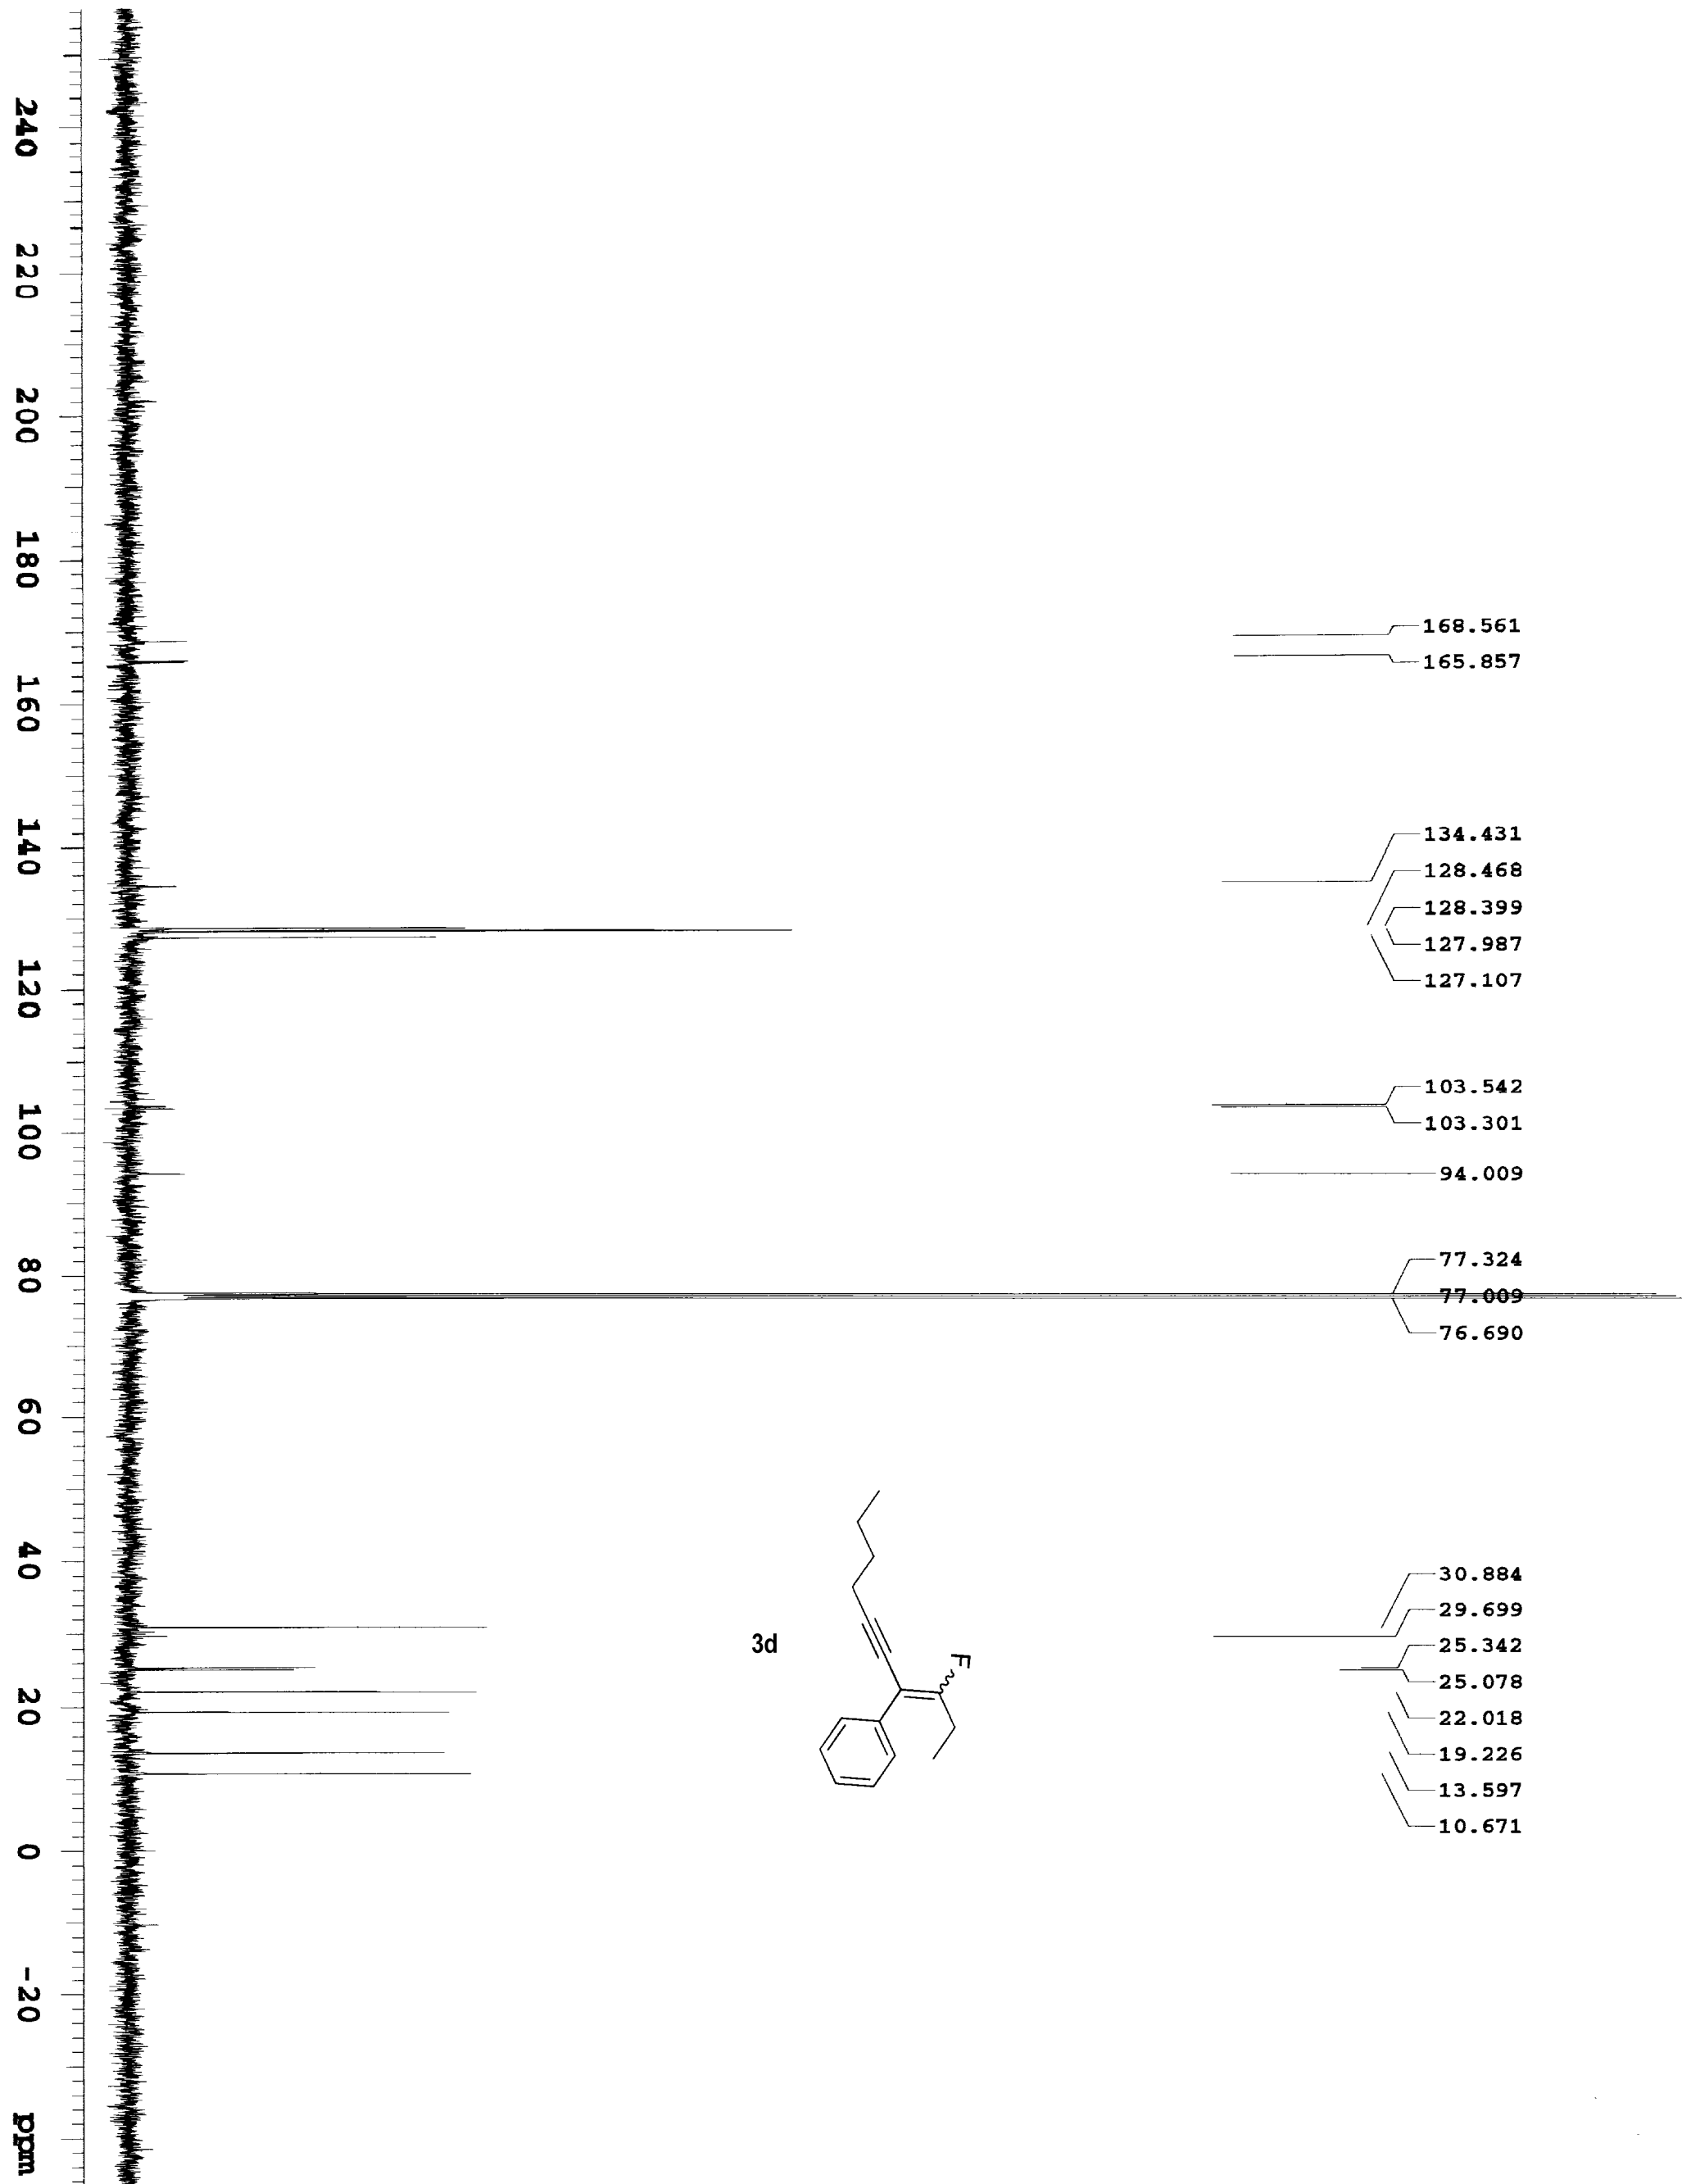

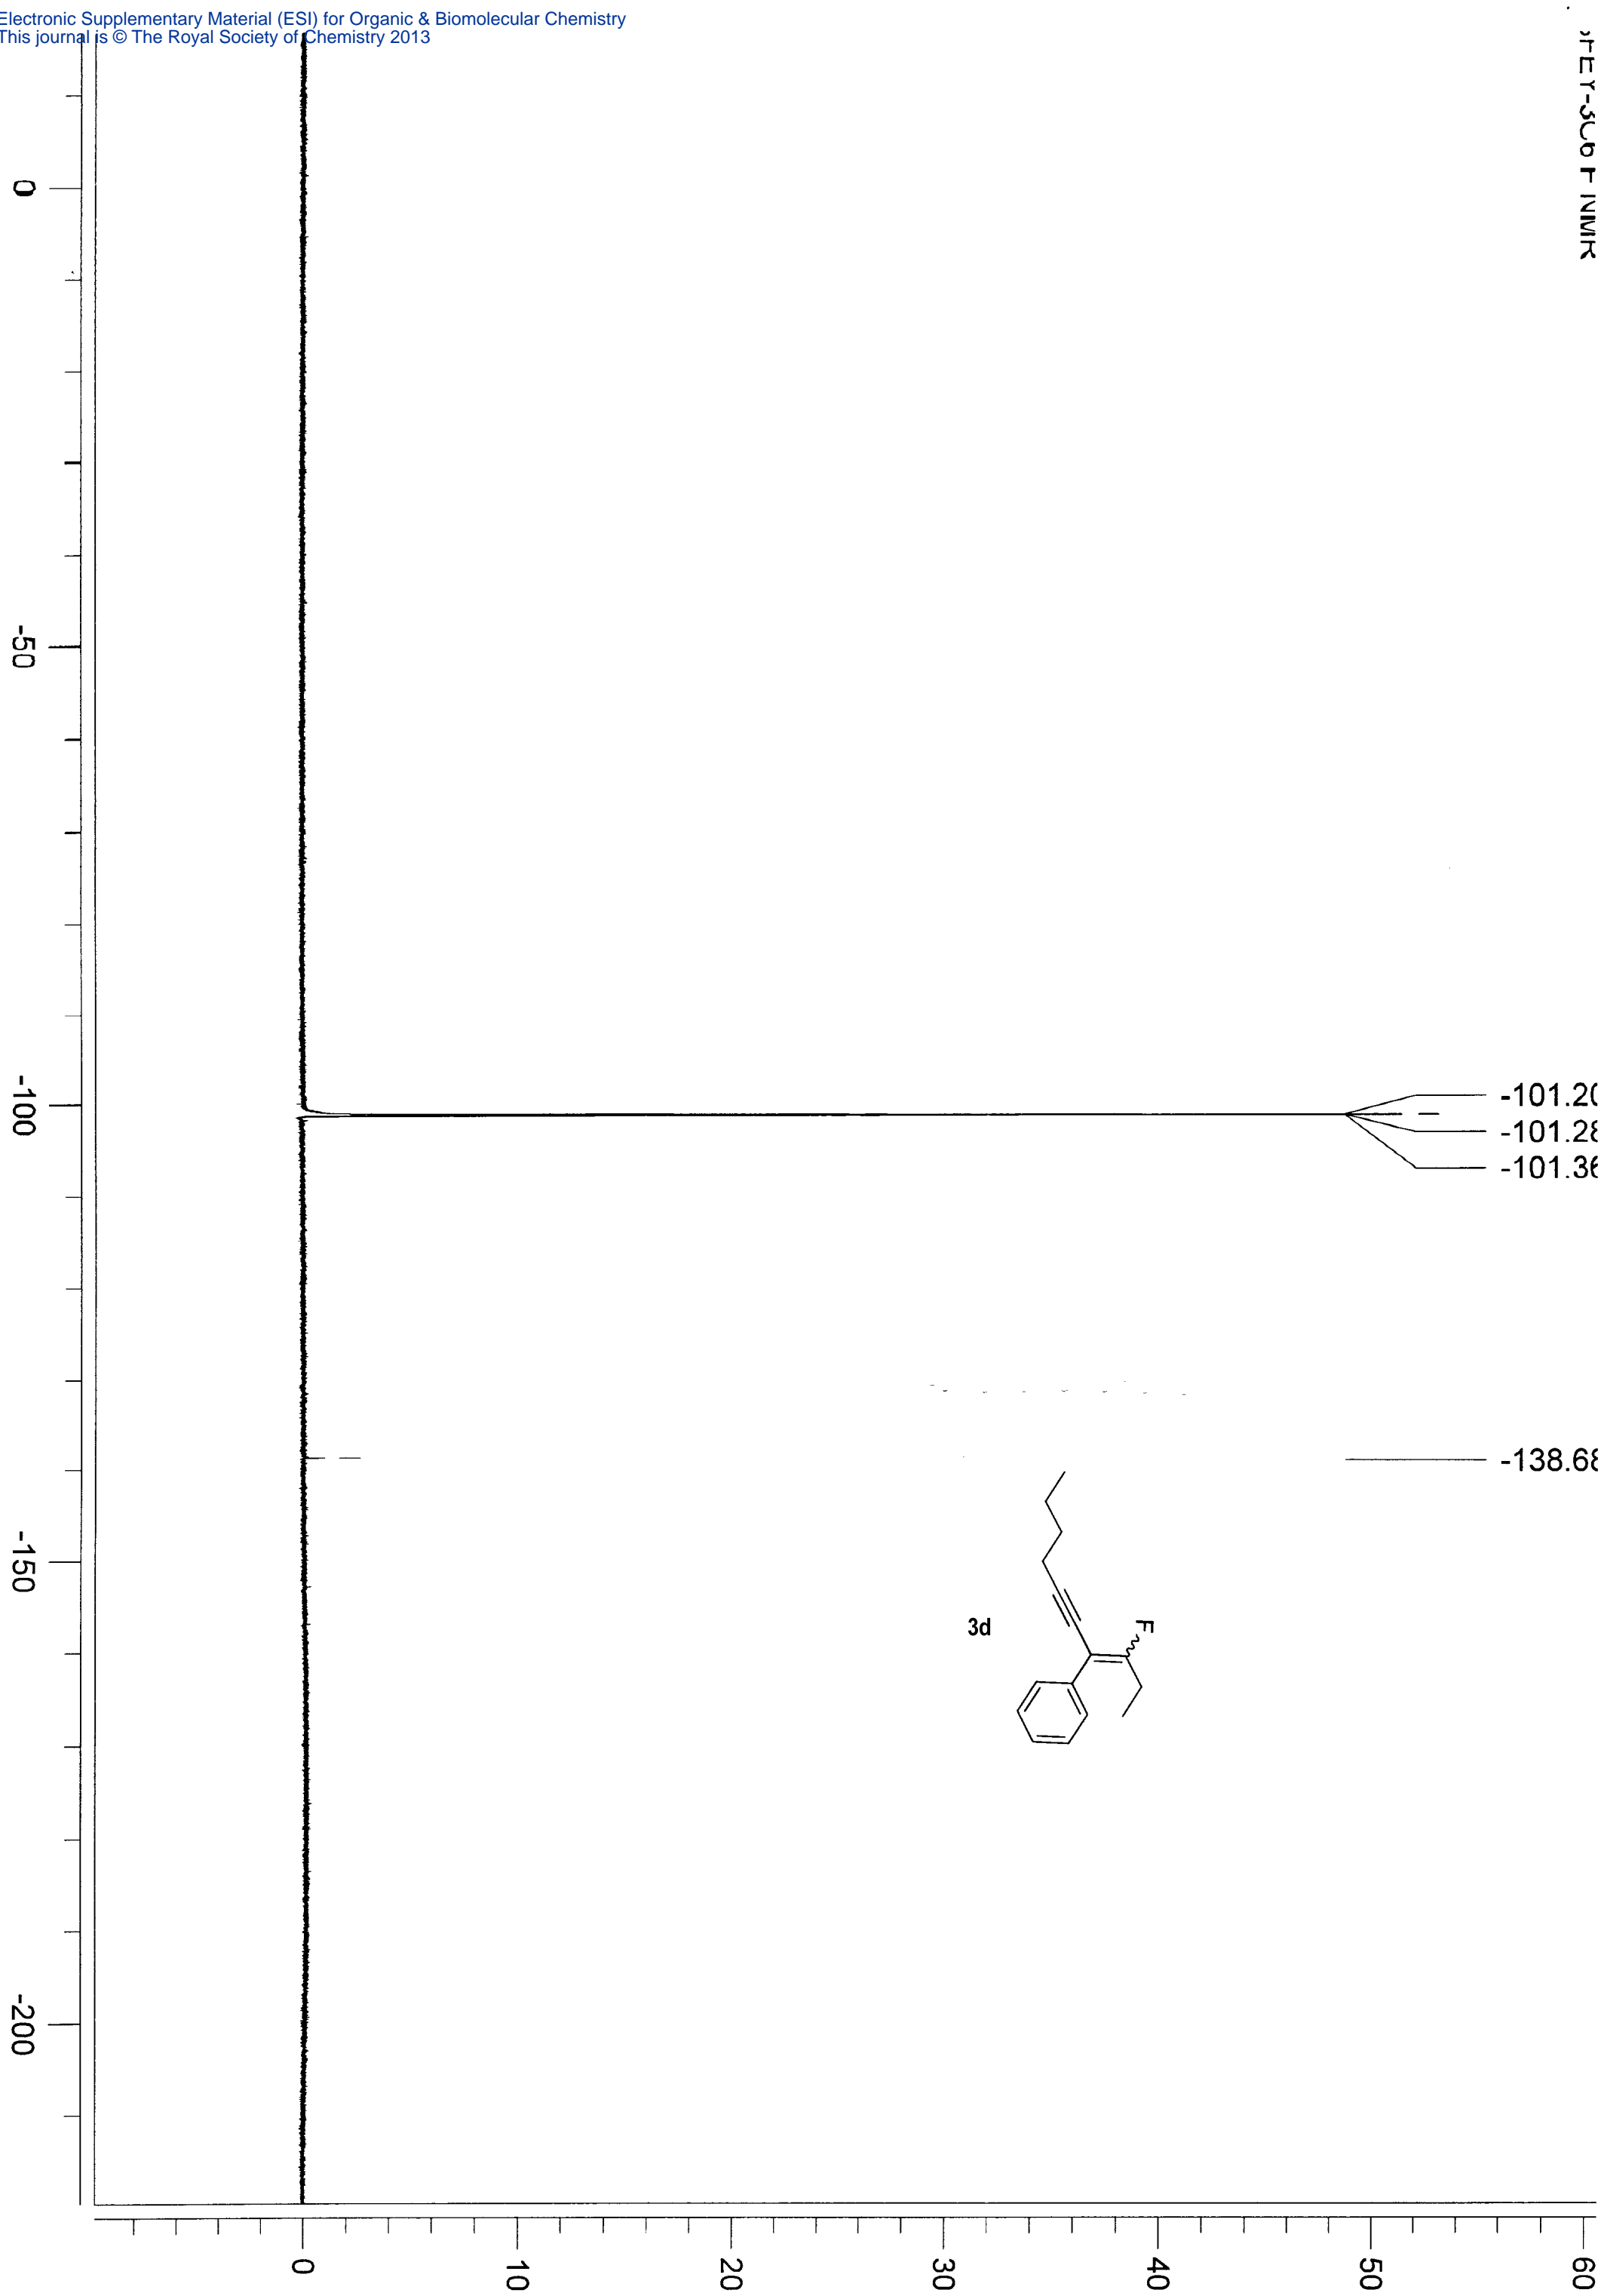

7.303  
7.294  
7.280  
7.249  
7.224

4.206  
4.181  
4.157  
4.133

2.399  
2.374  
2.350  
2.325  
2.300  
2.275  
1.257  
1.233  
1.209  
1.183  
1.110  
1.085  
1.060

4.86

2.00

1.81

7.00

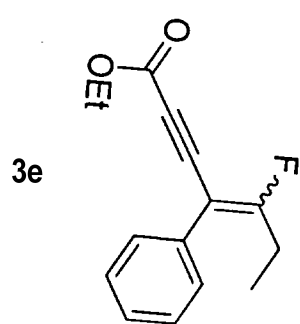

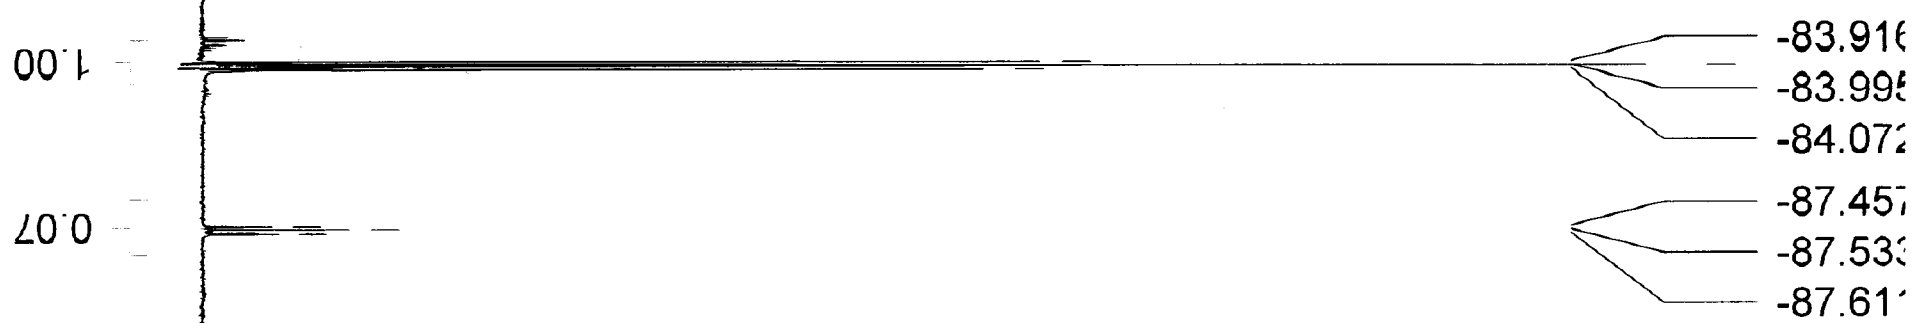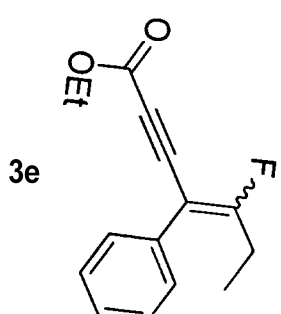

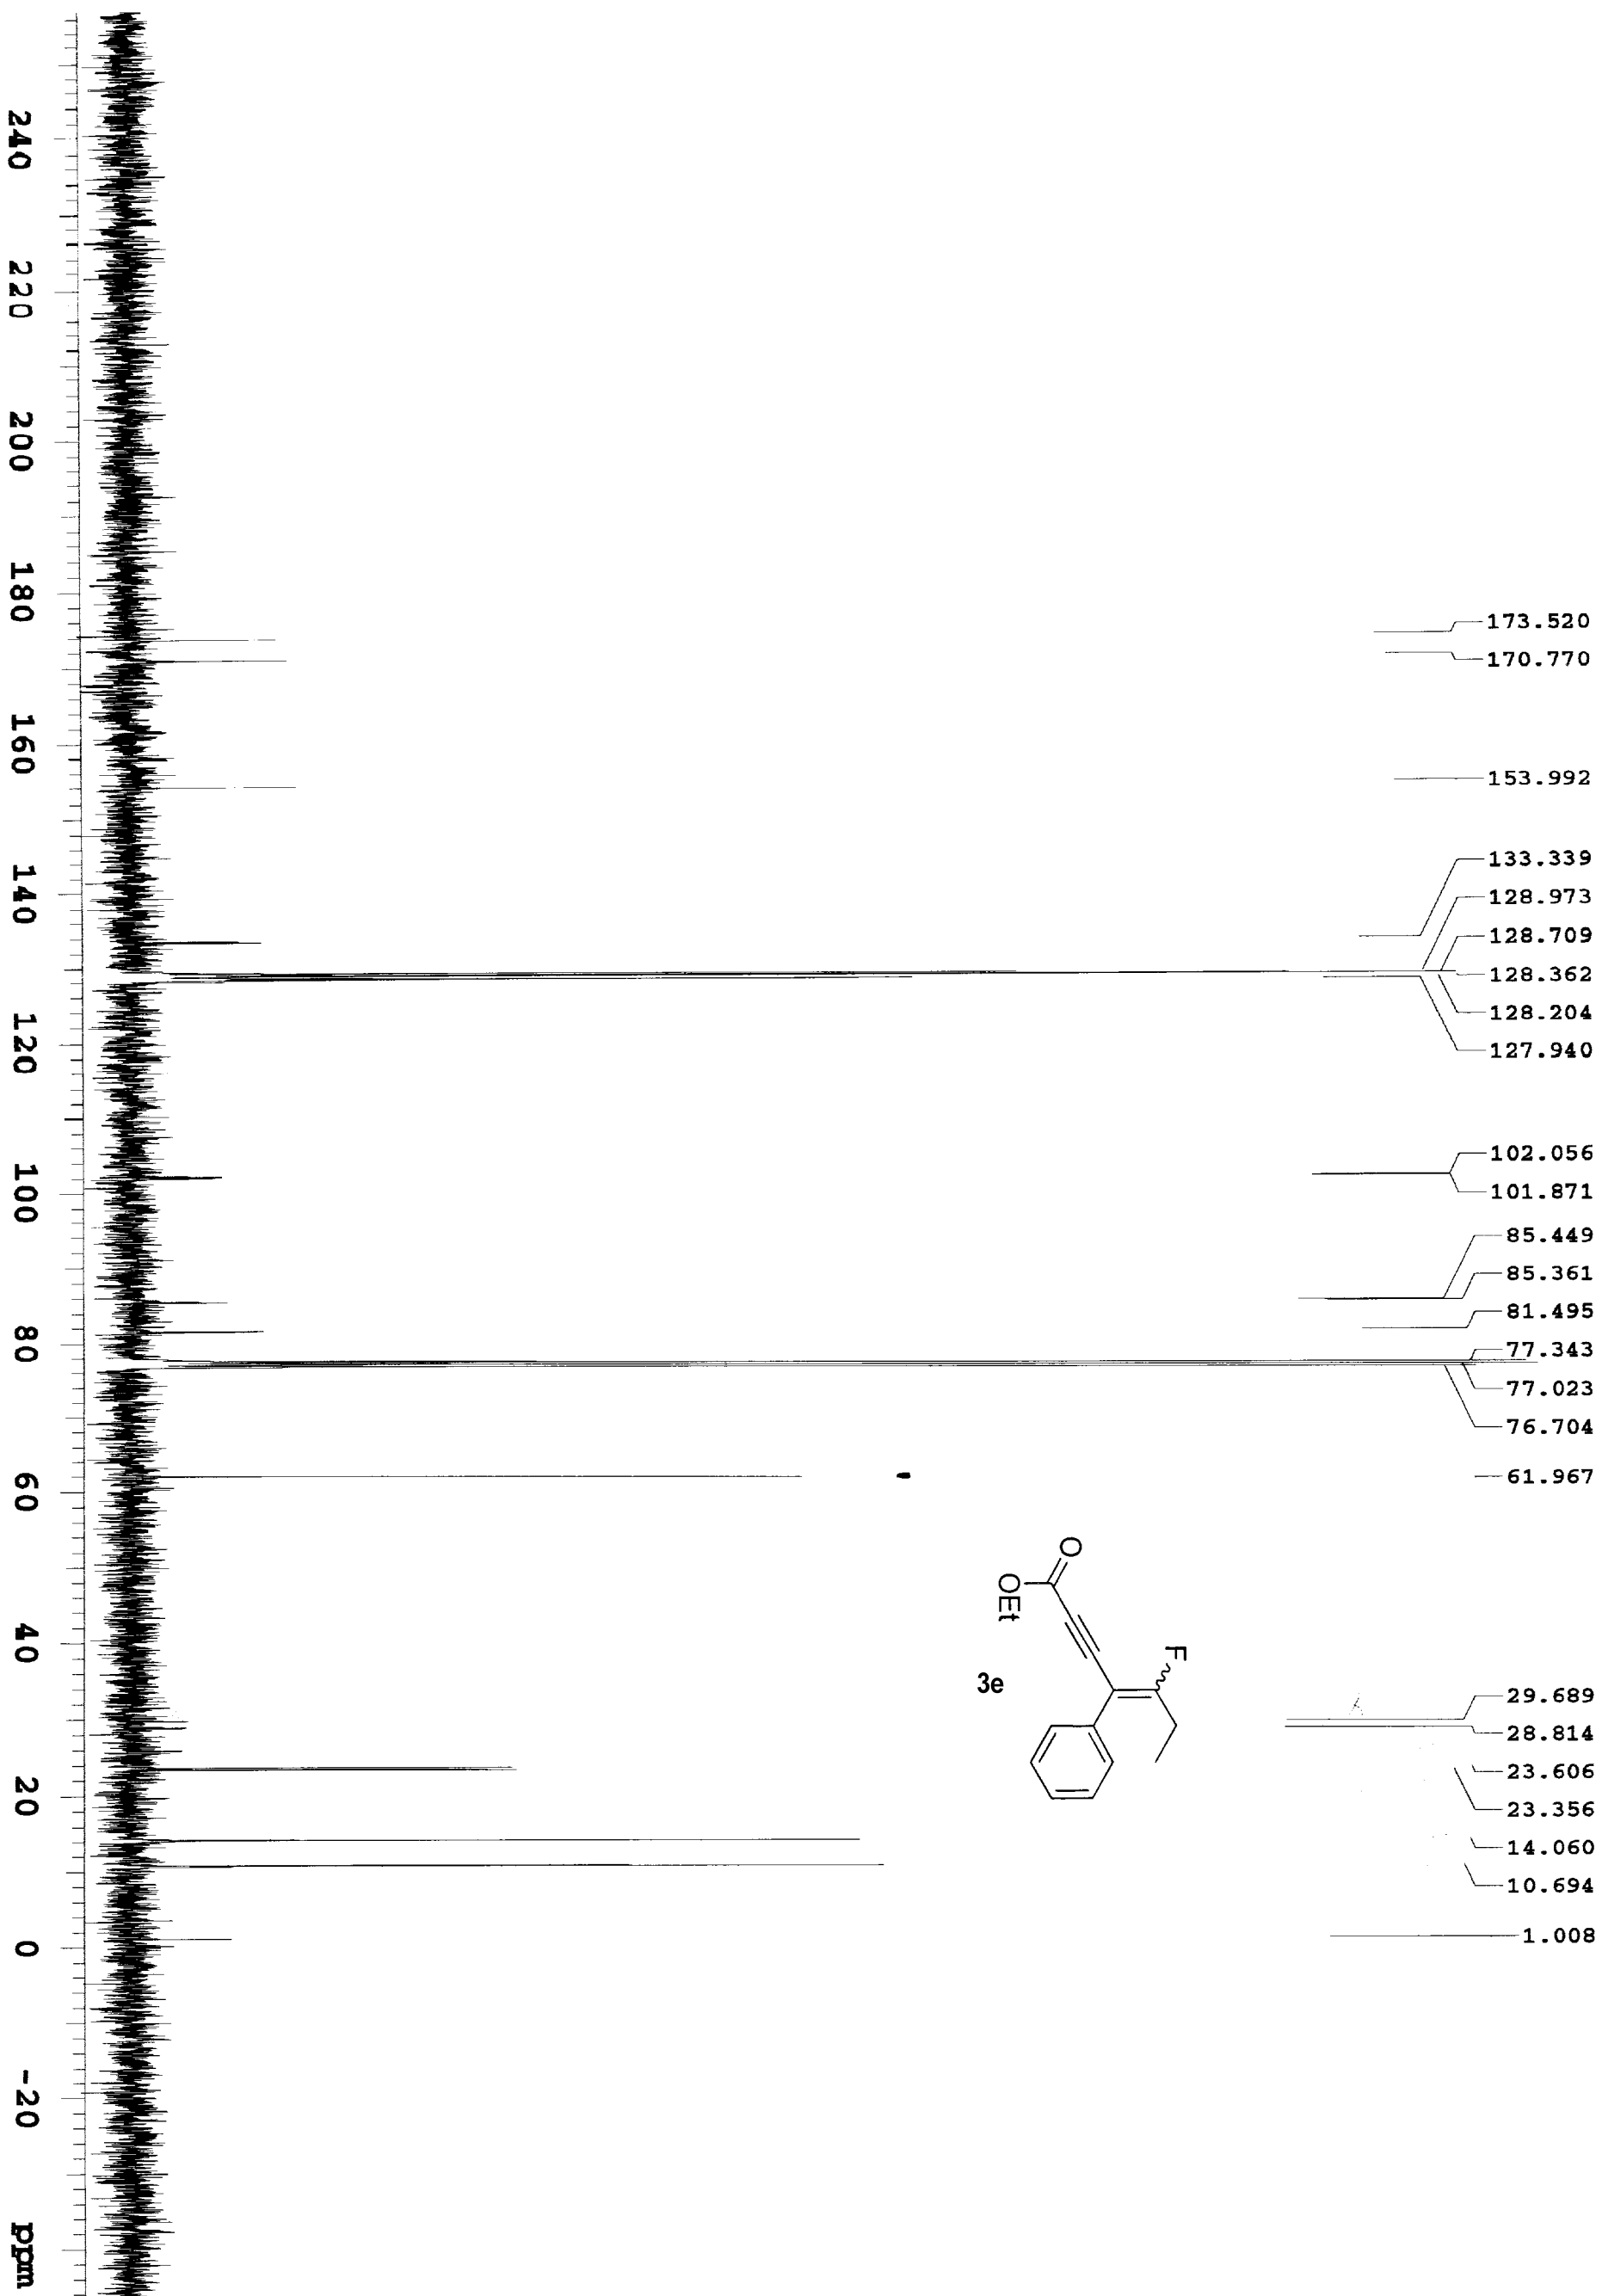



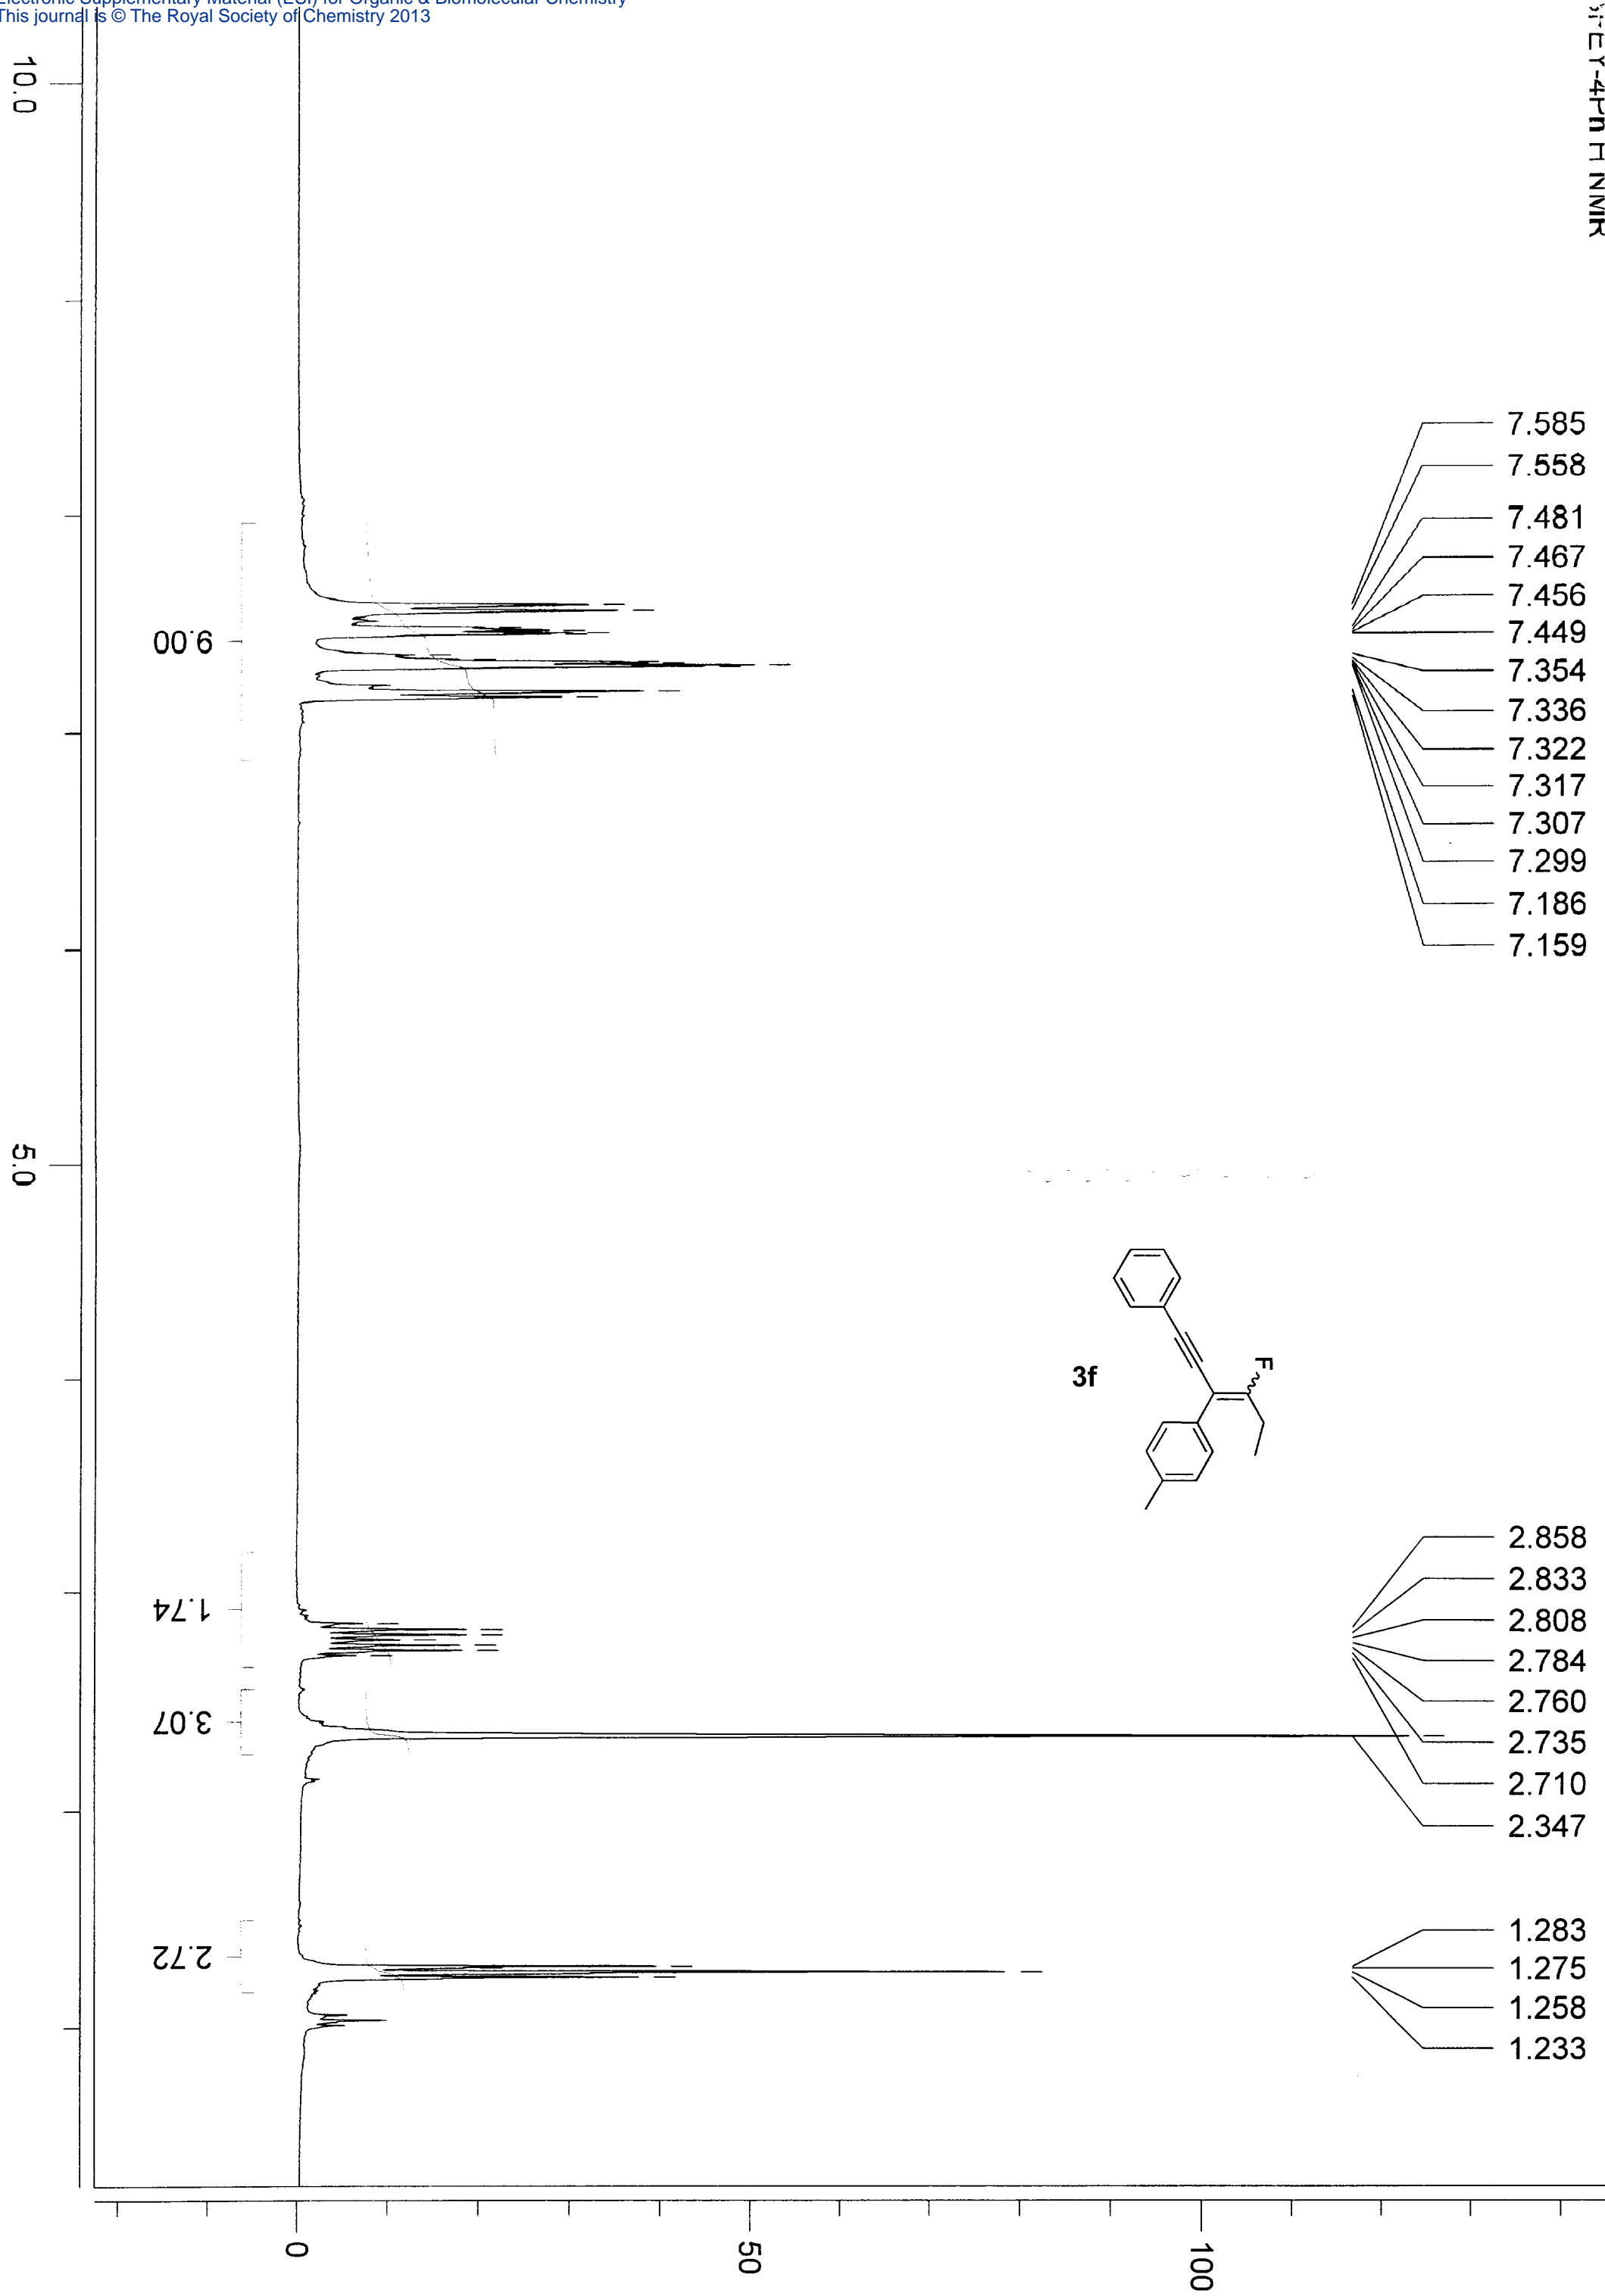

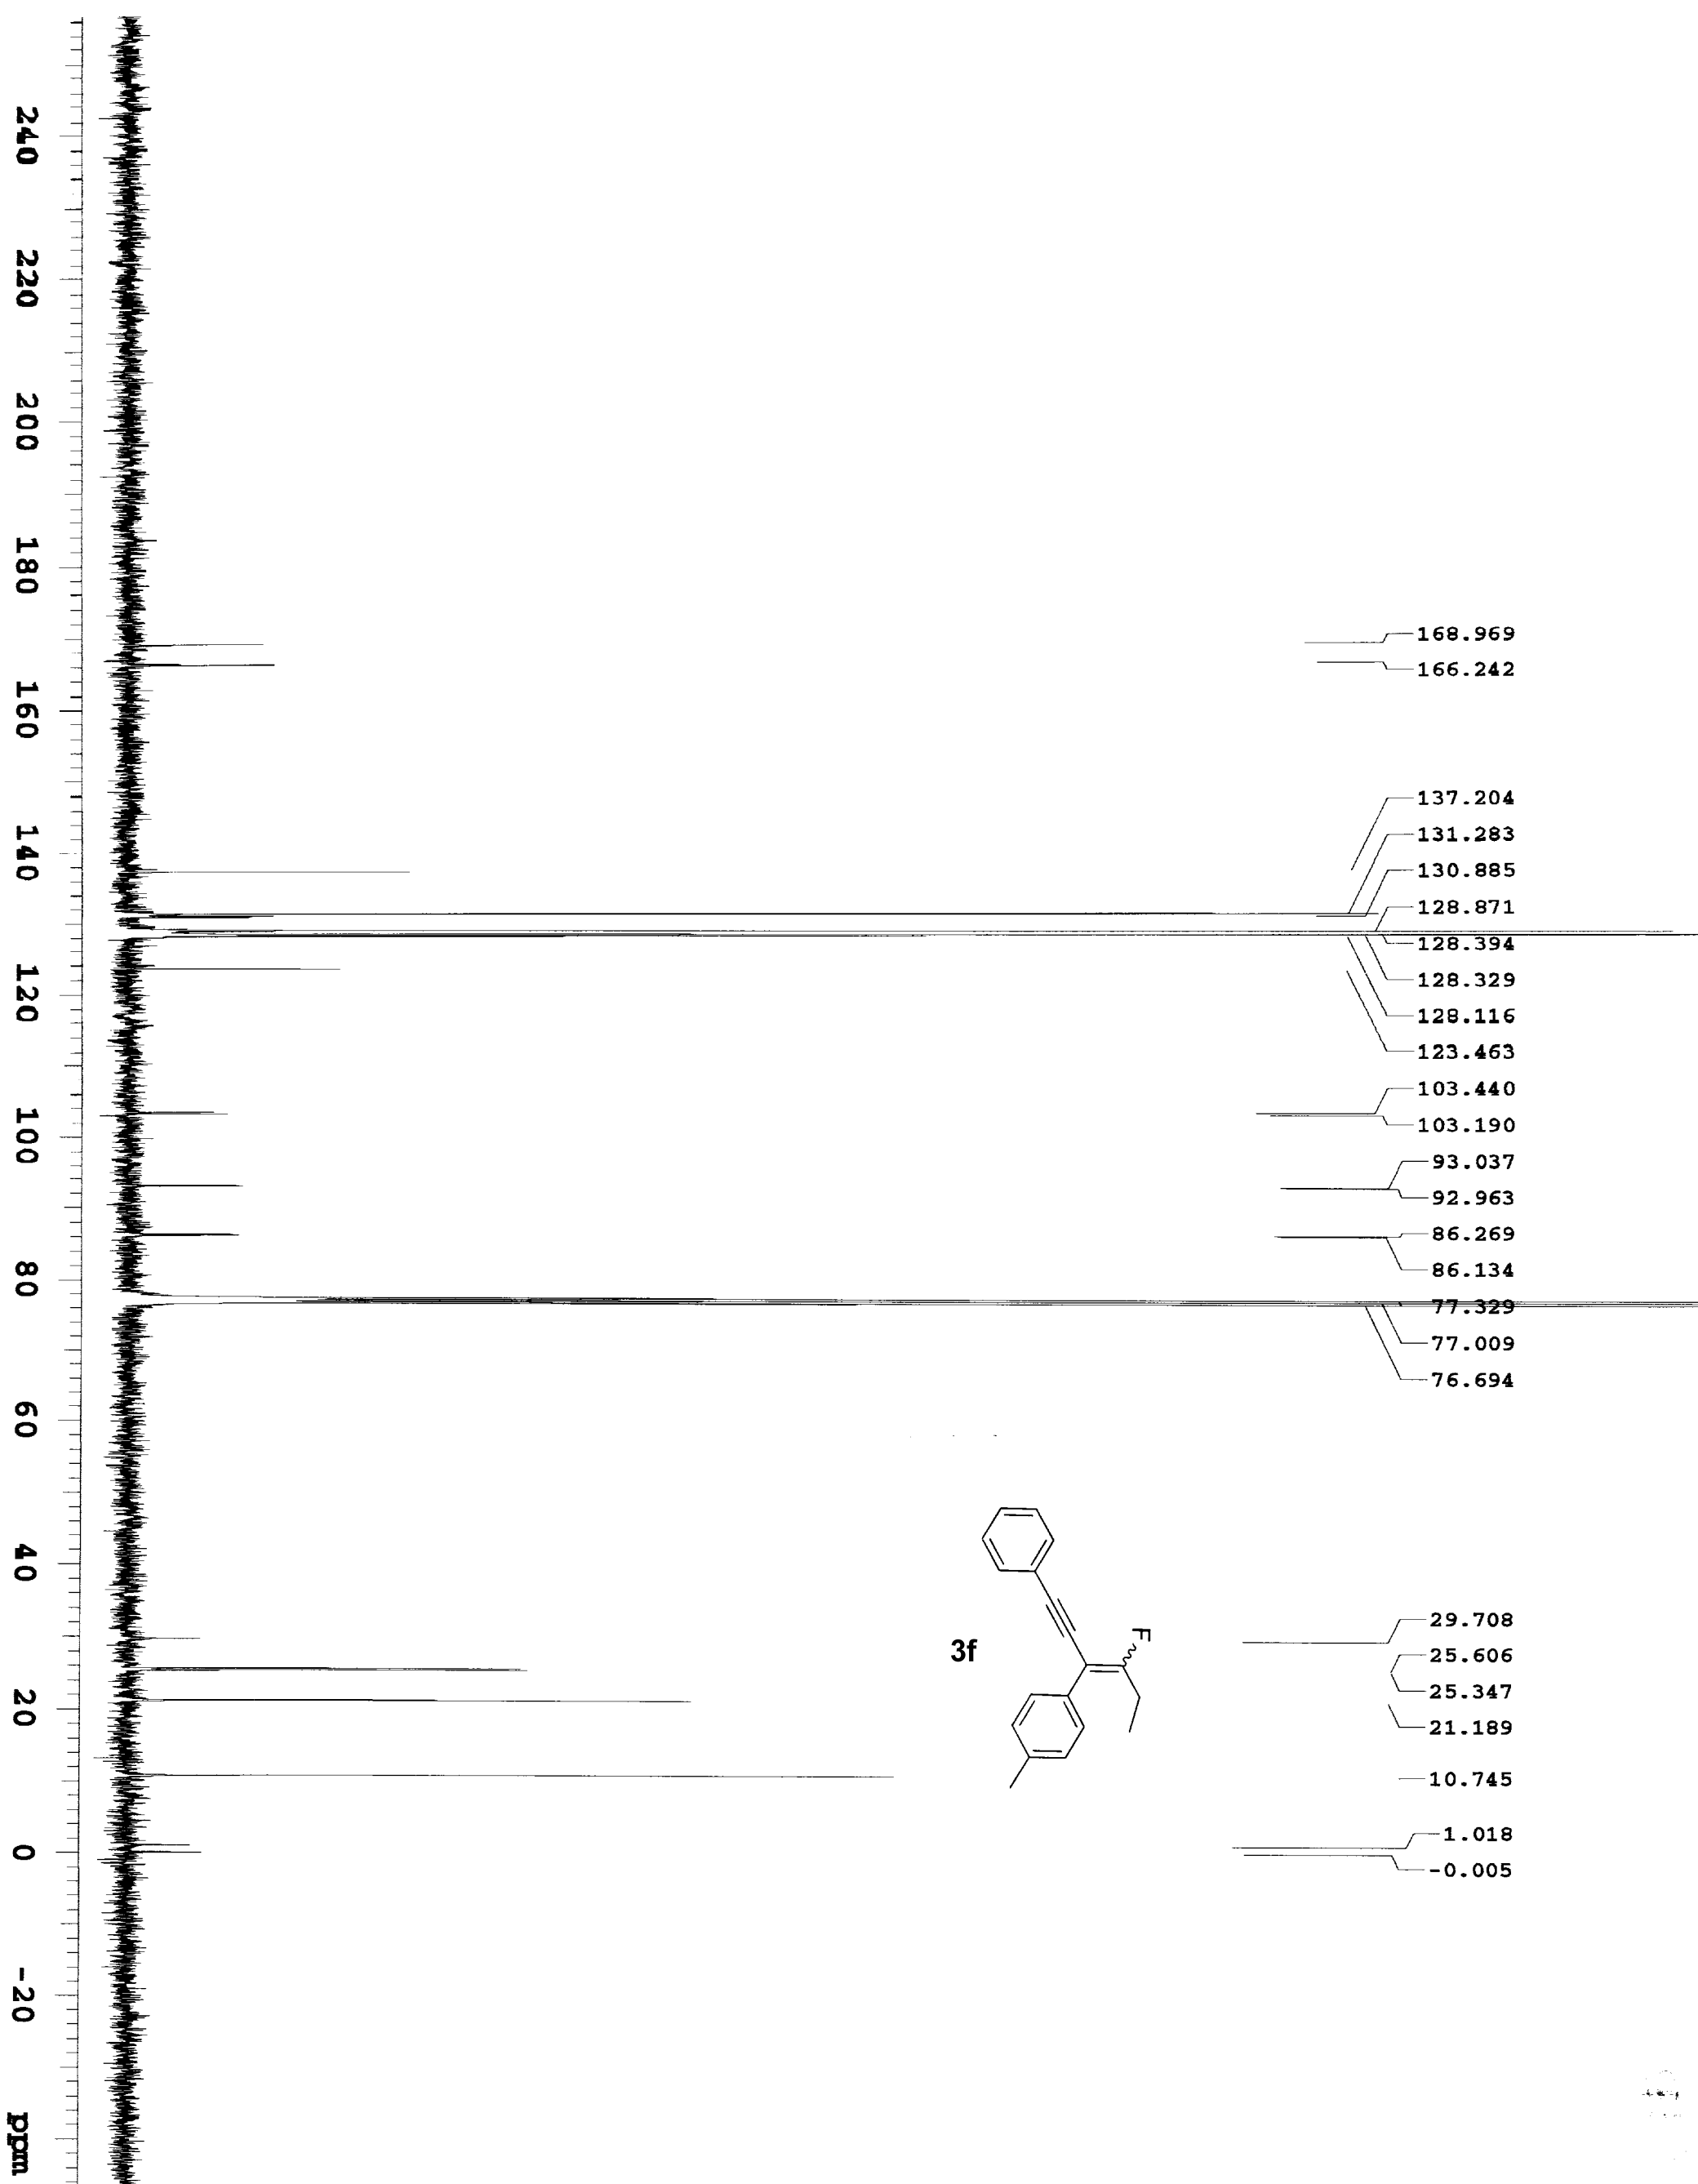



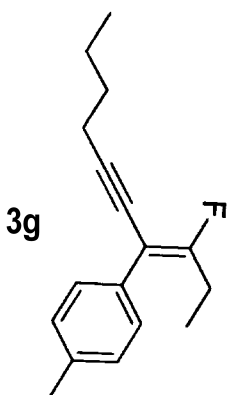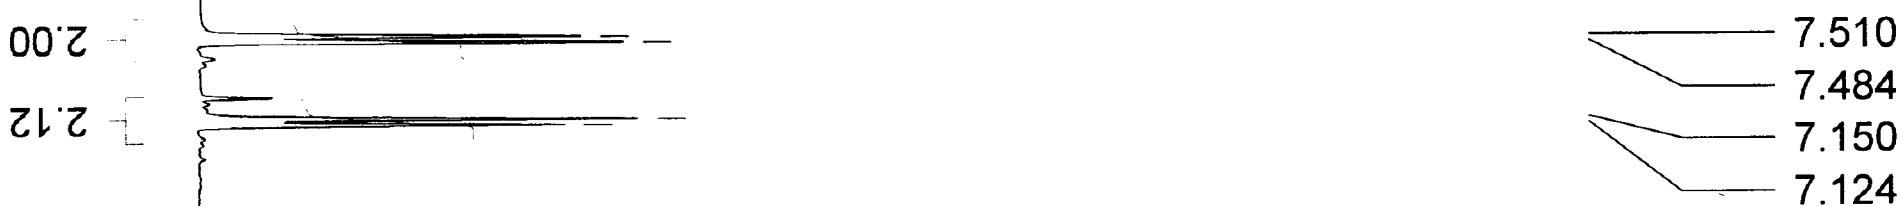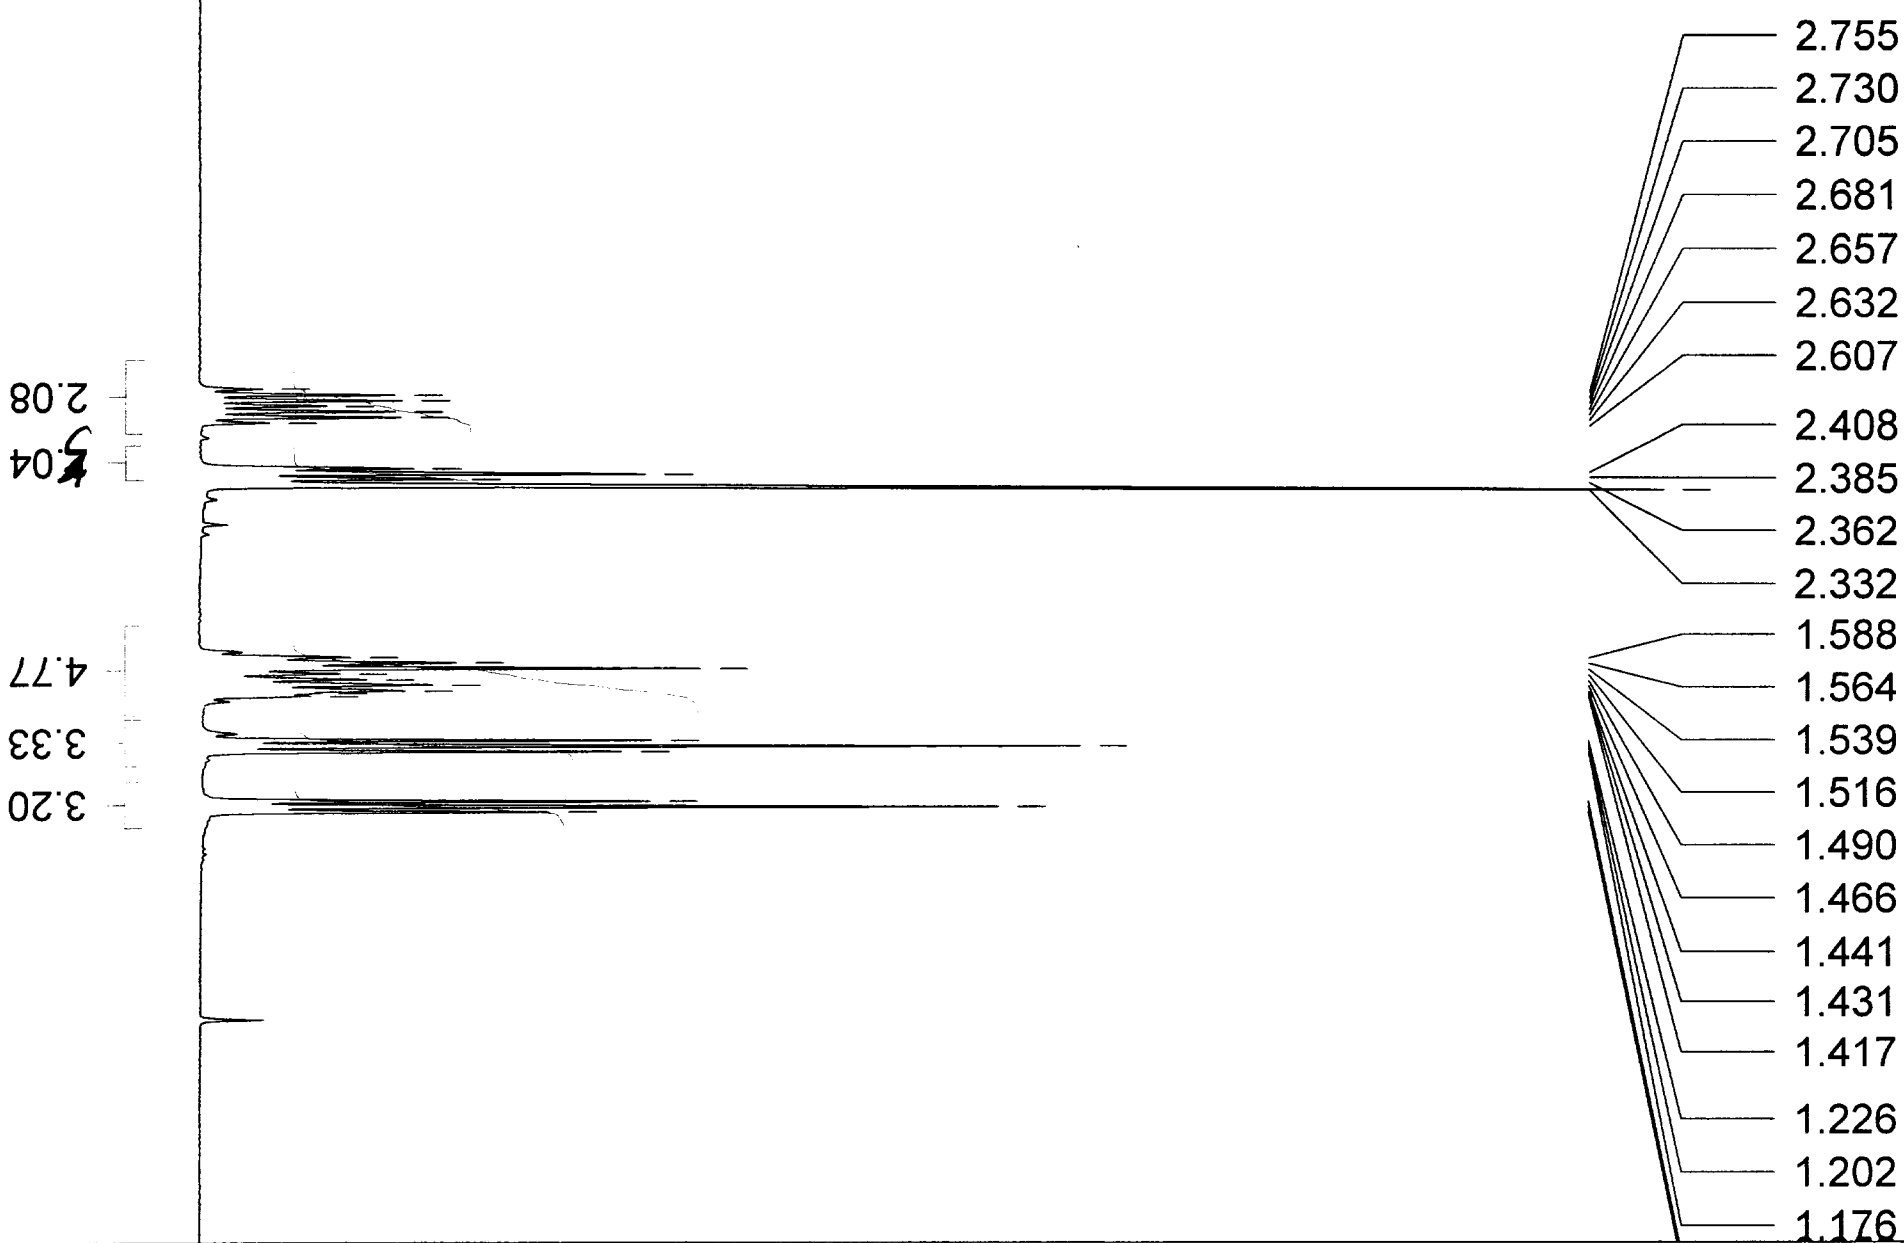

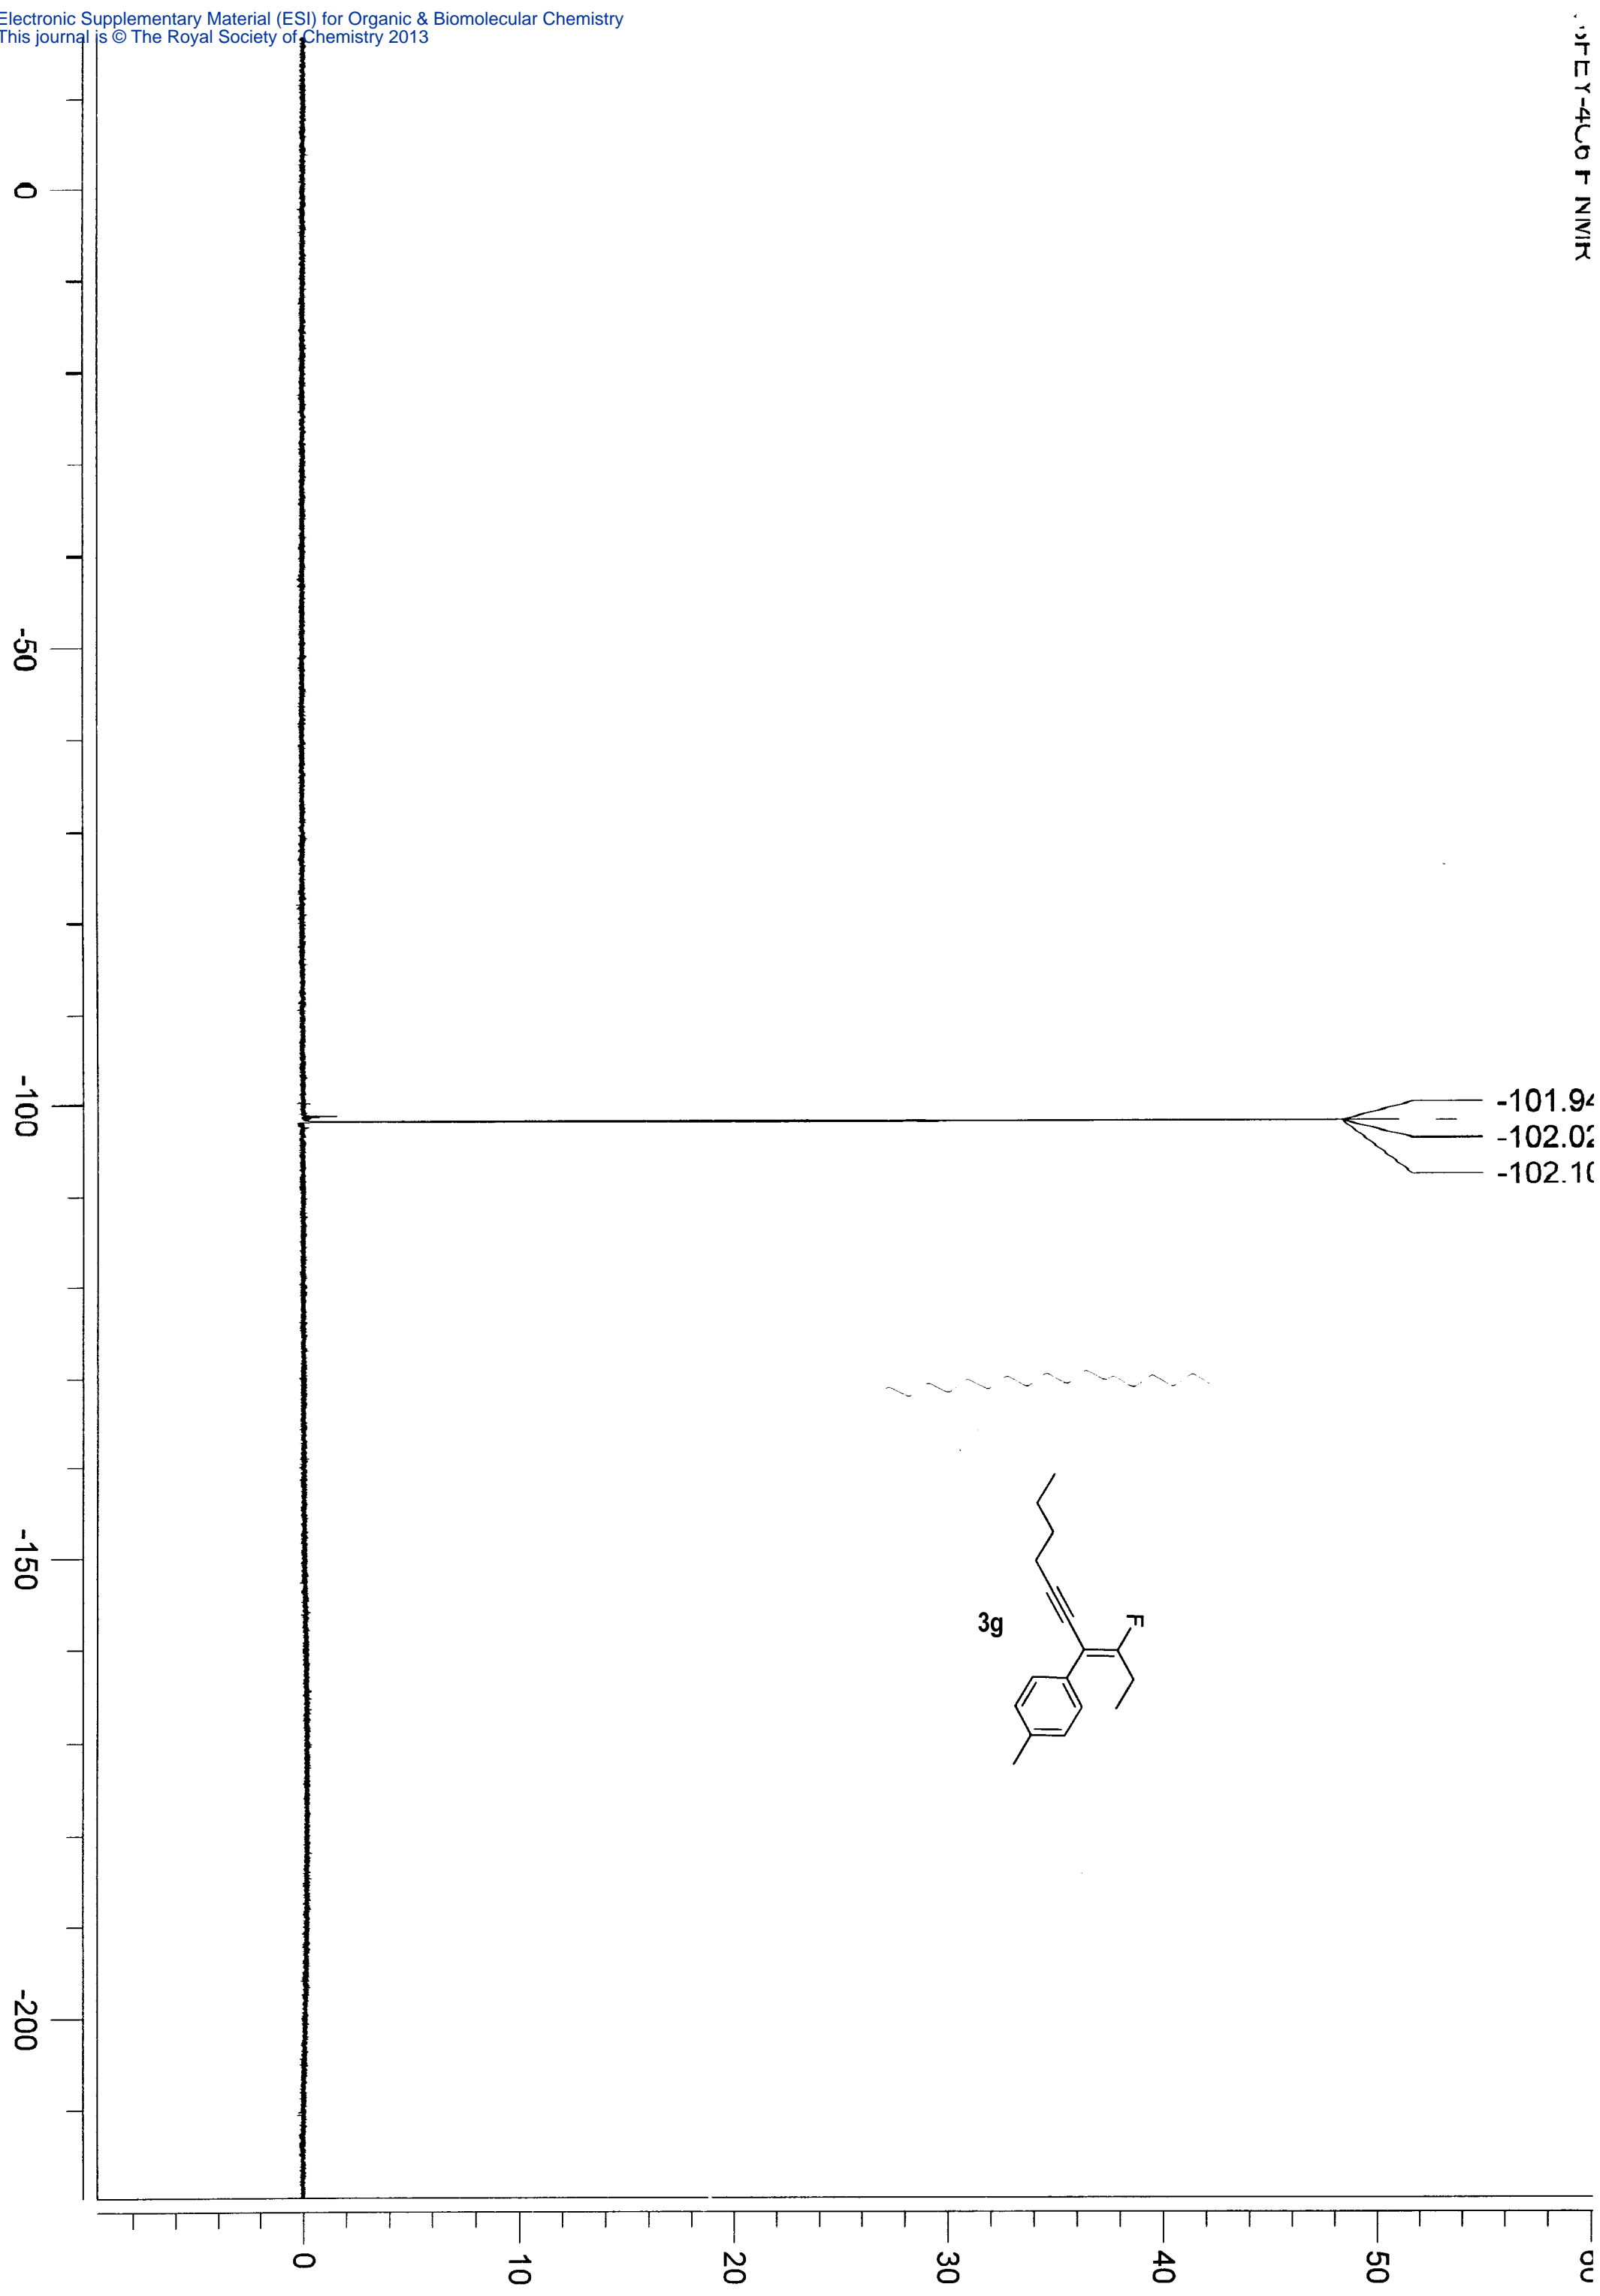

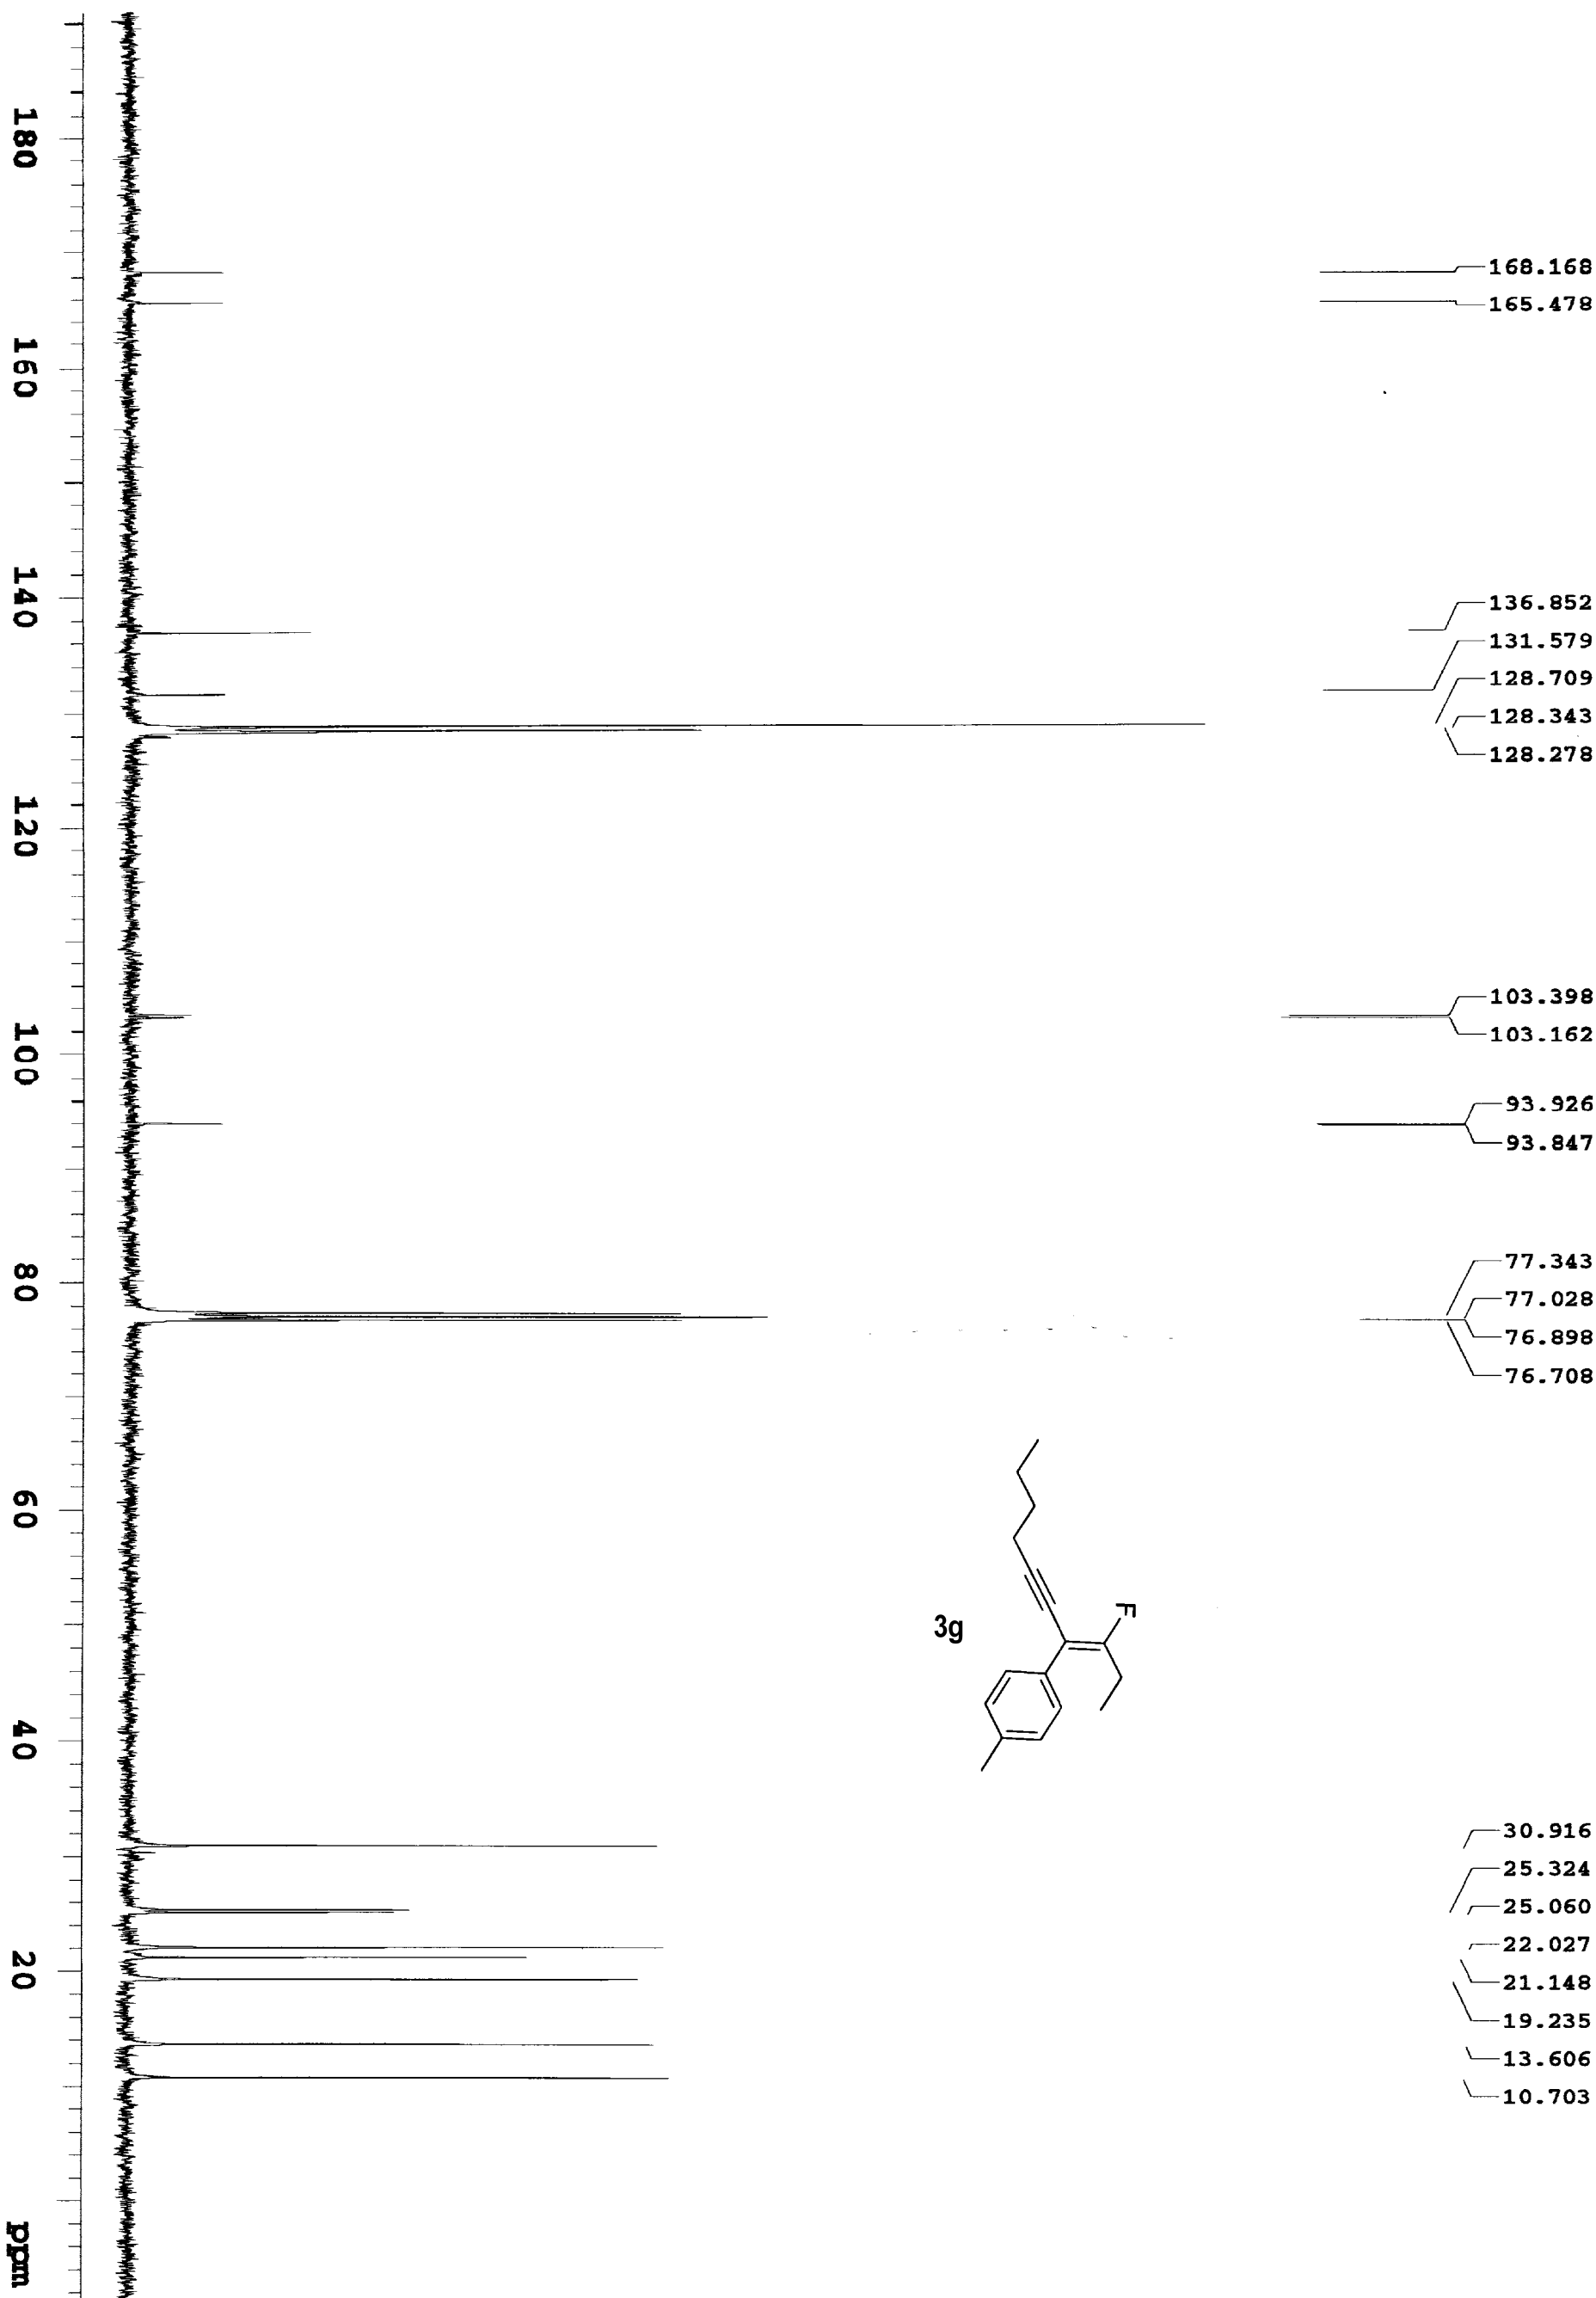

Page 10 of 10

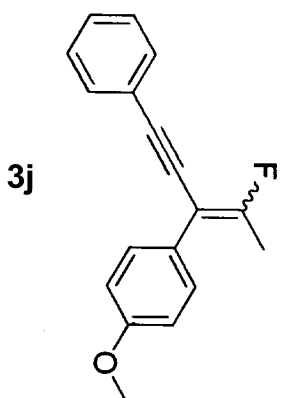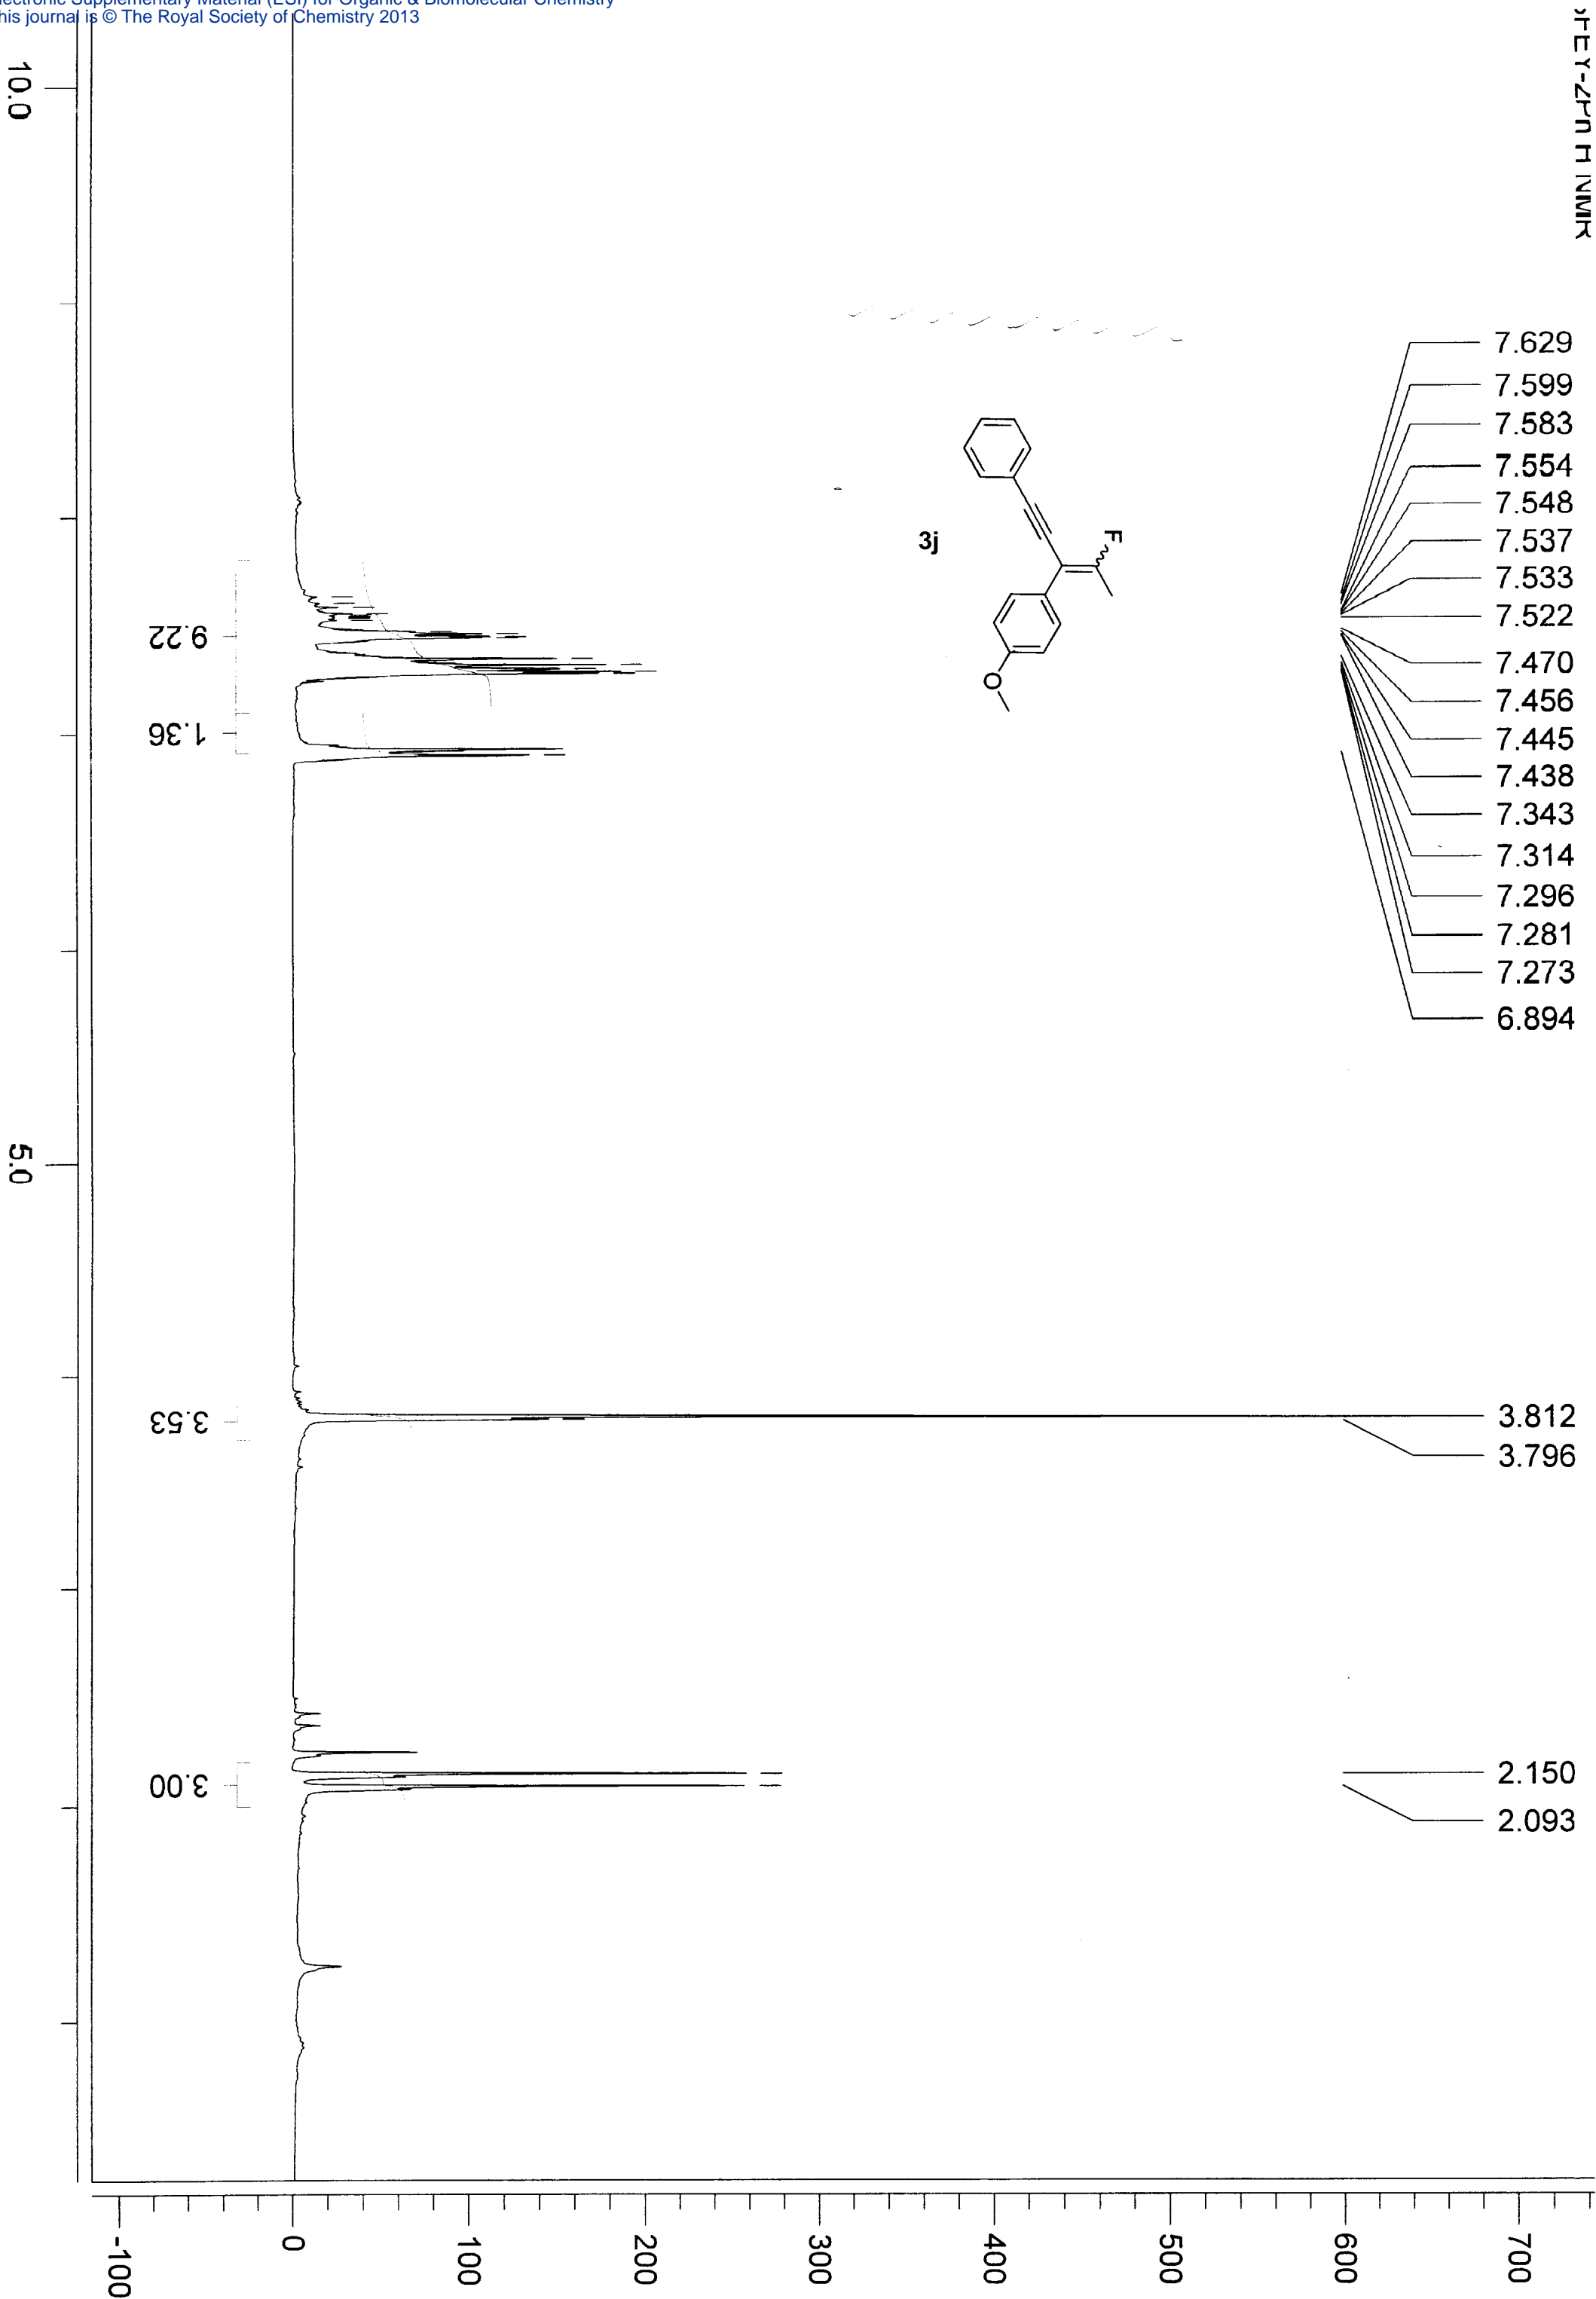

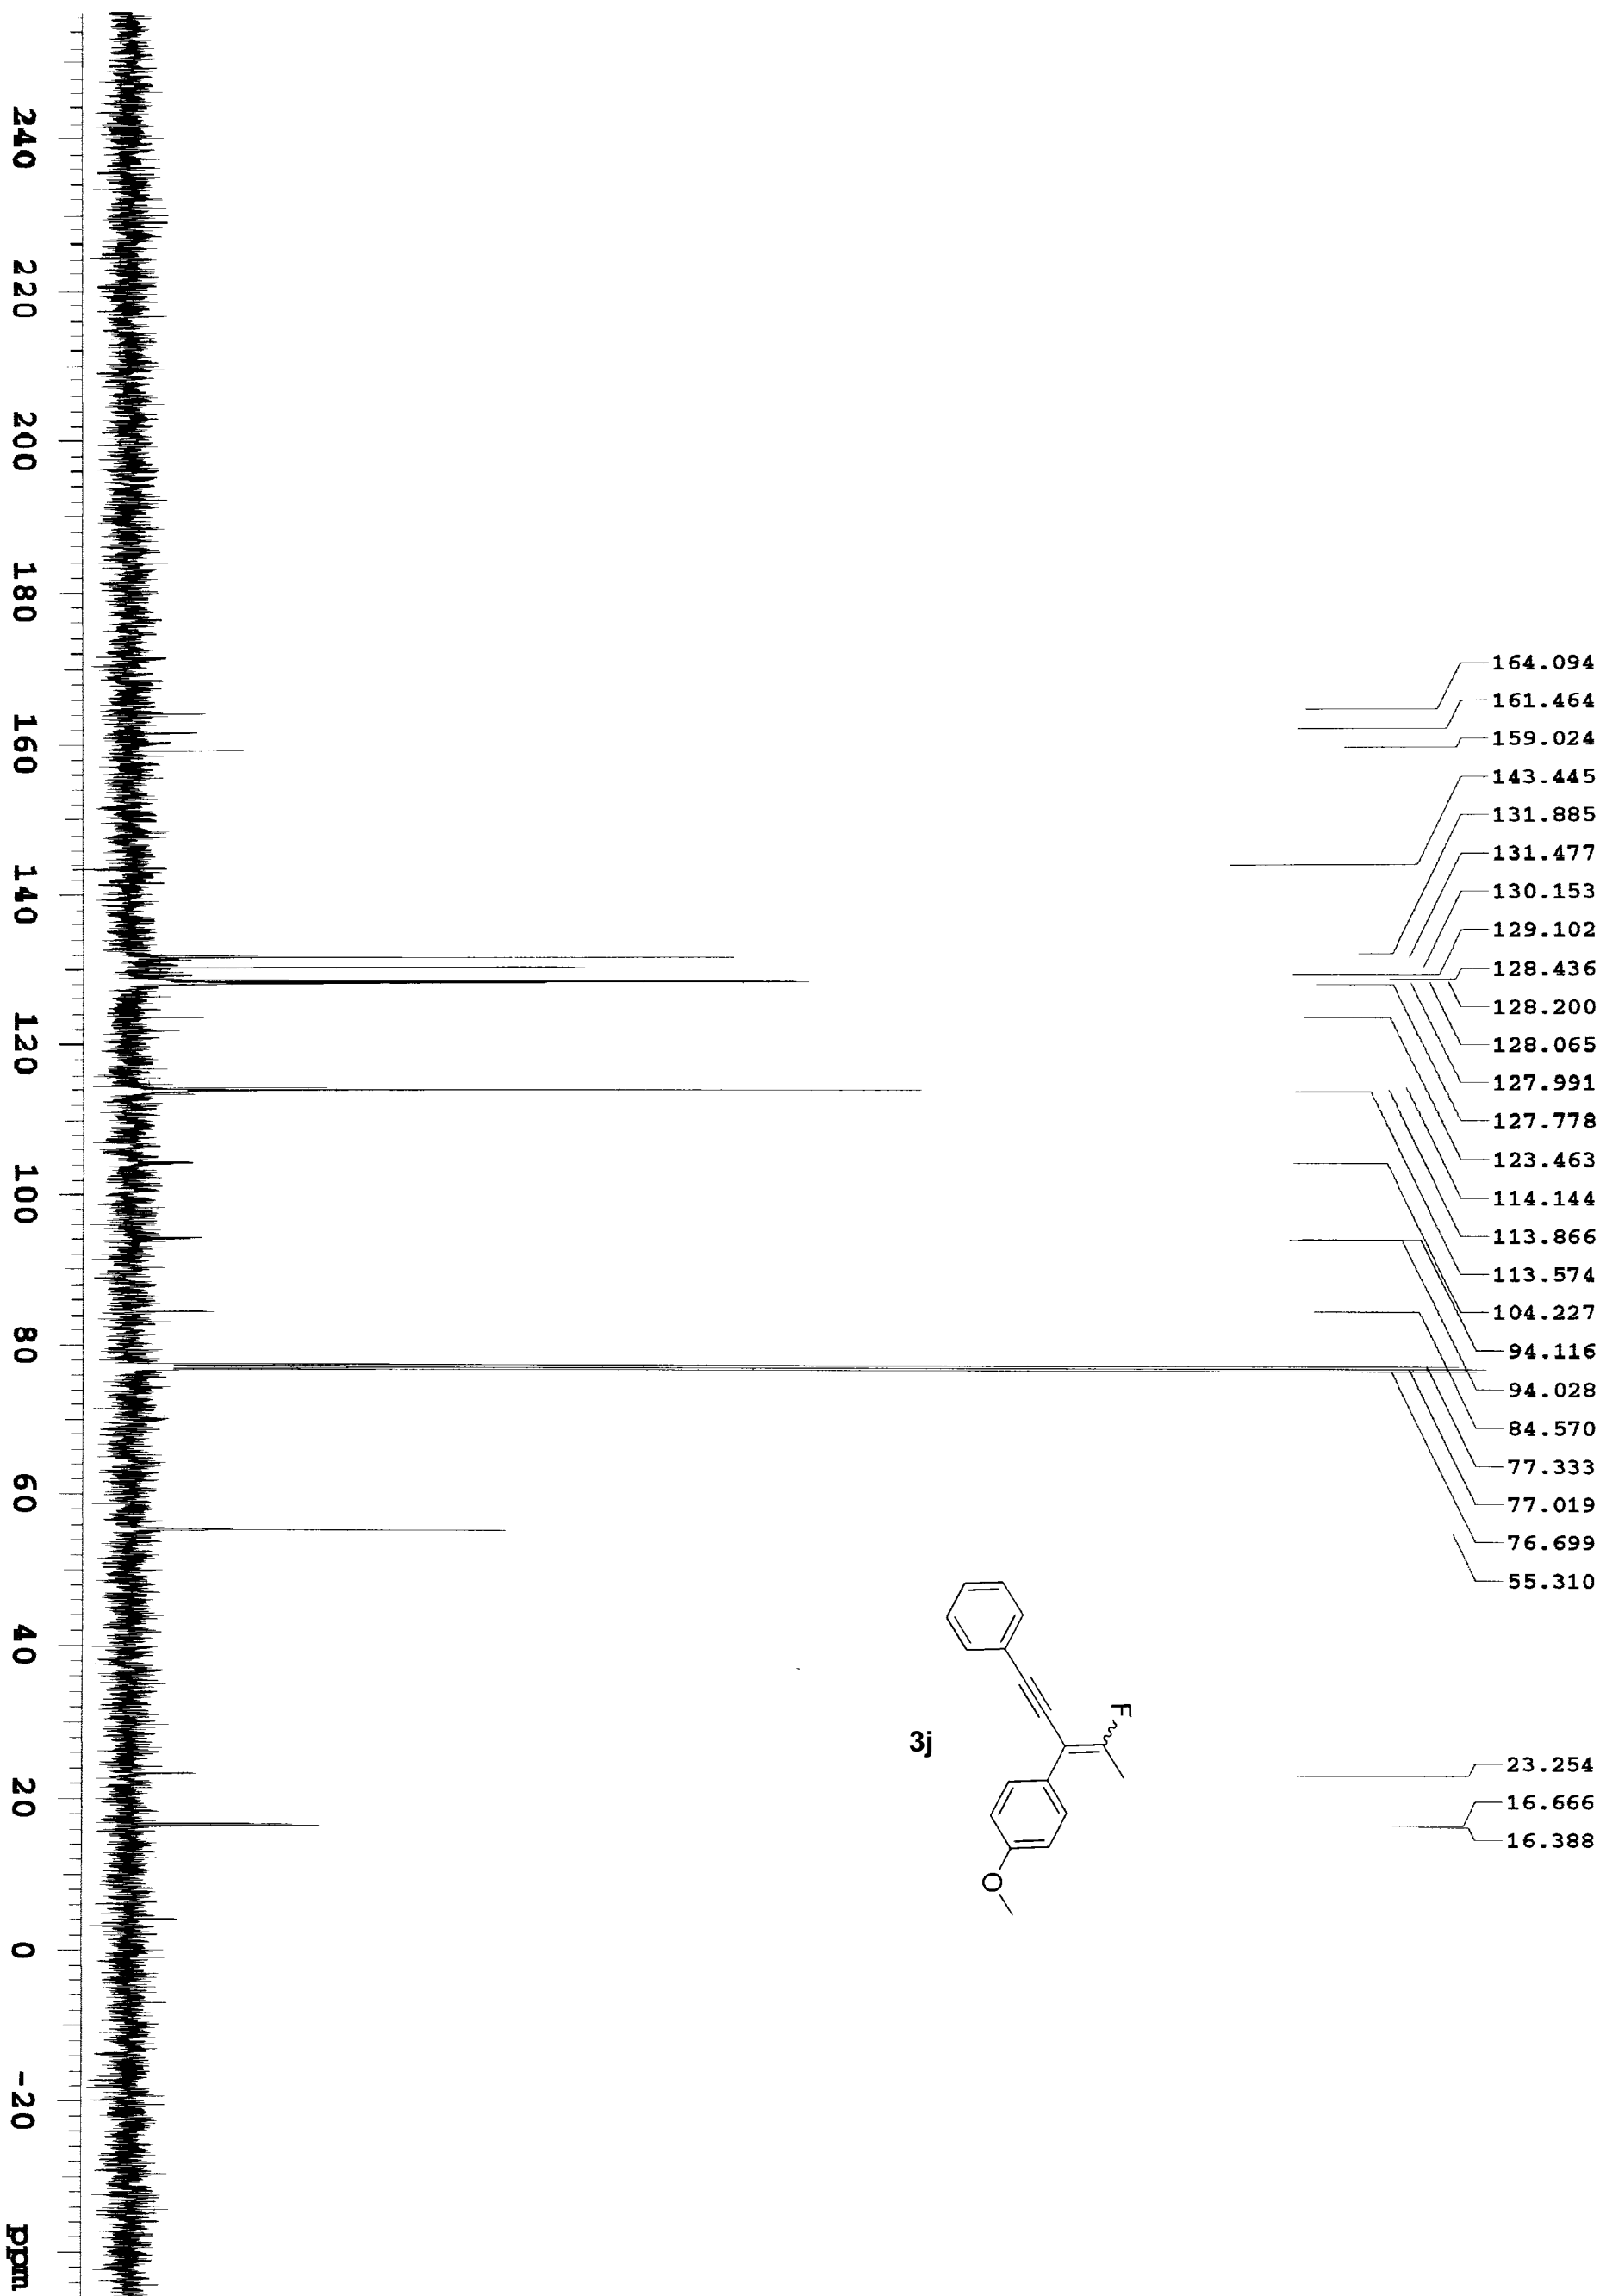



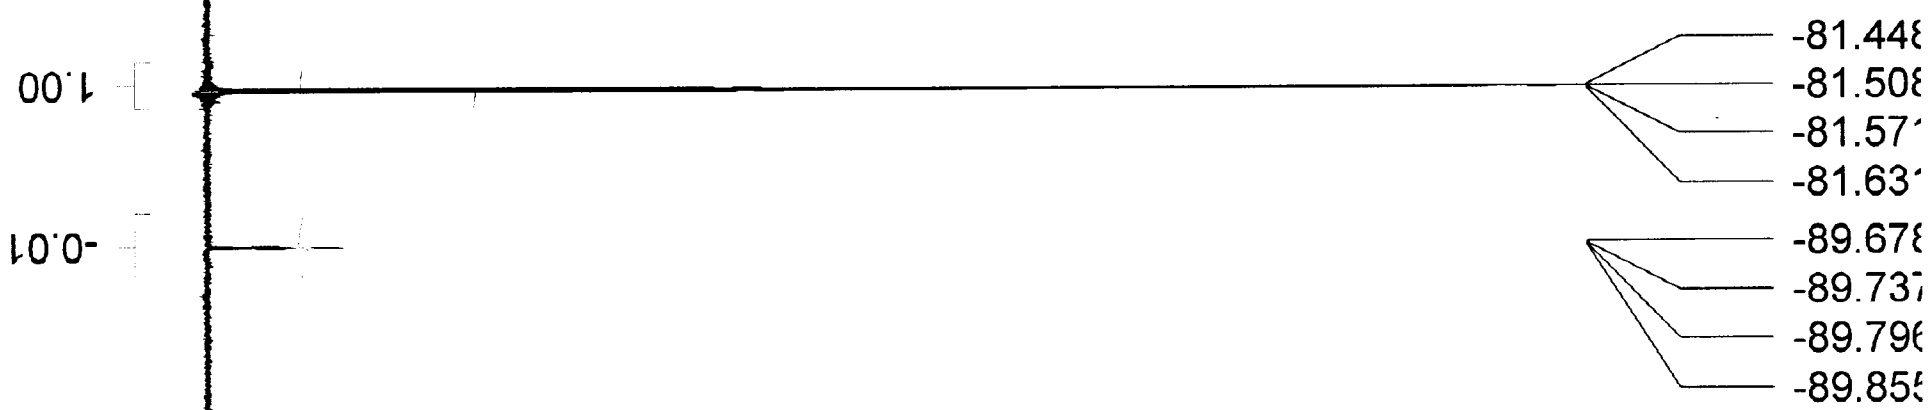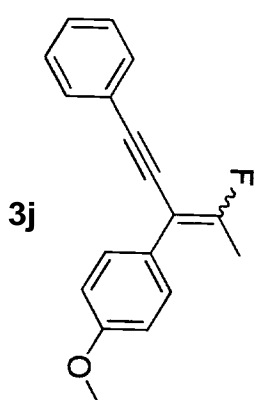

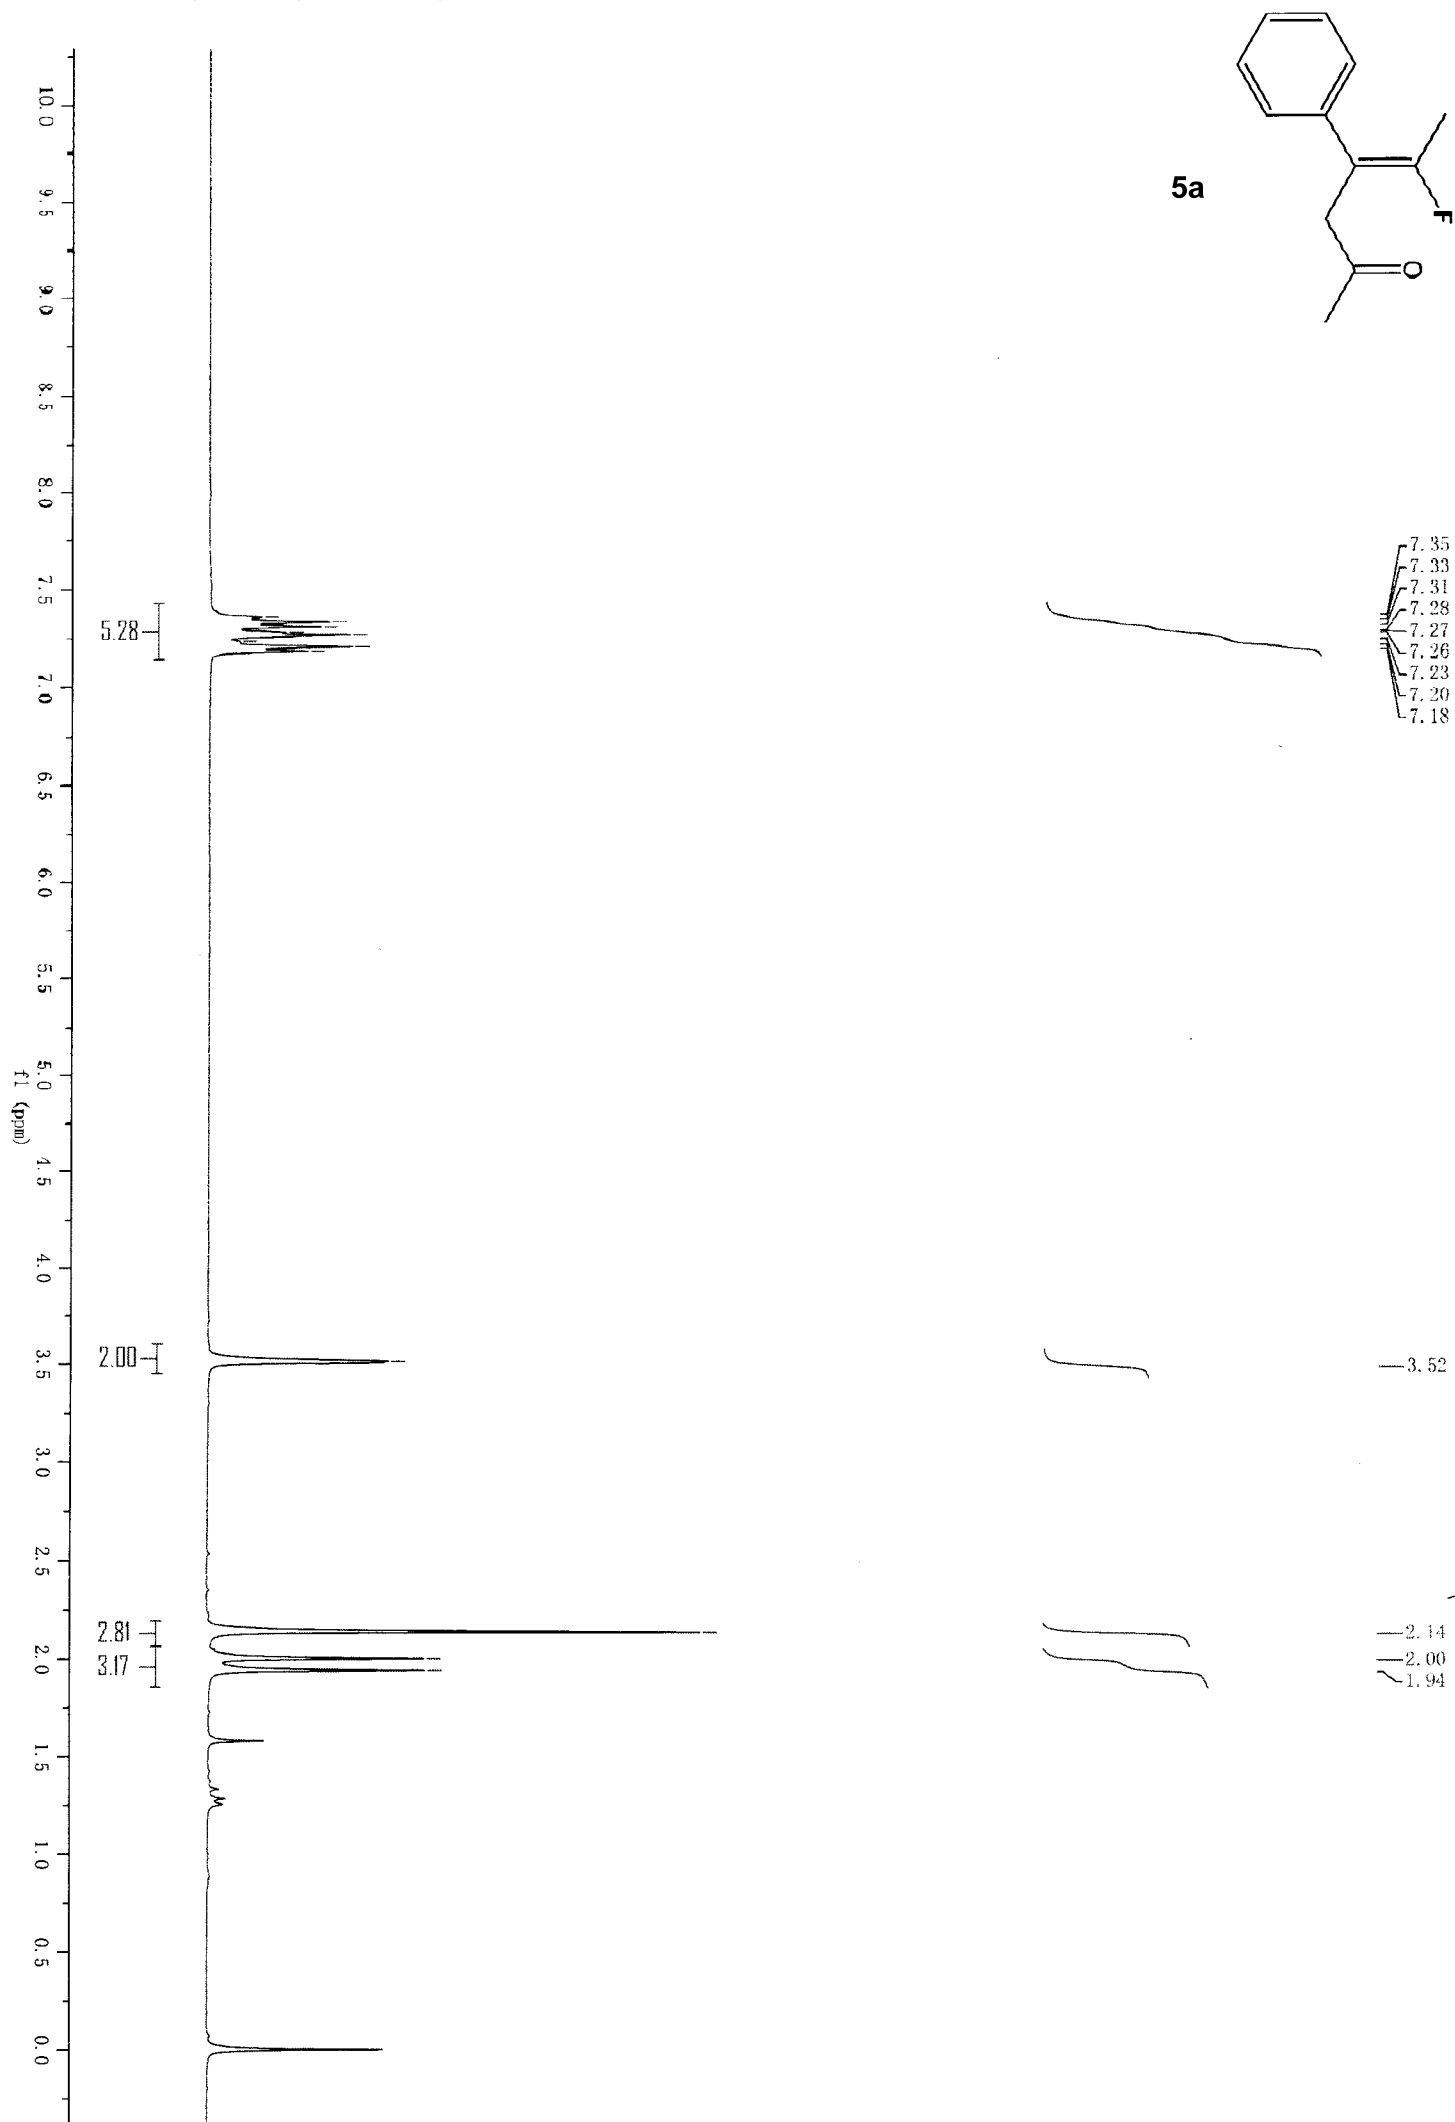

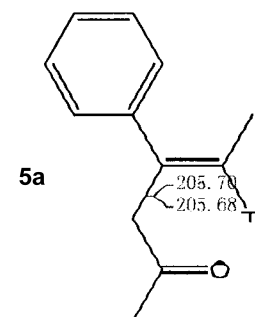

157.65  
155.14

138.27  
138.18

128.75  
128.72  
128.39  
127.15

112.88  
112.69

45.39  
45.33

29.32

15.86  
15.56

0.97

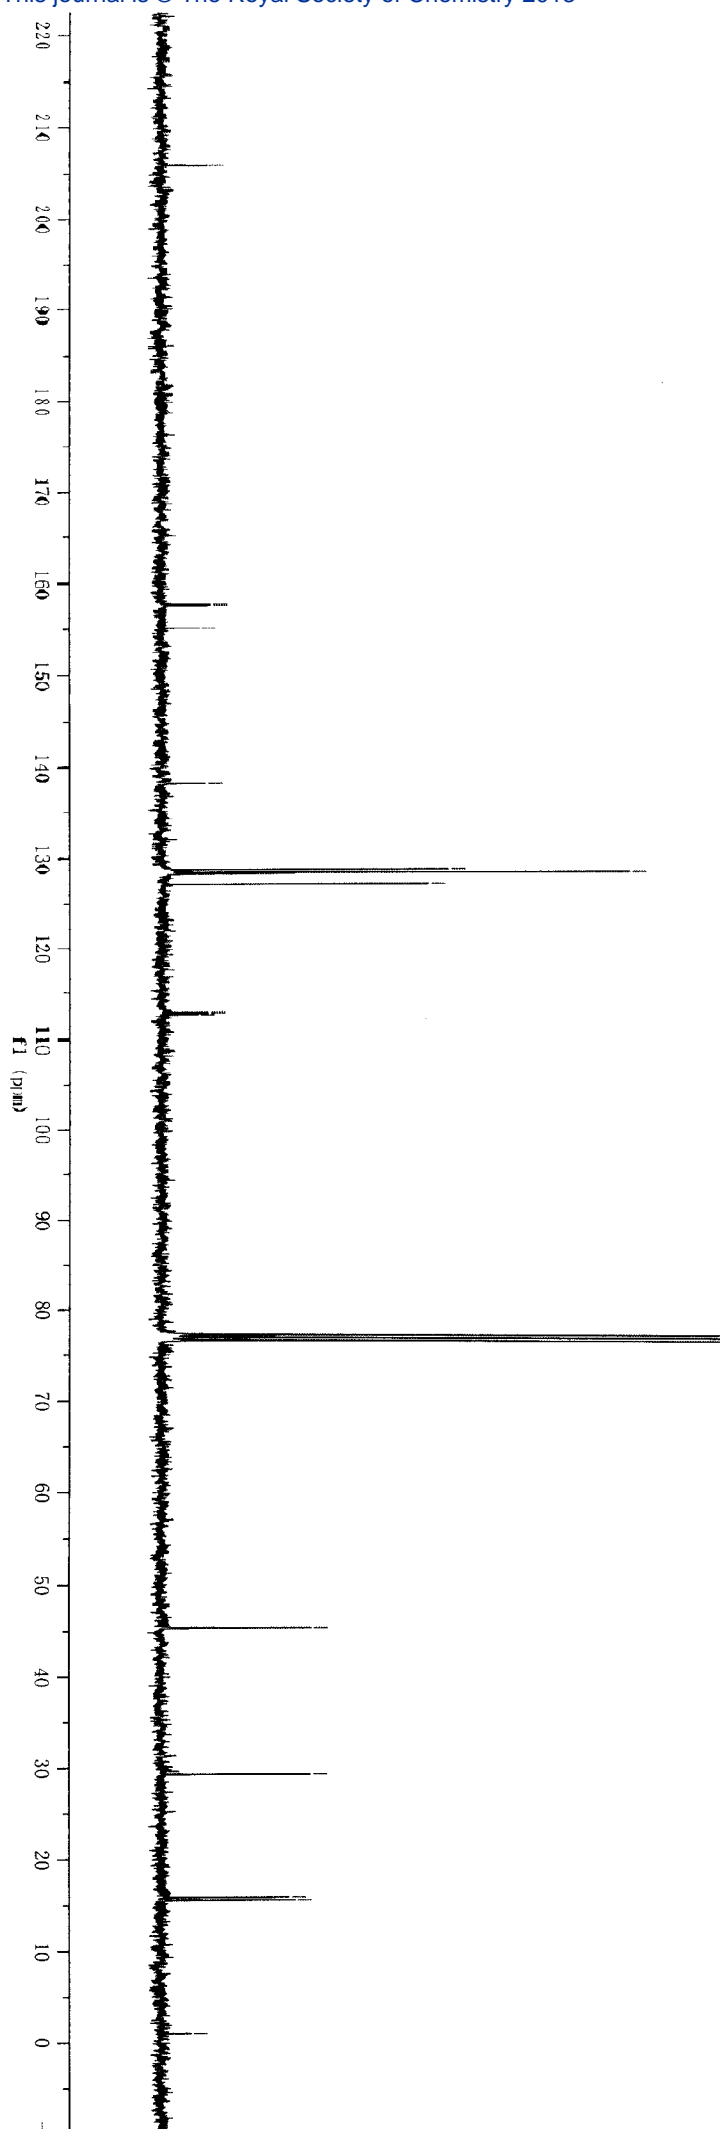

5a

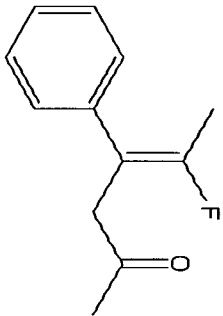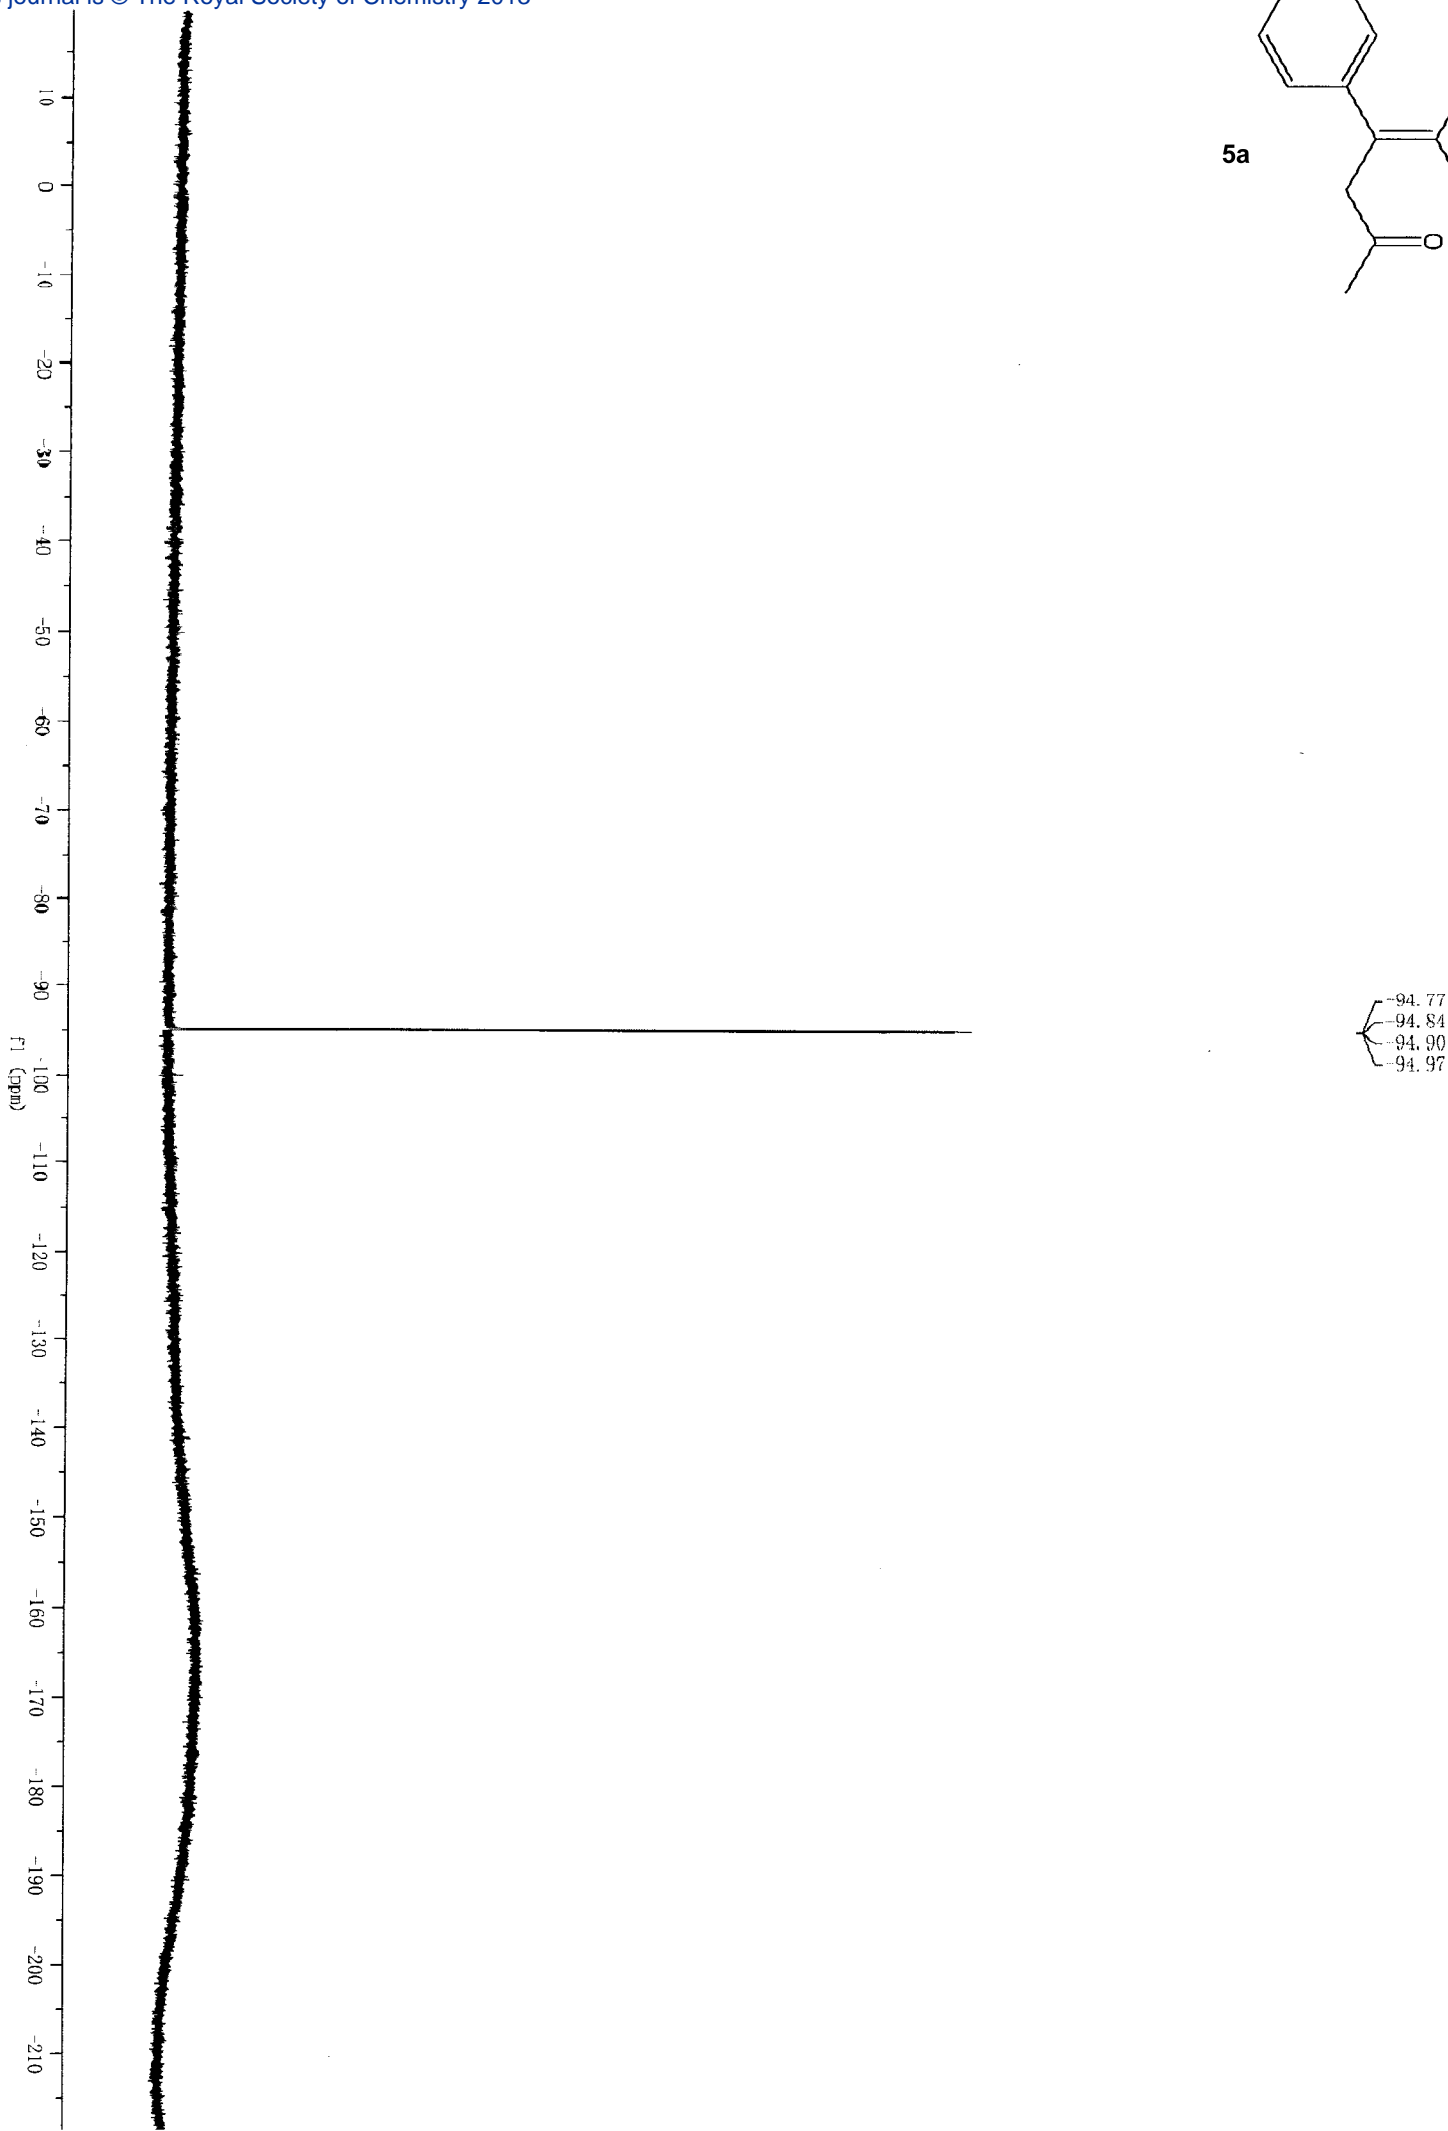

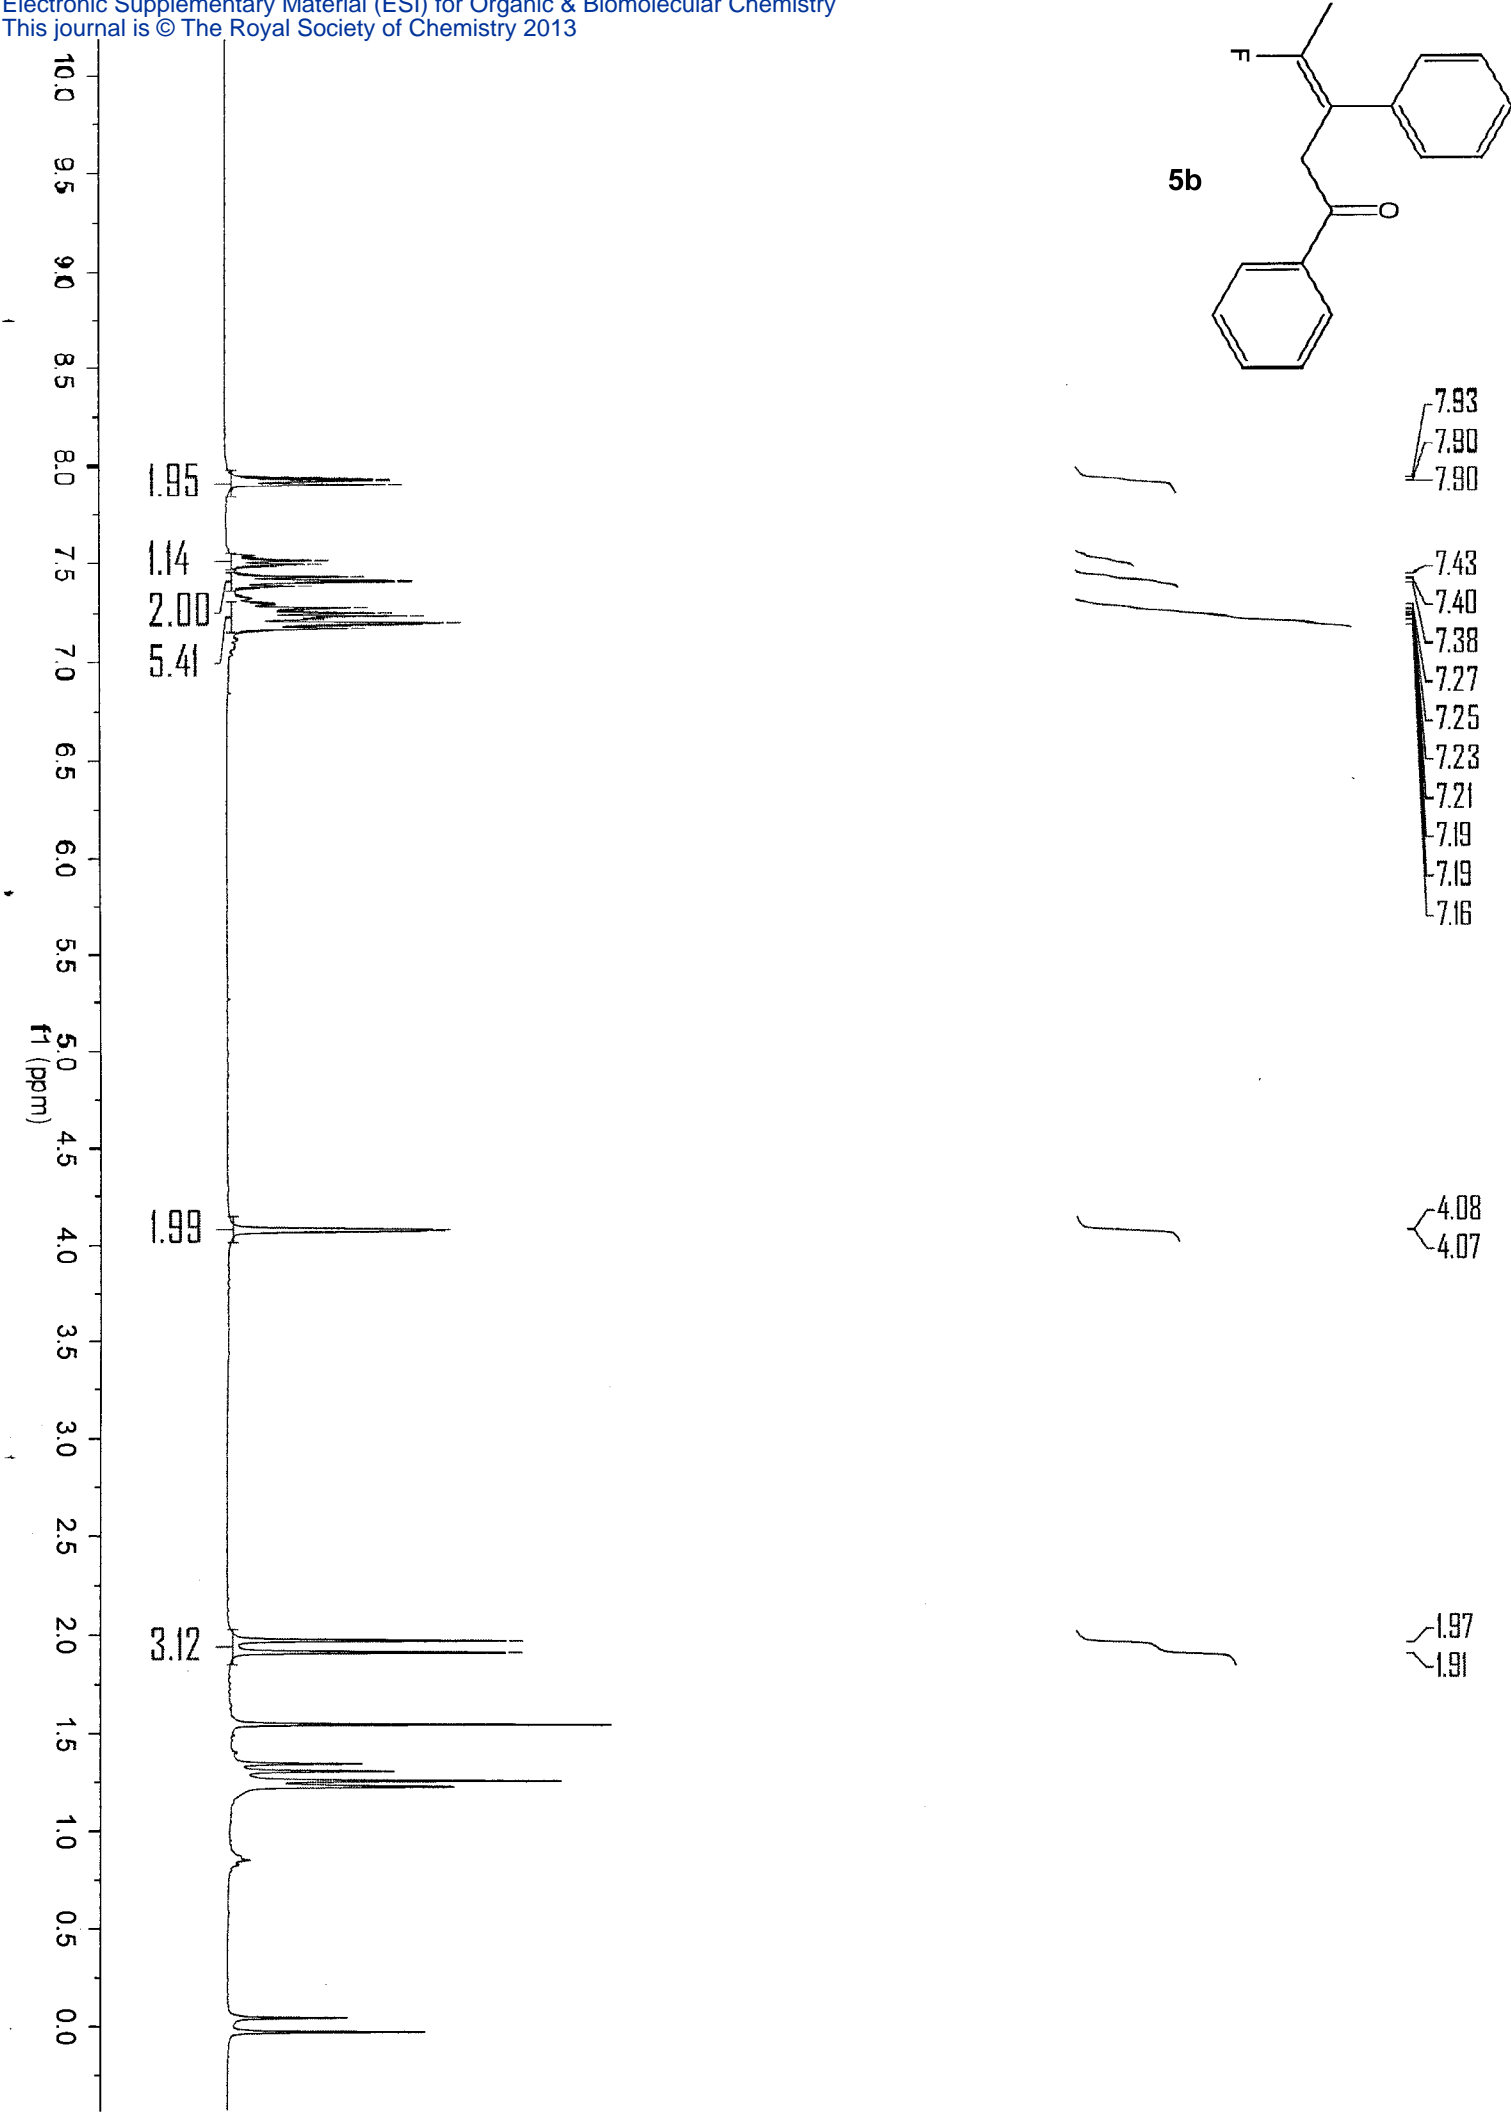

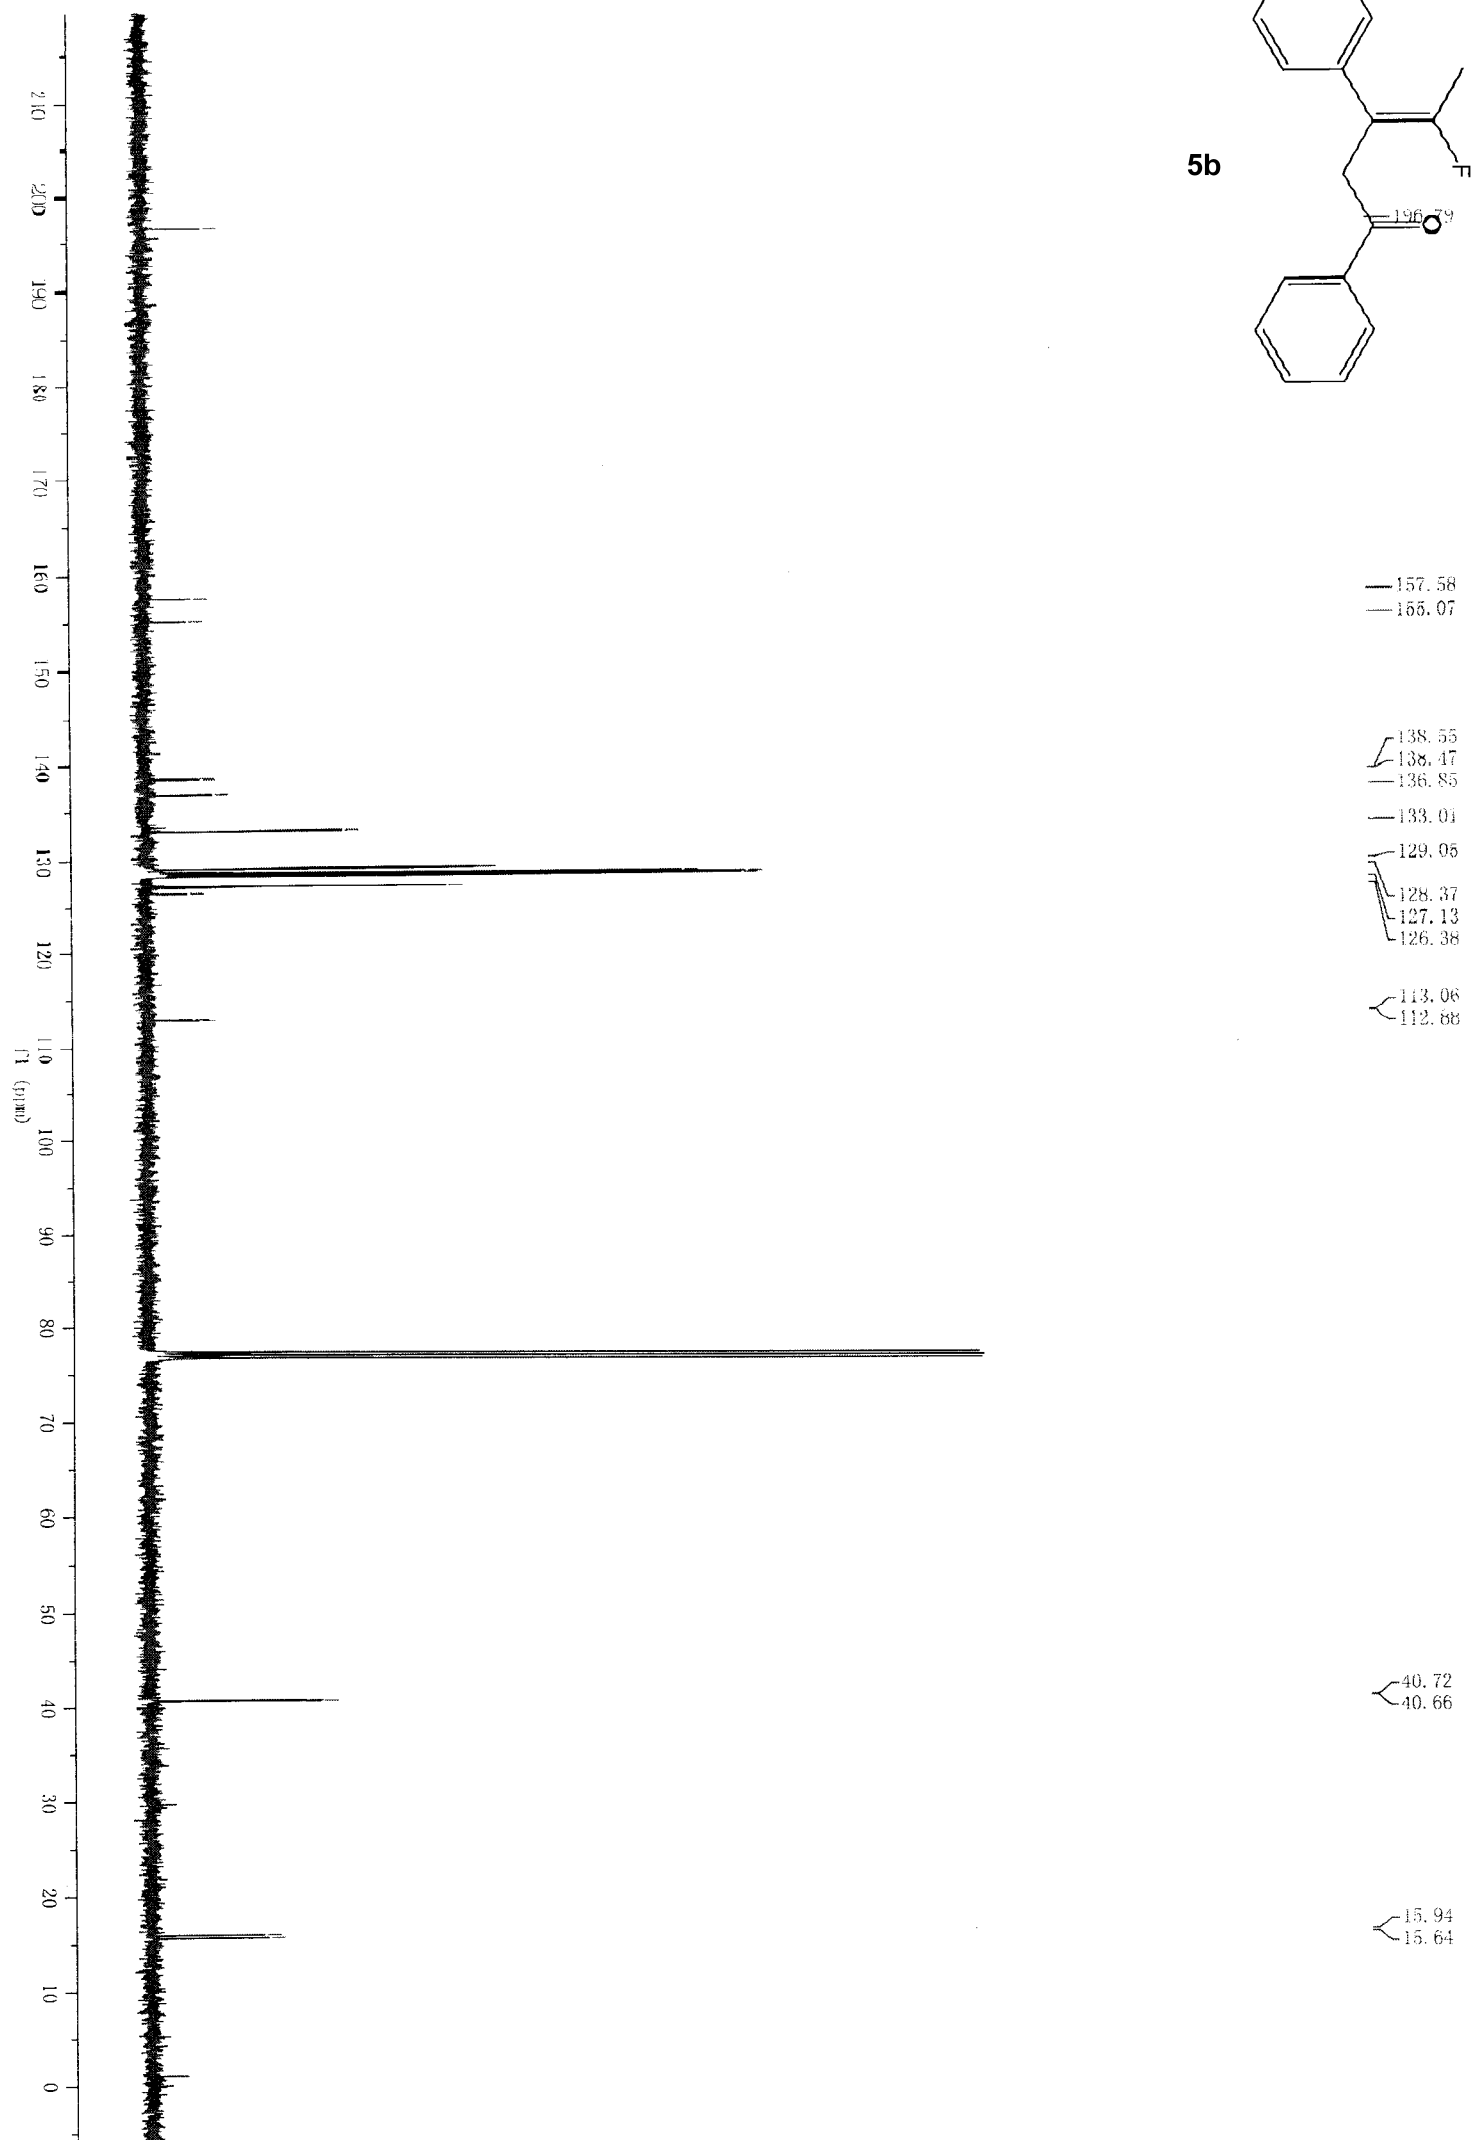

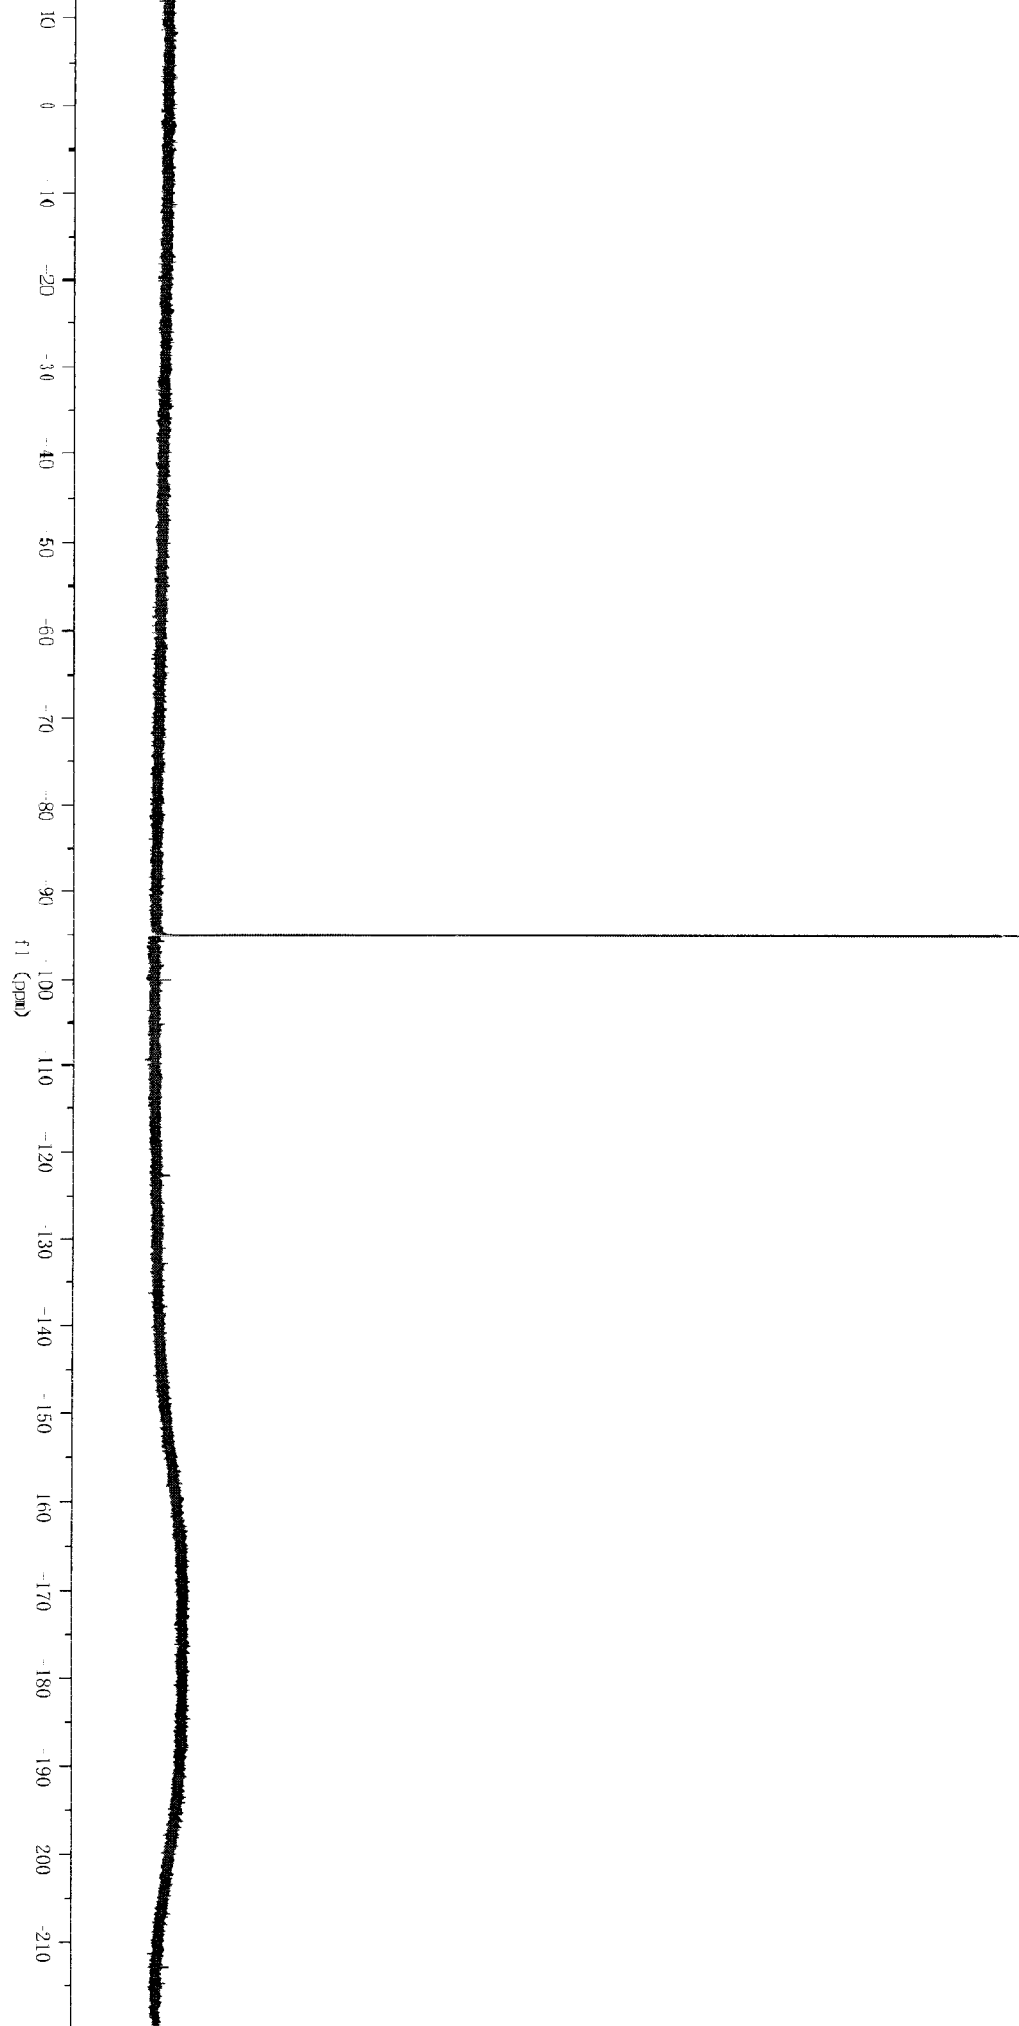

5b

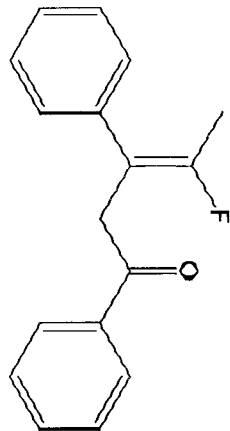

95.05  
95.11  
95.18  
95.24

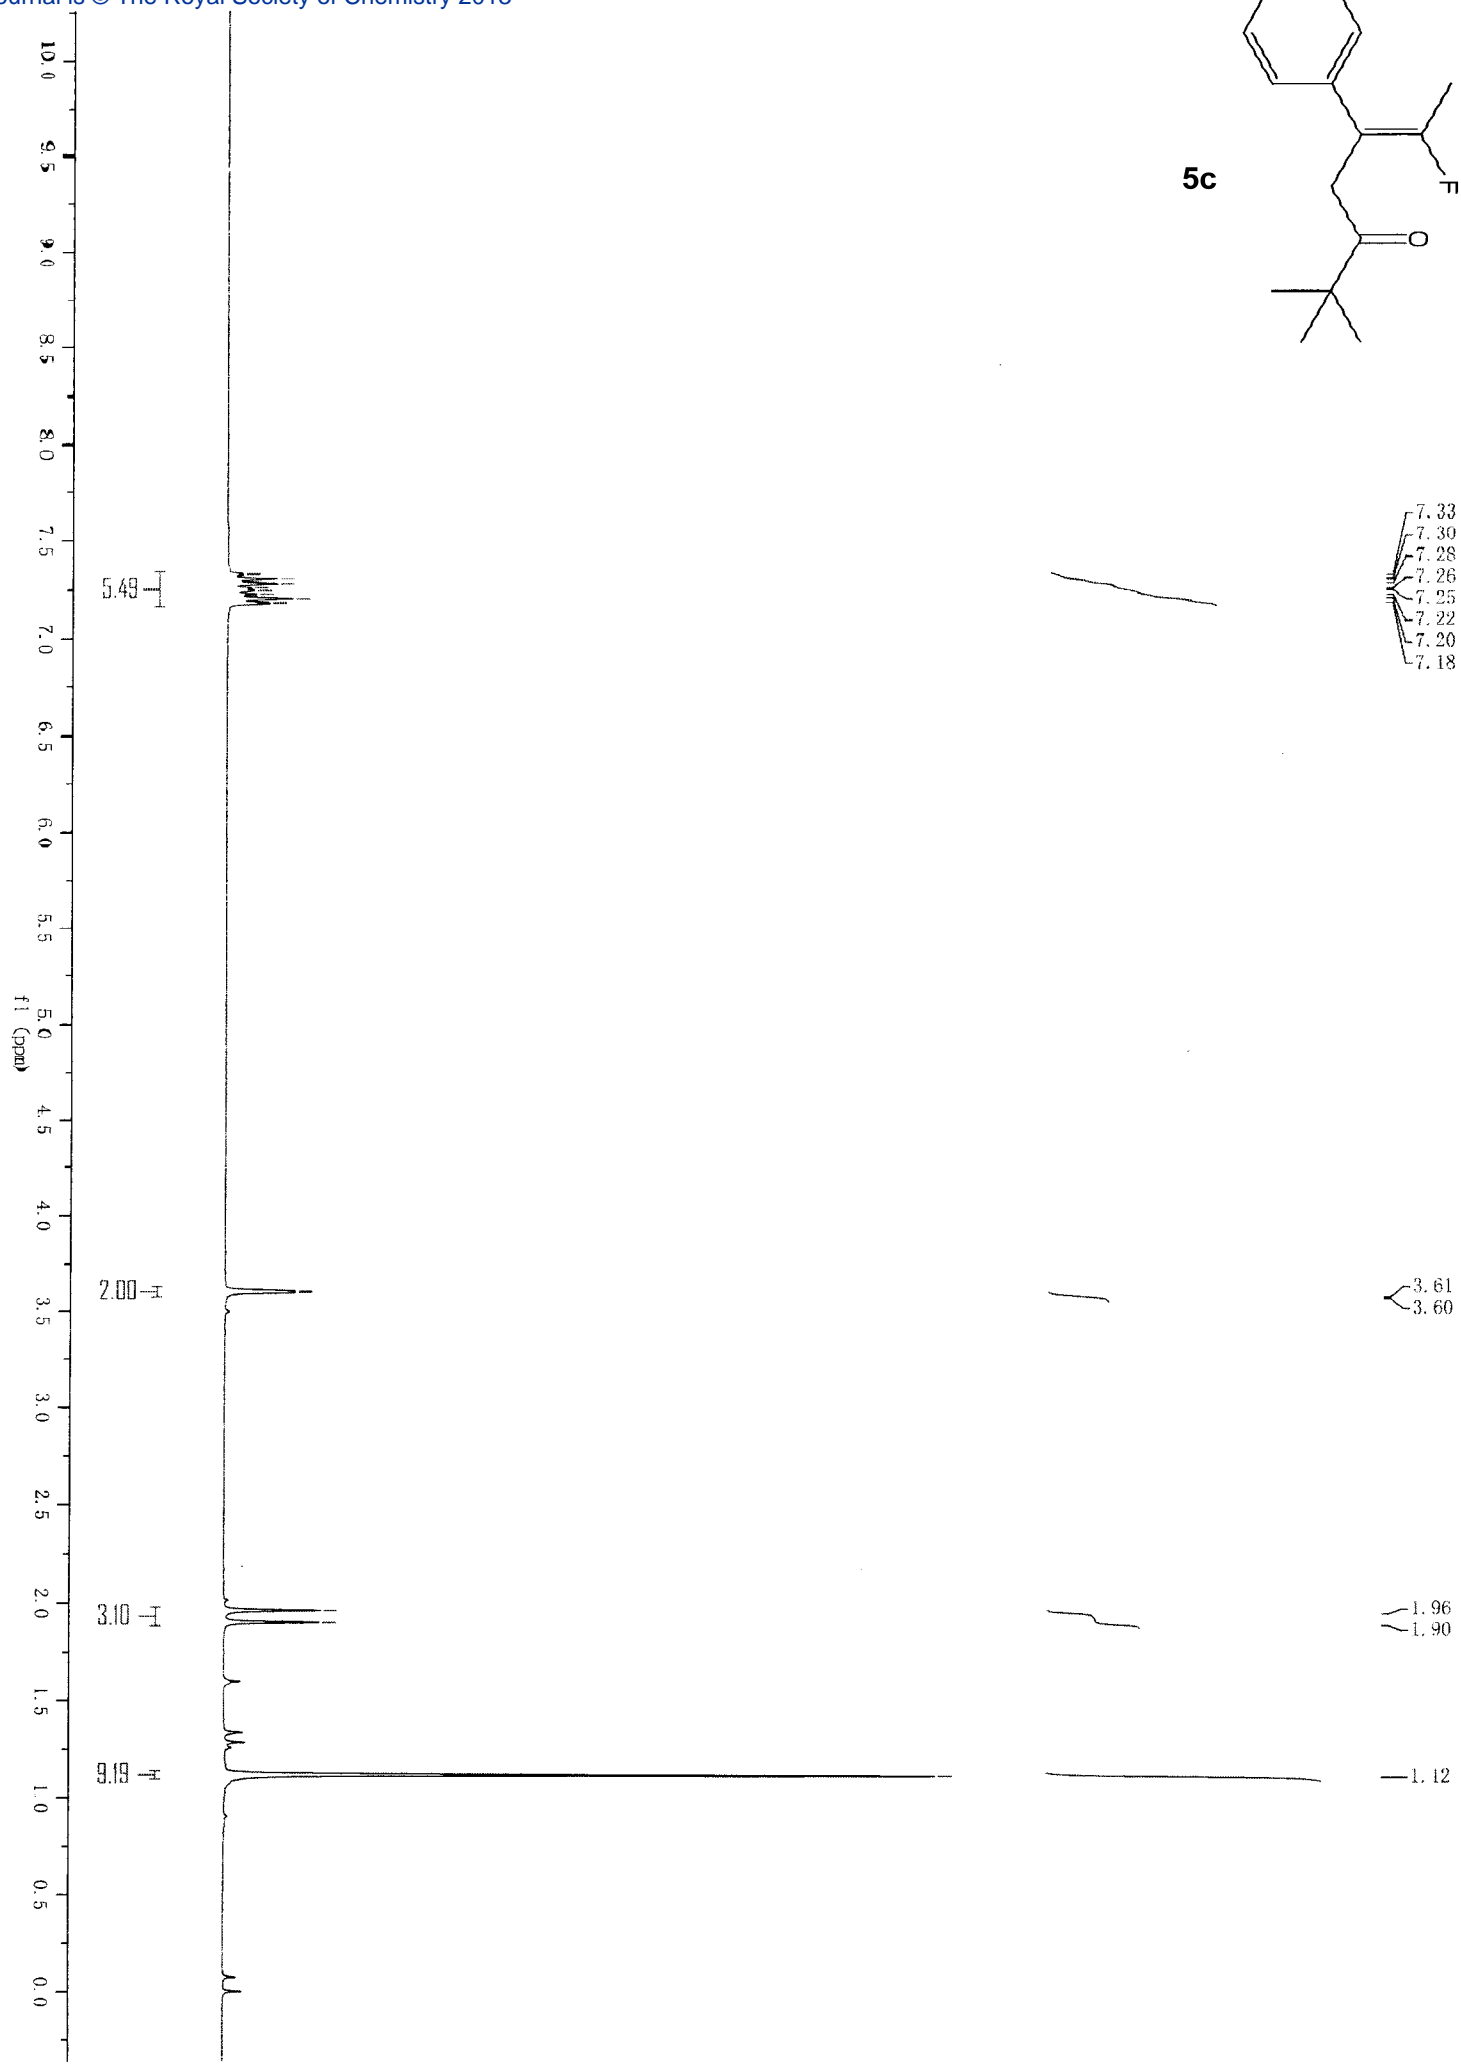



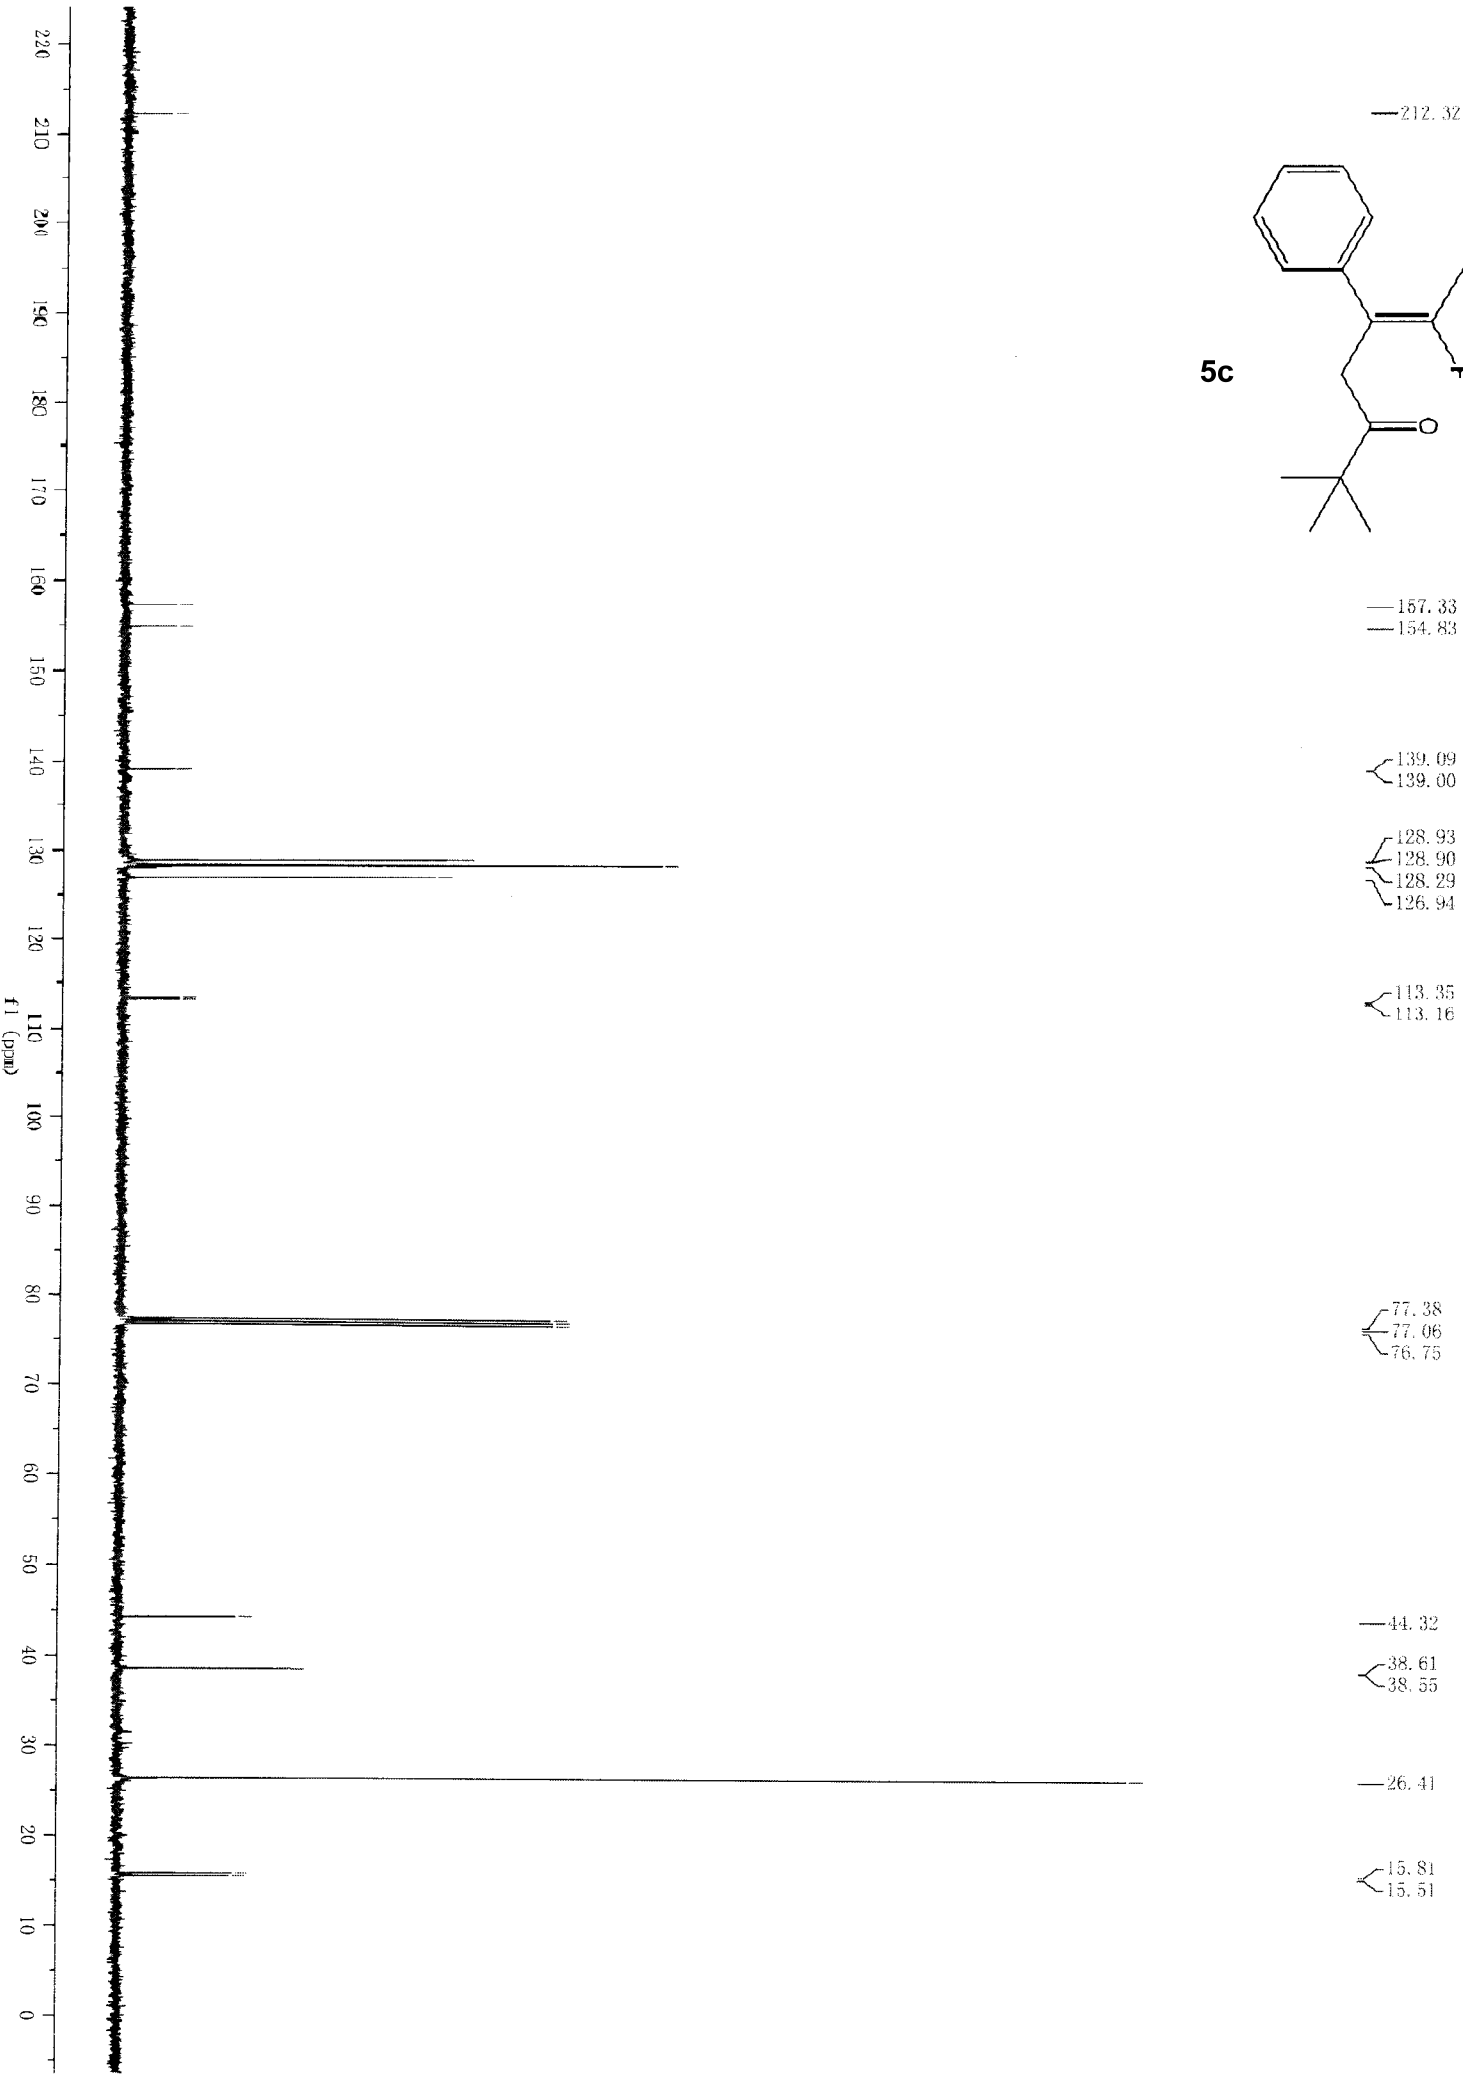

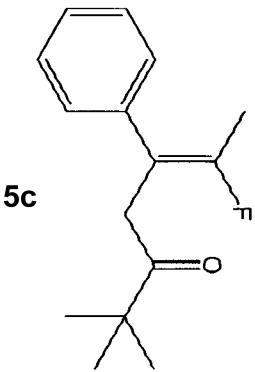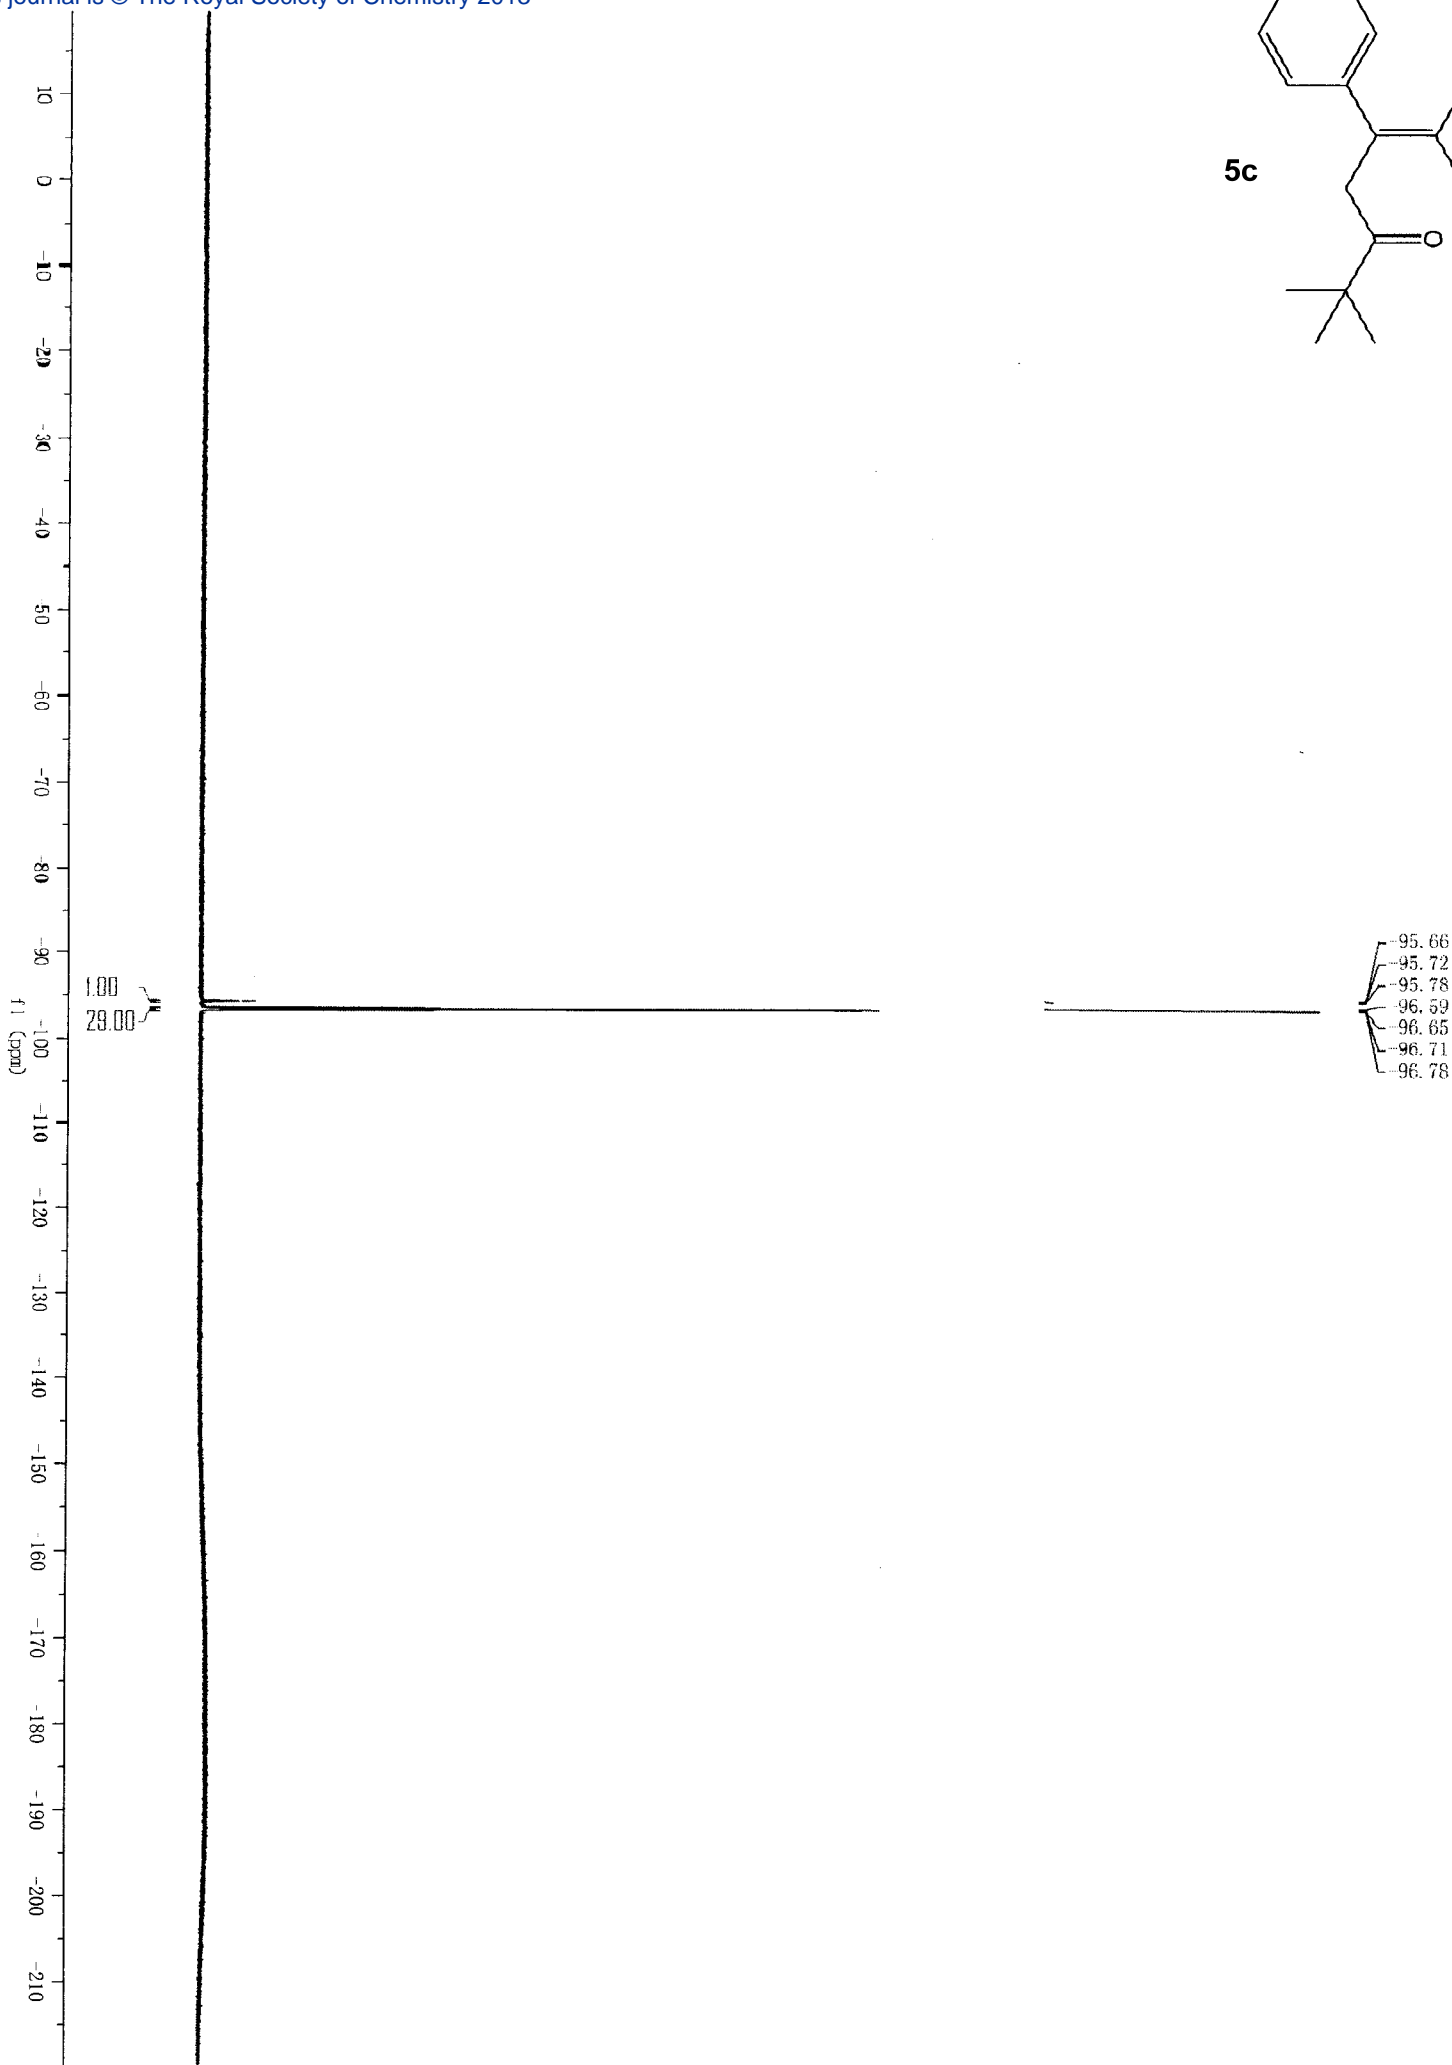

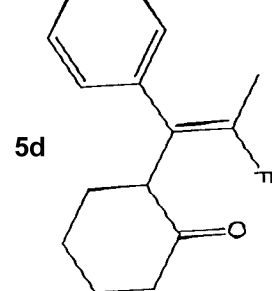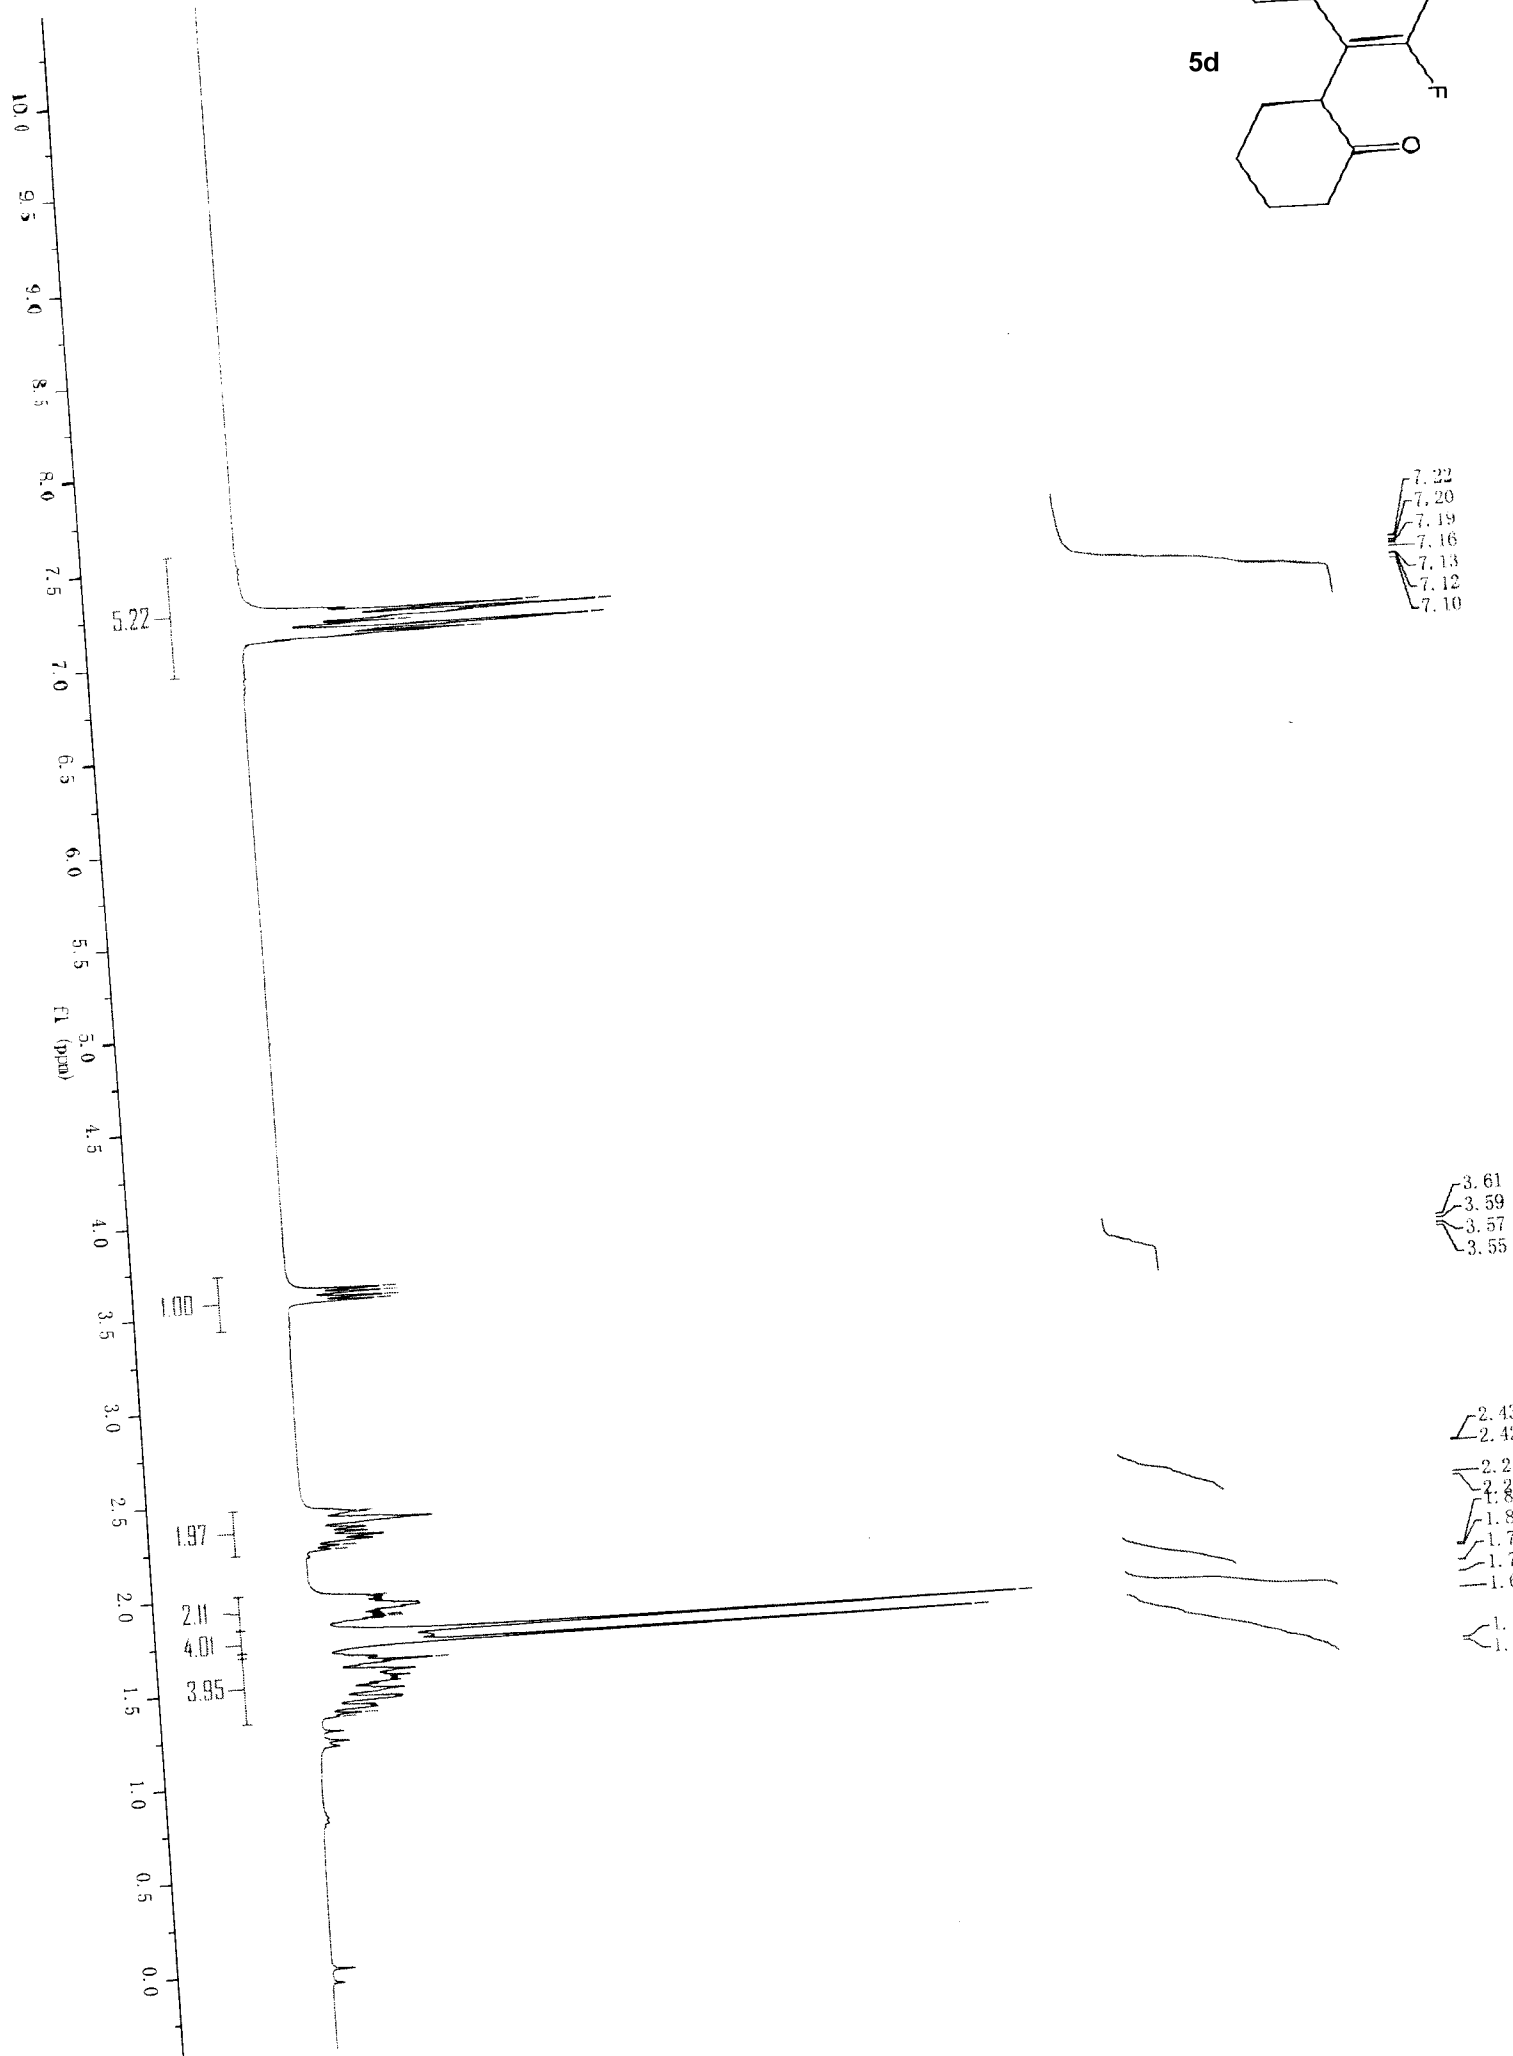

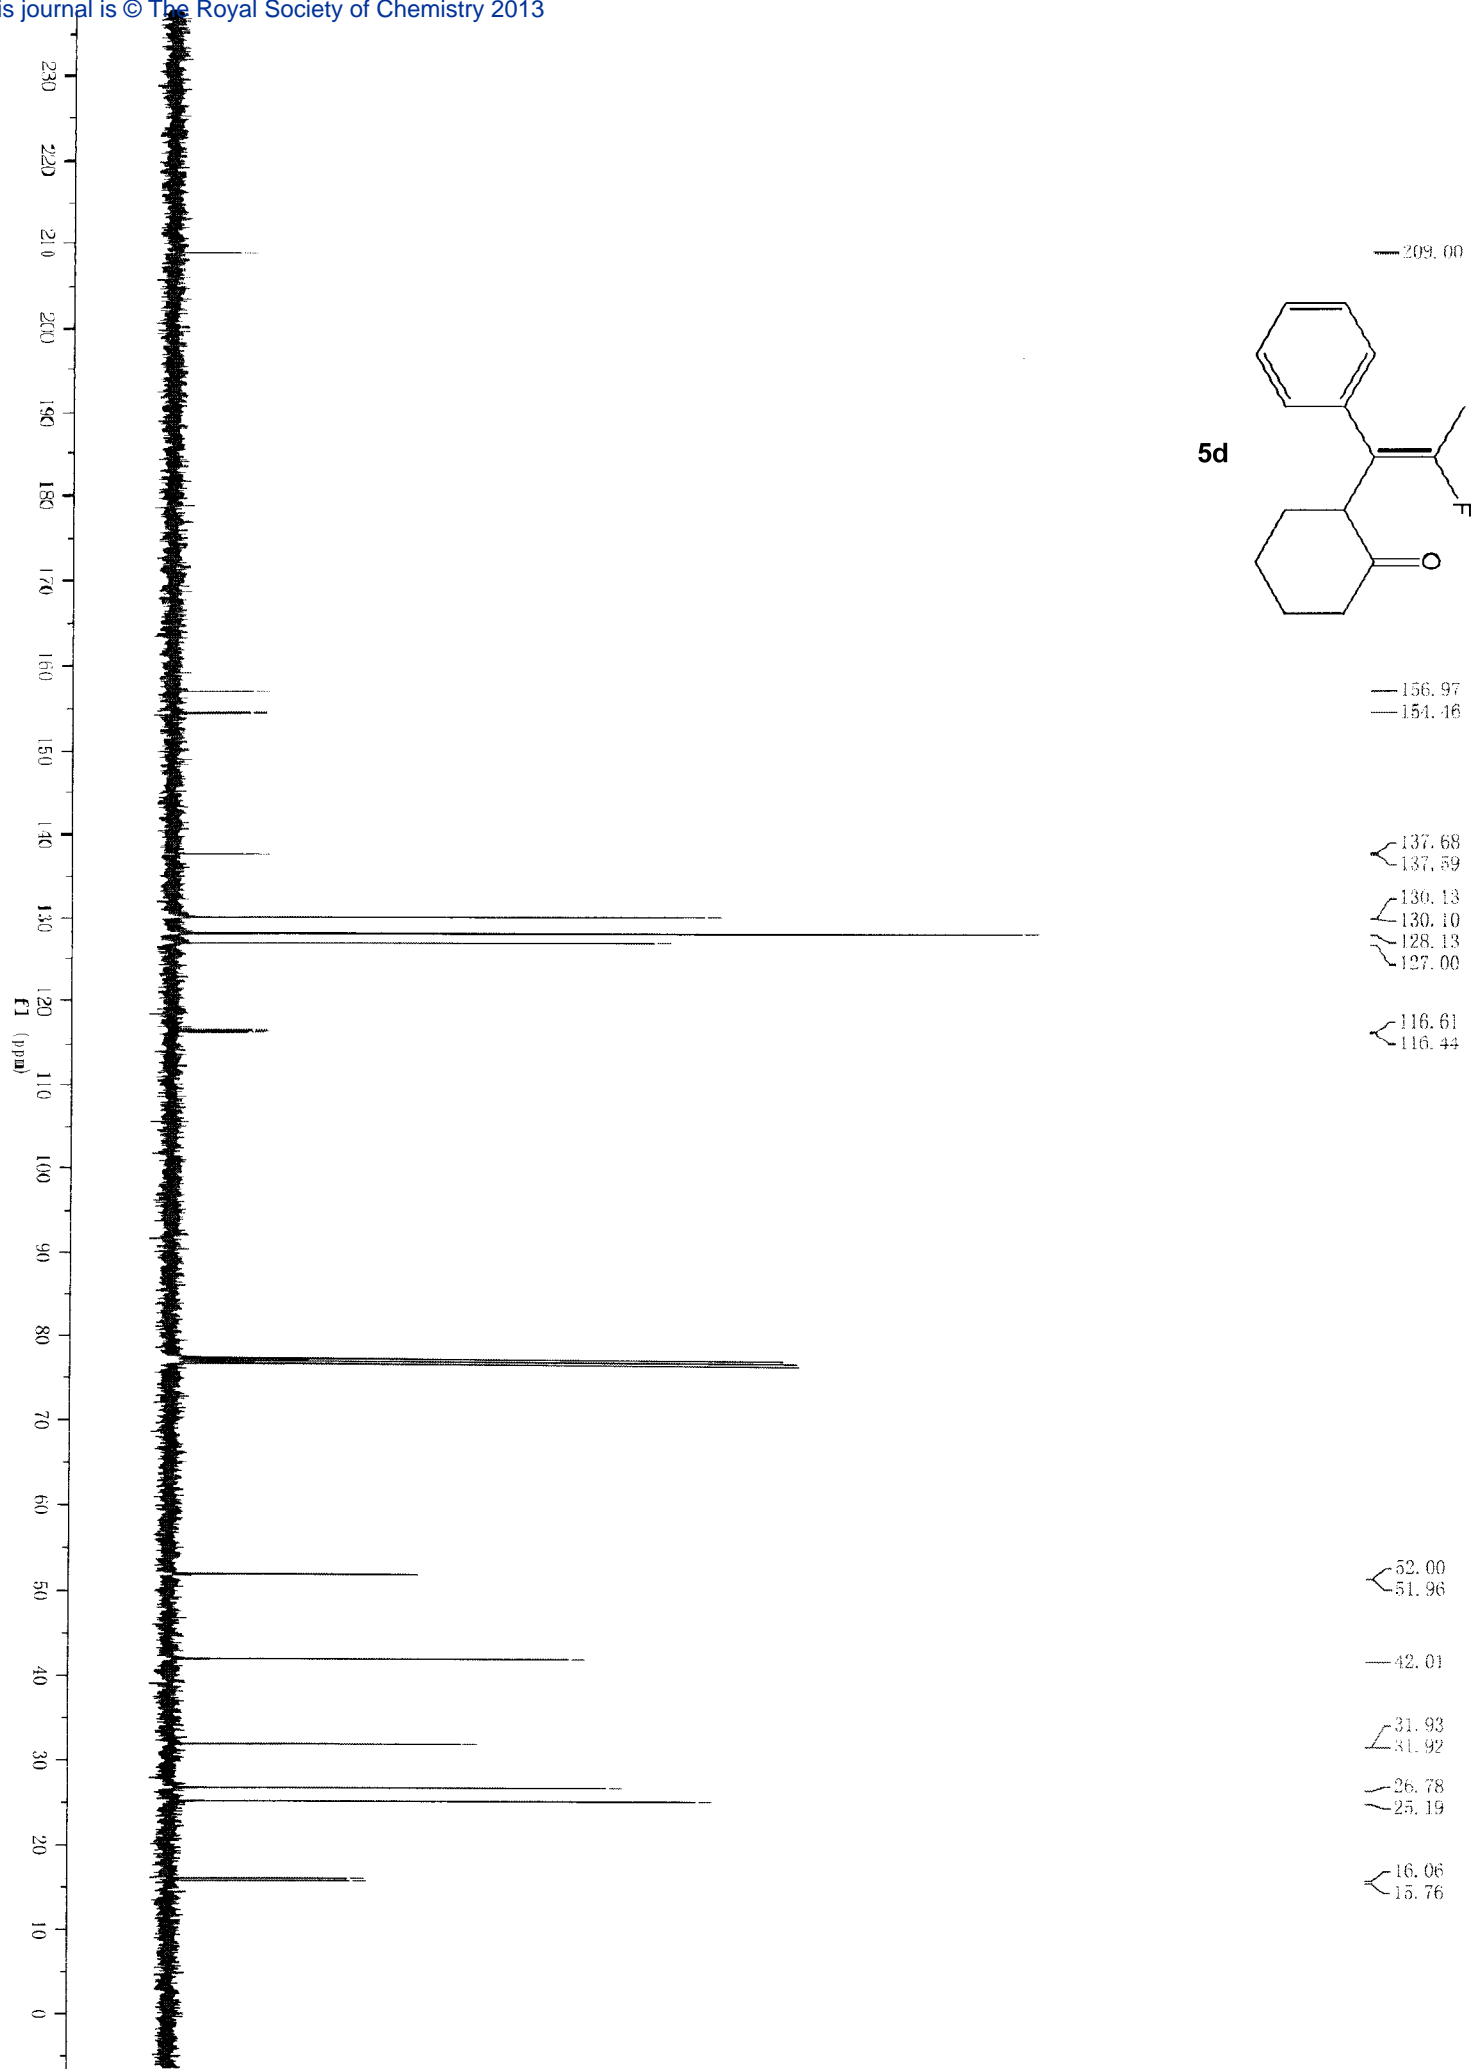

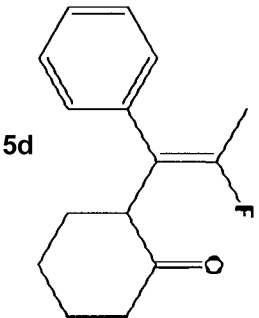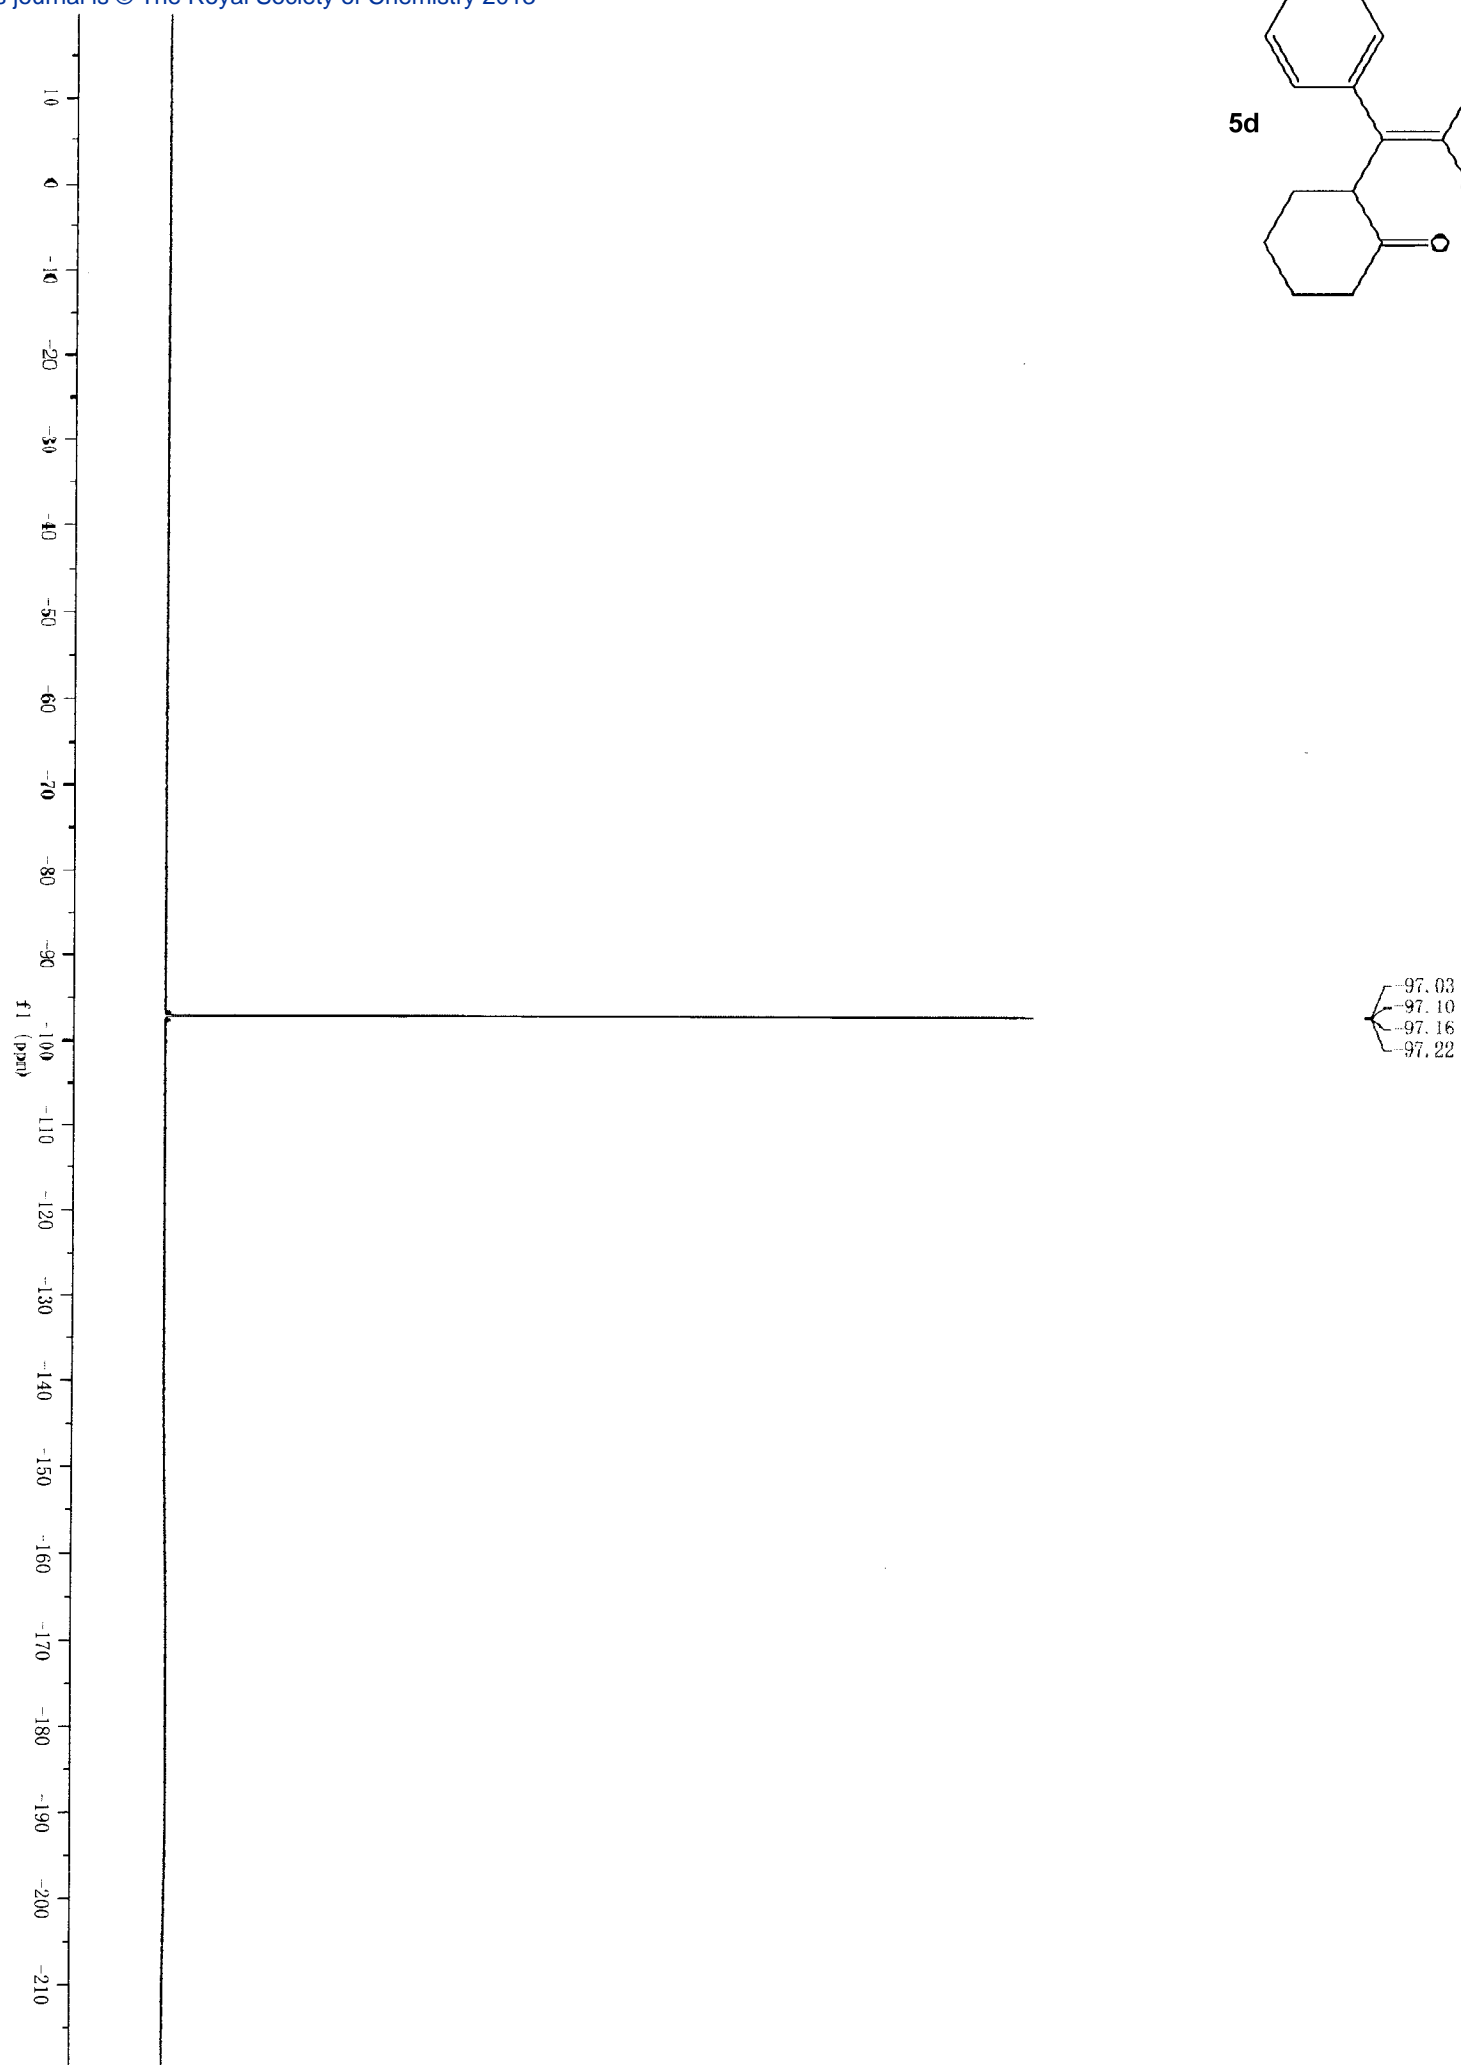

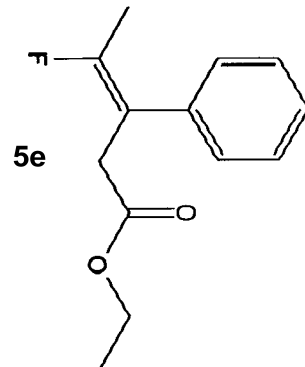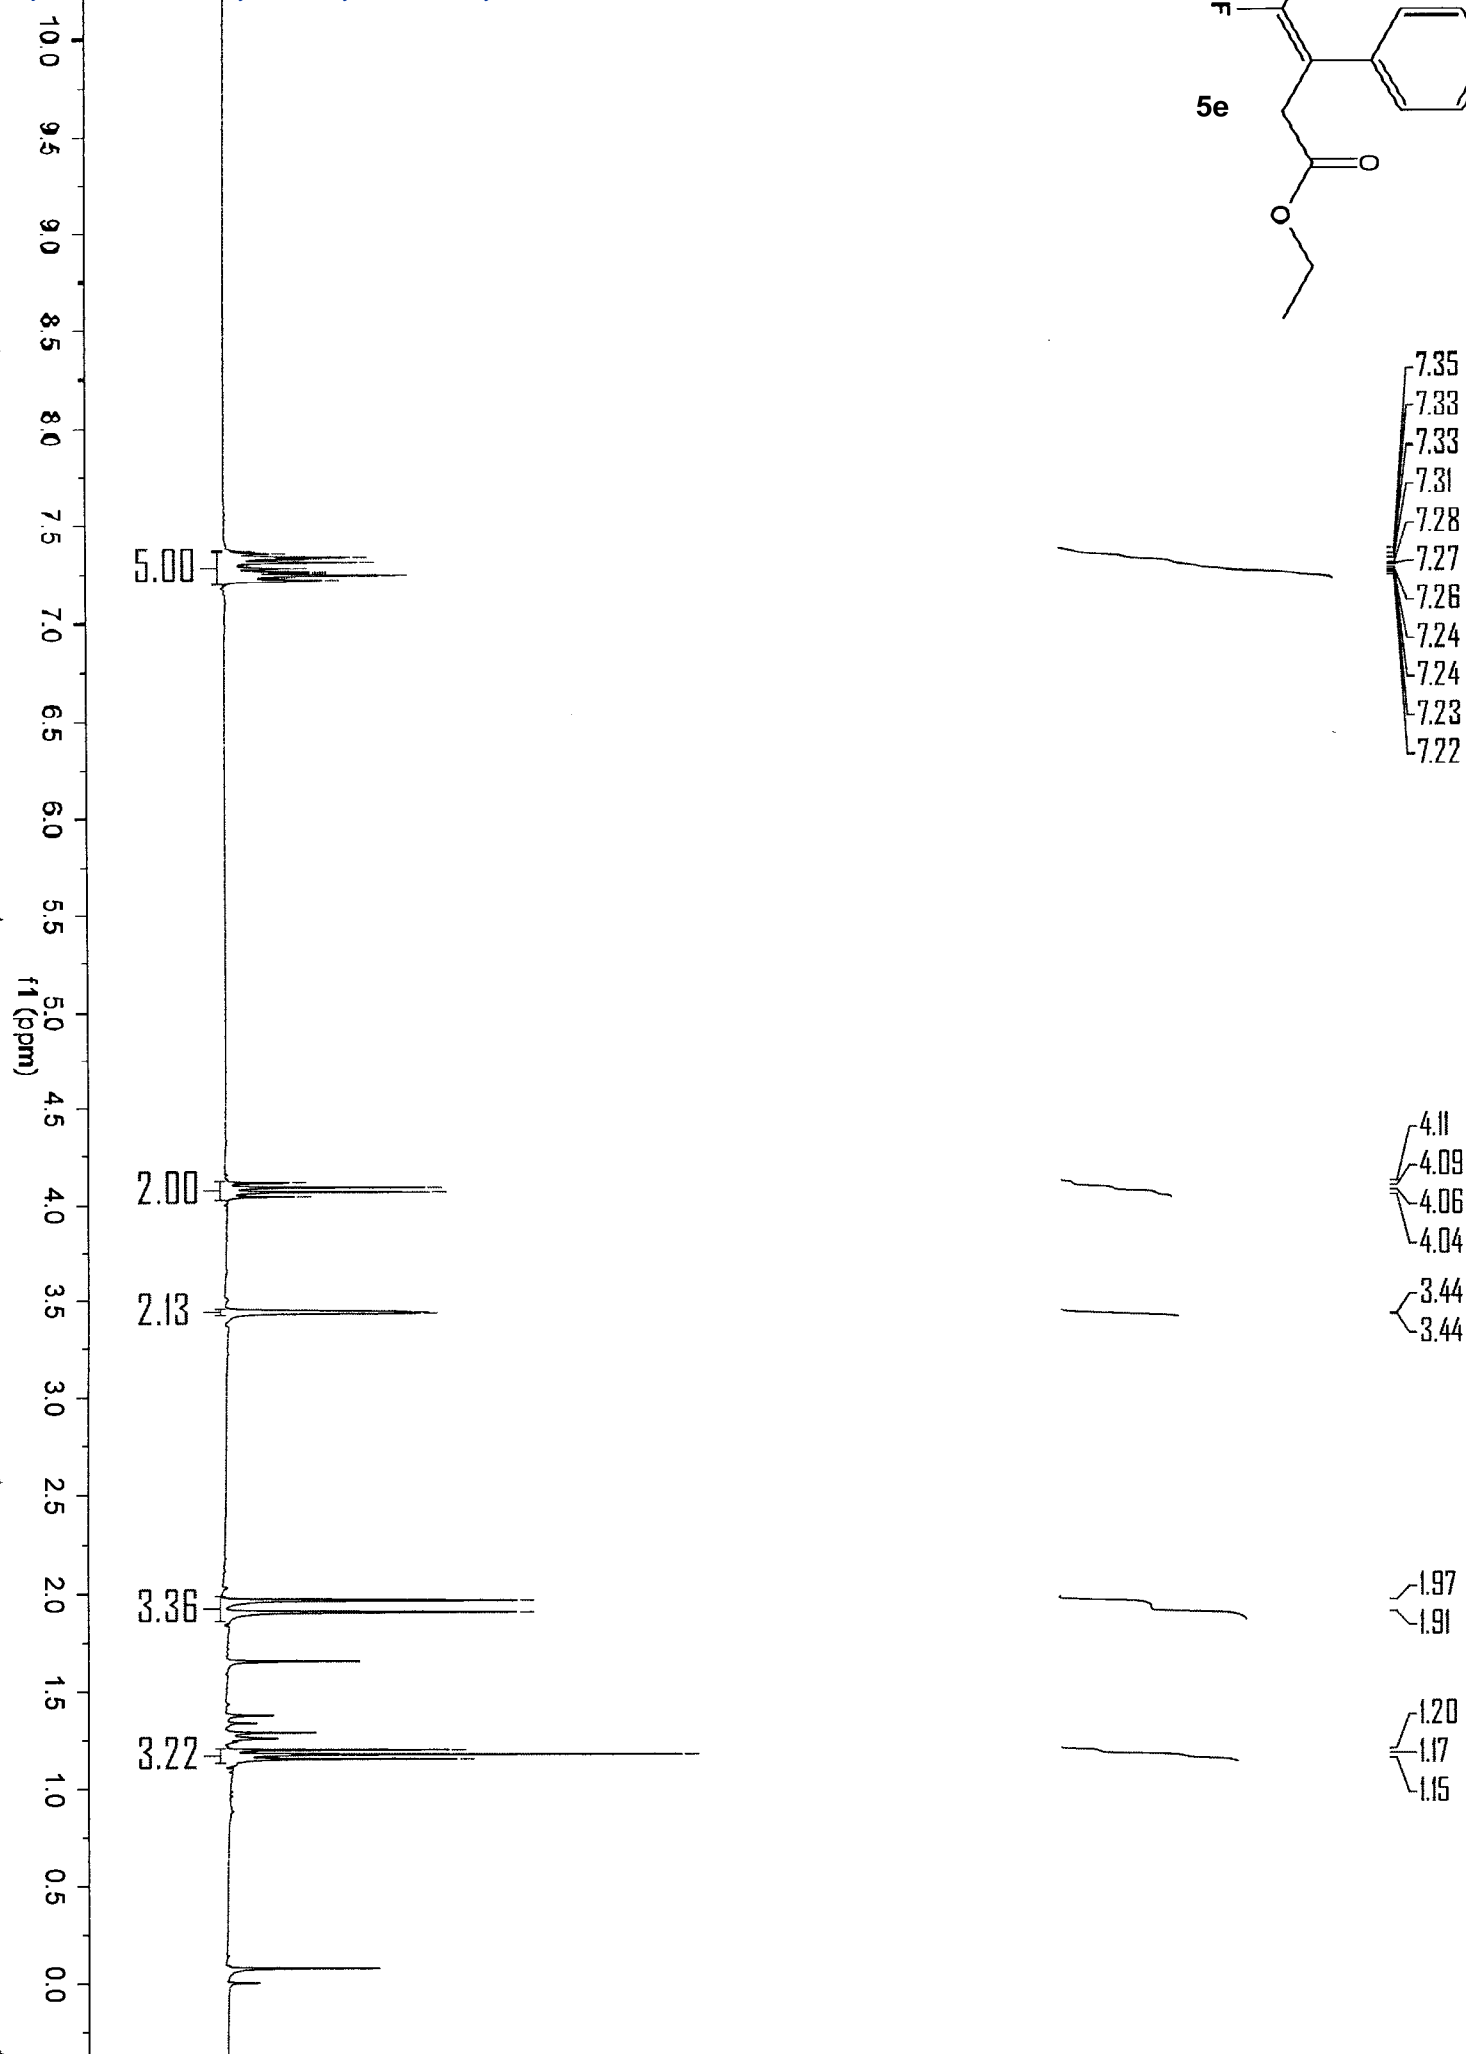

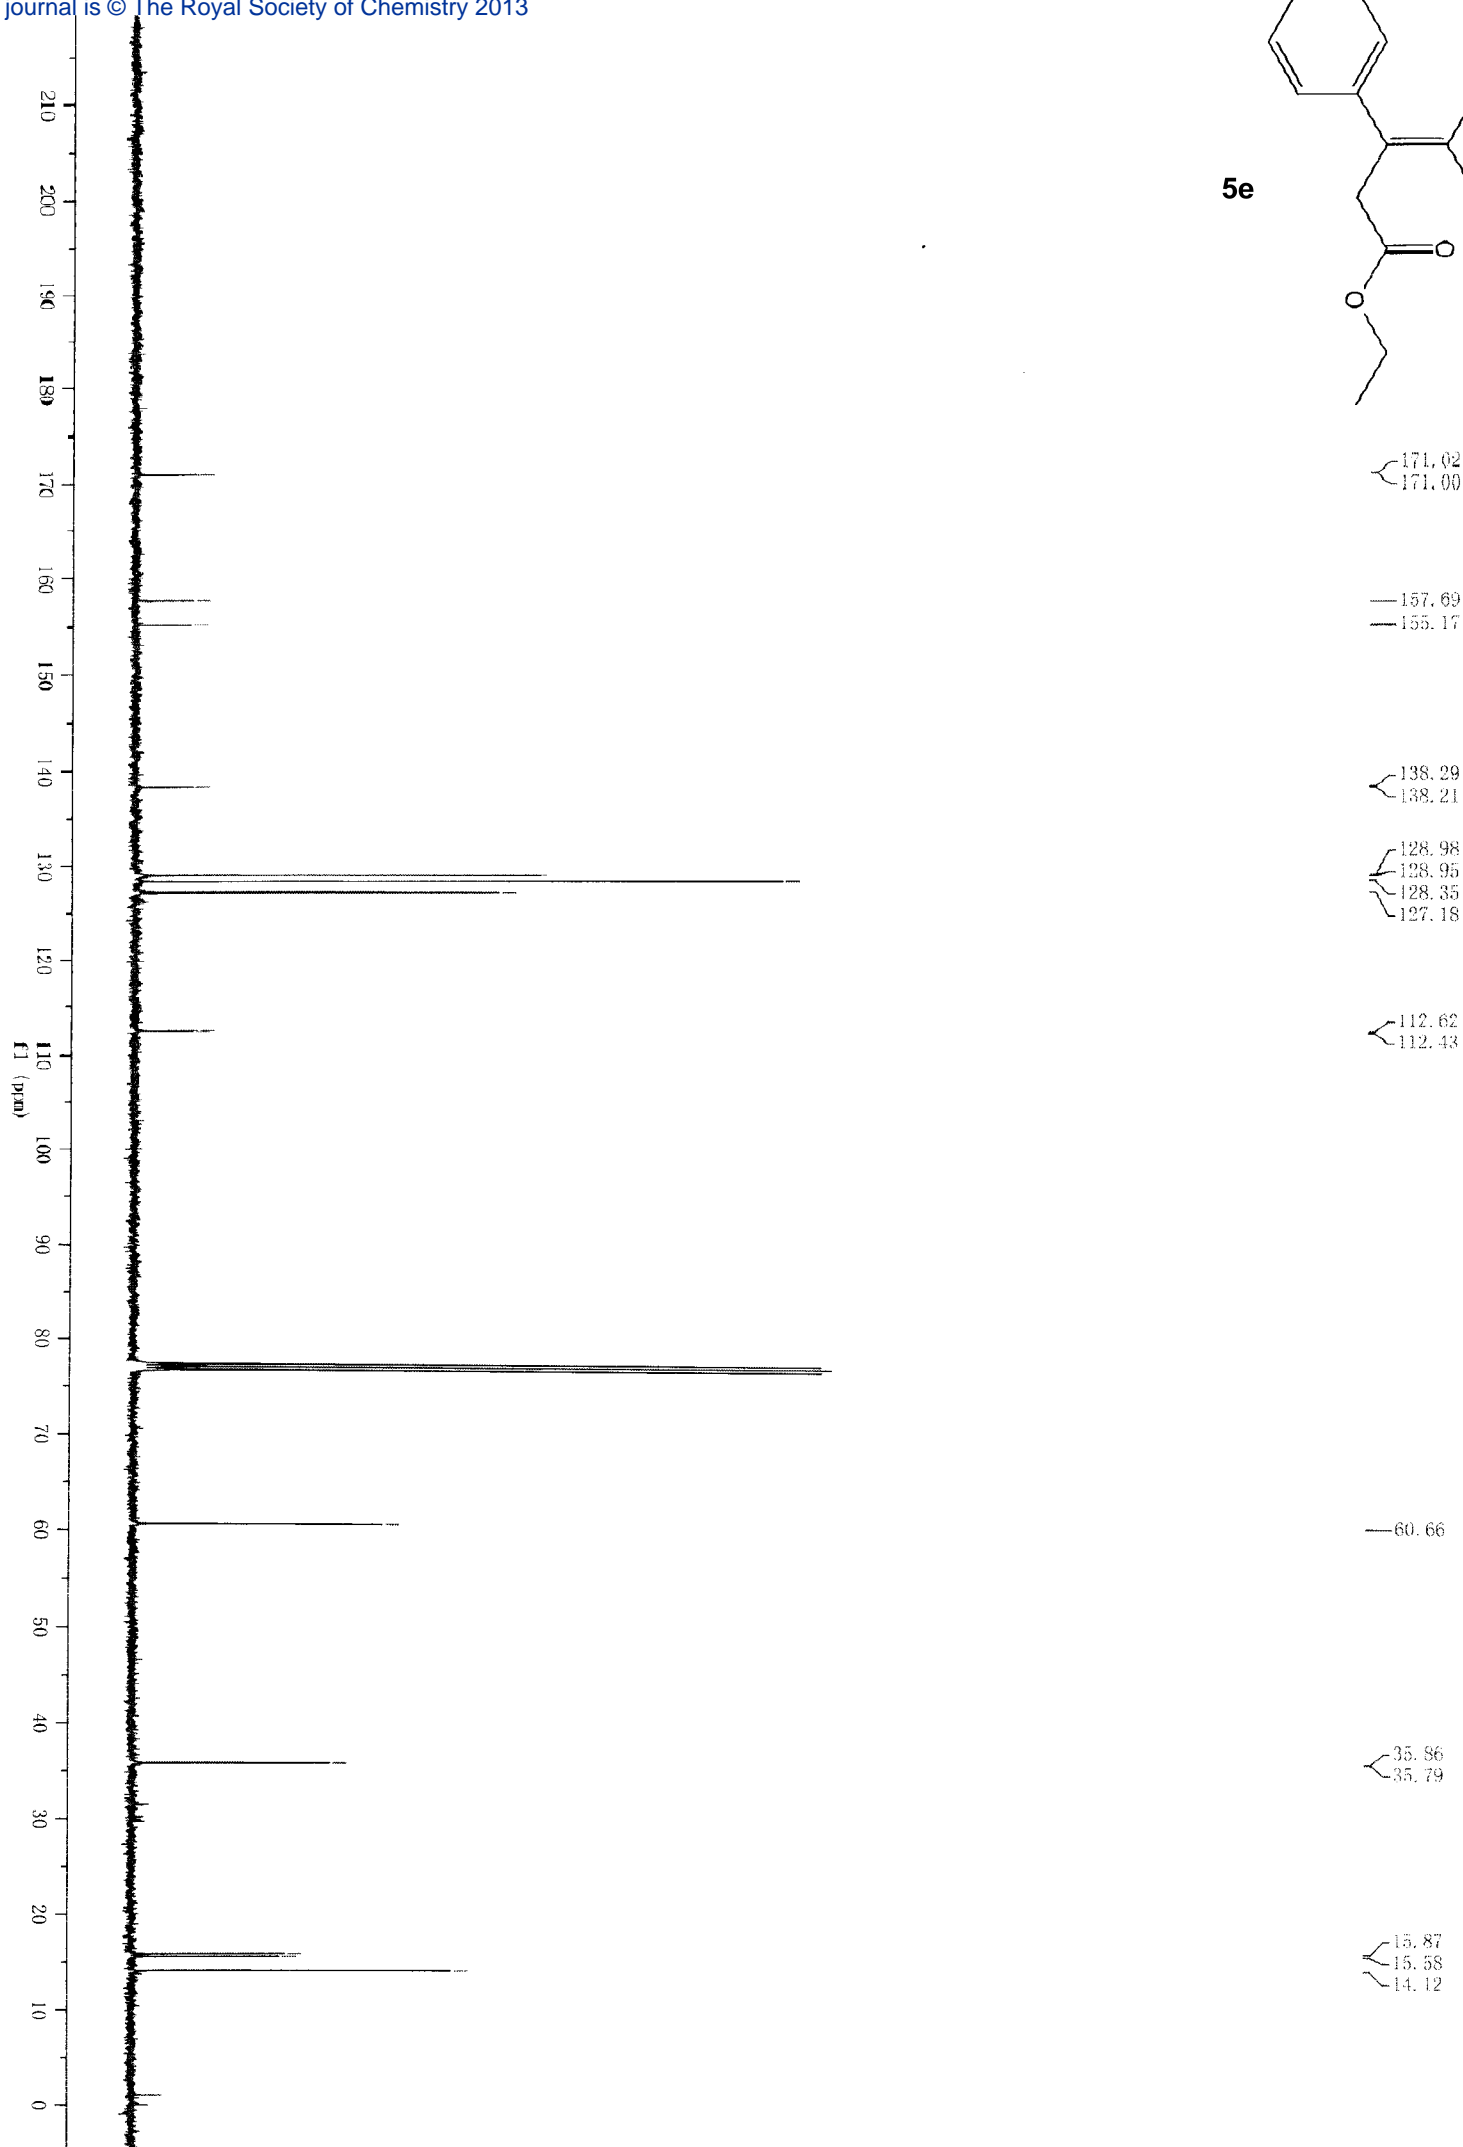

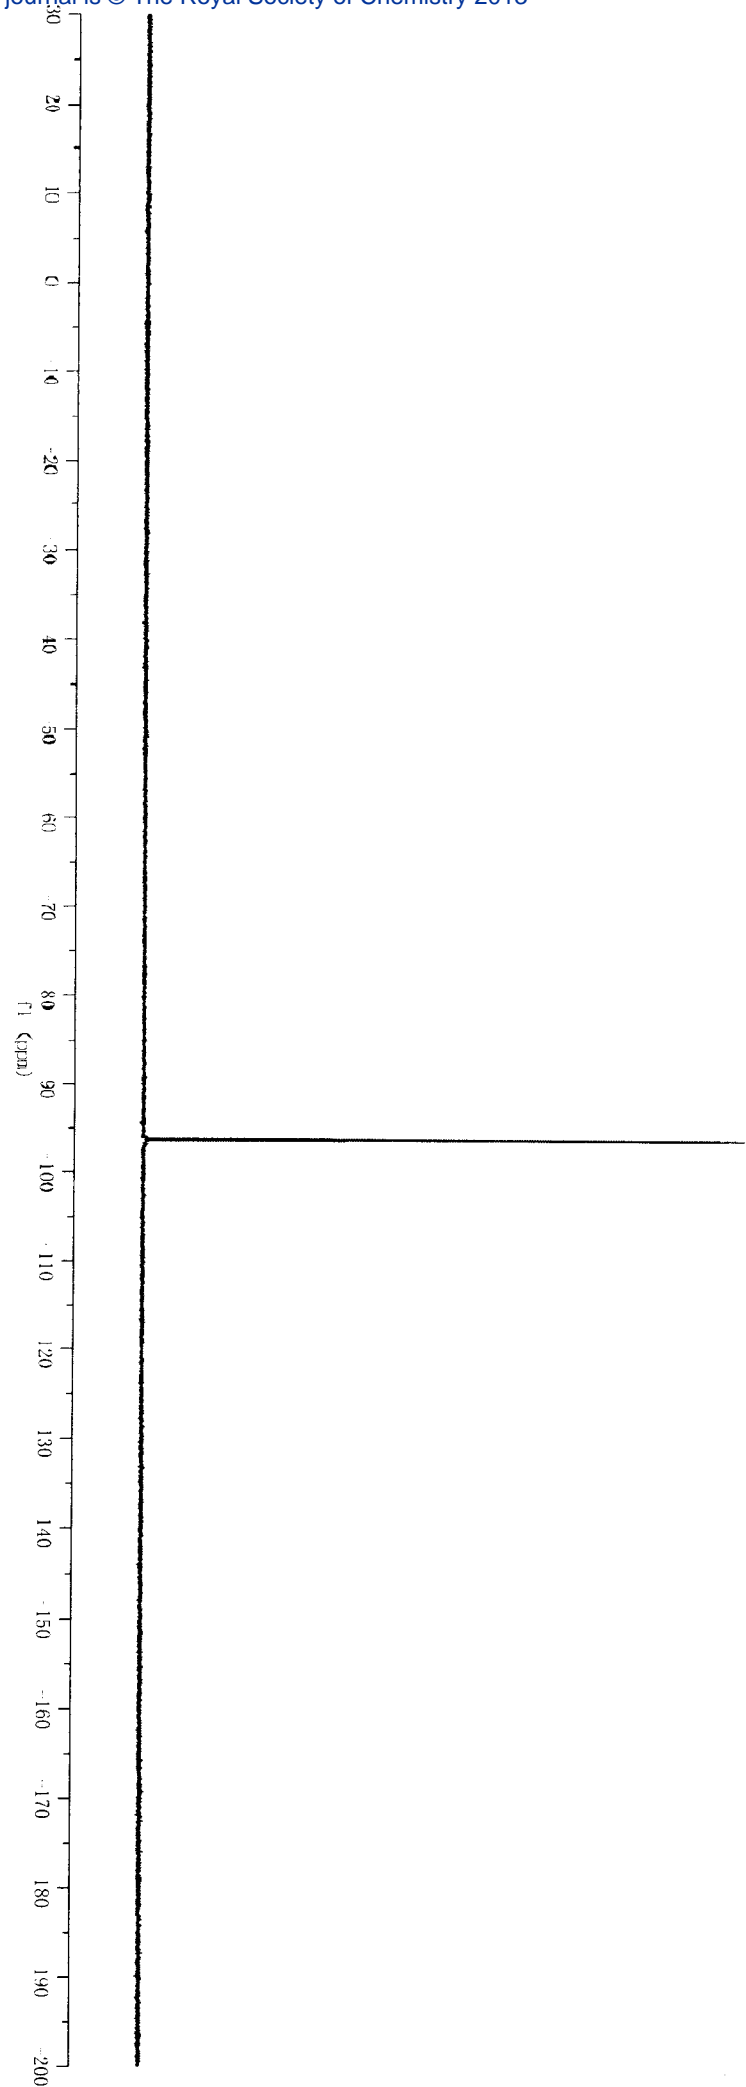

5e

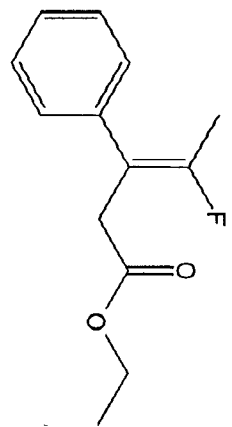

96.20  
96.26  
96.32  
96.39

SPYA 1F



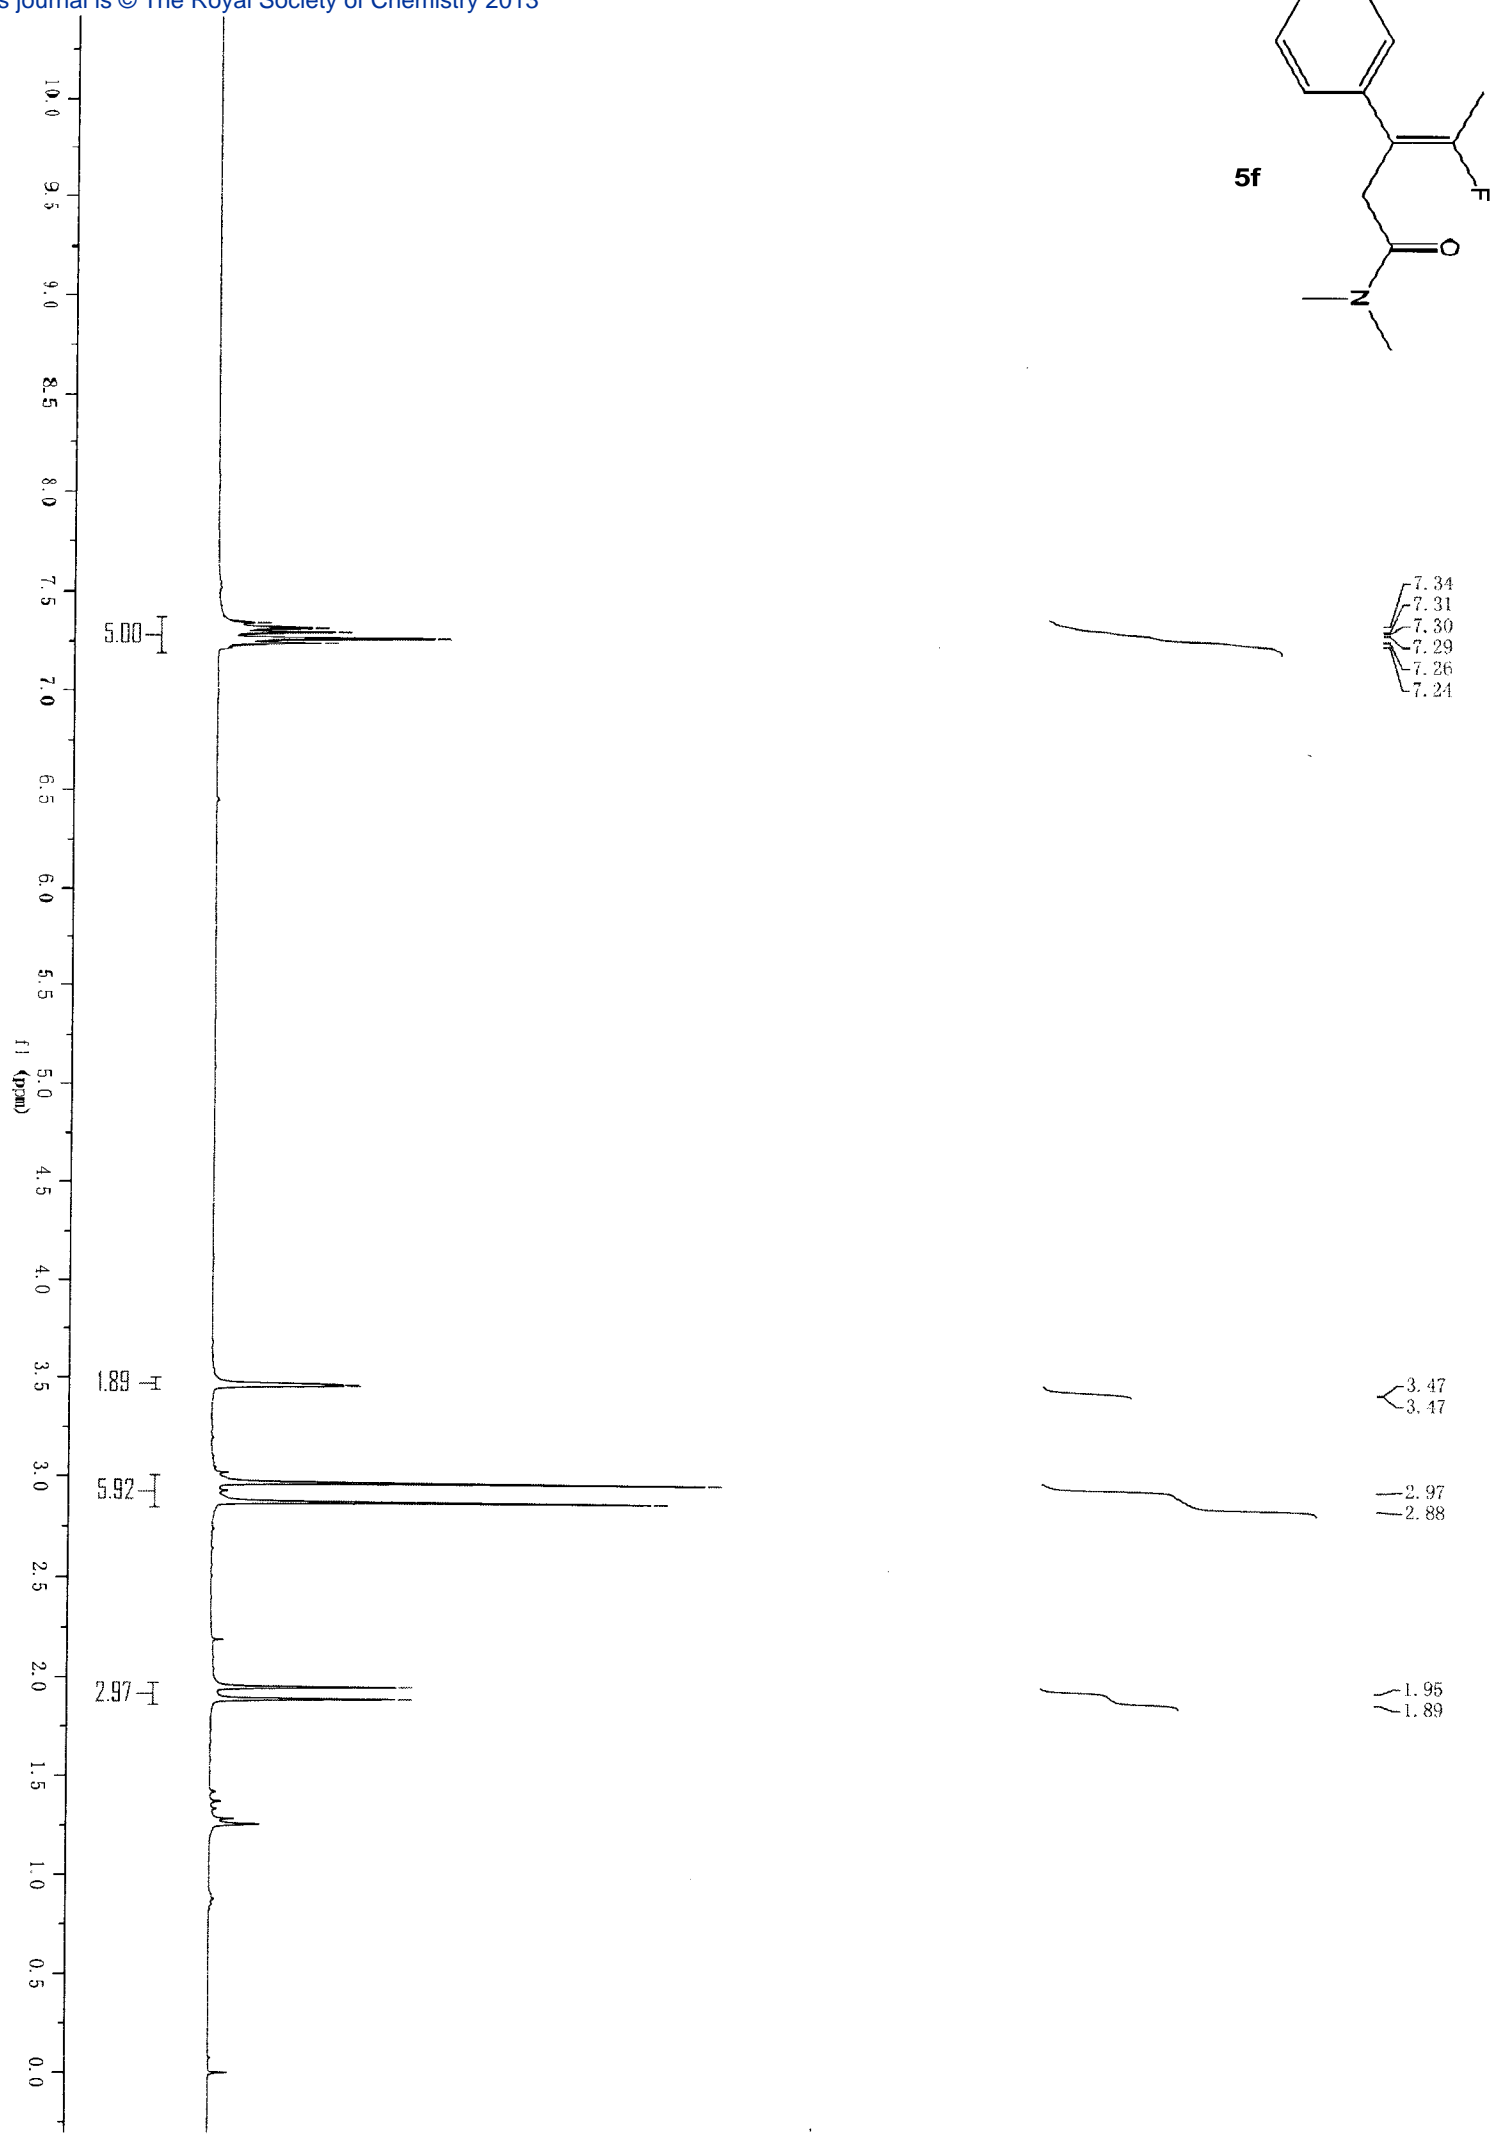

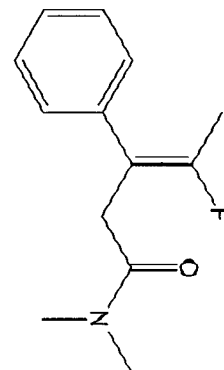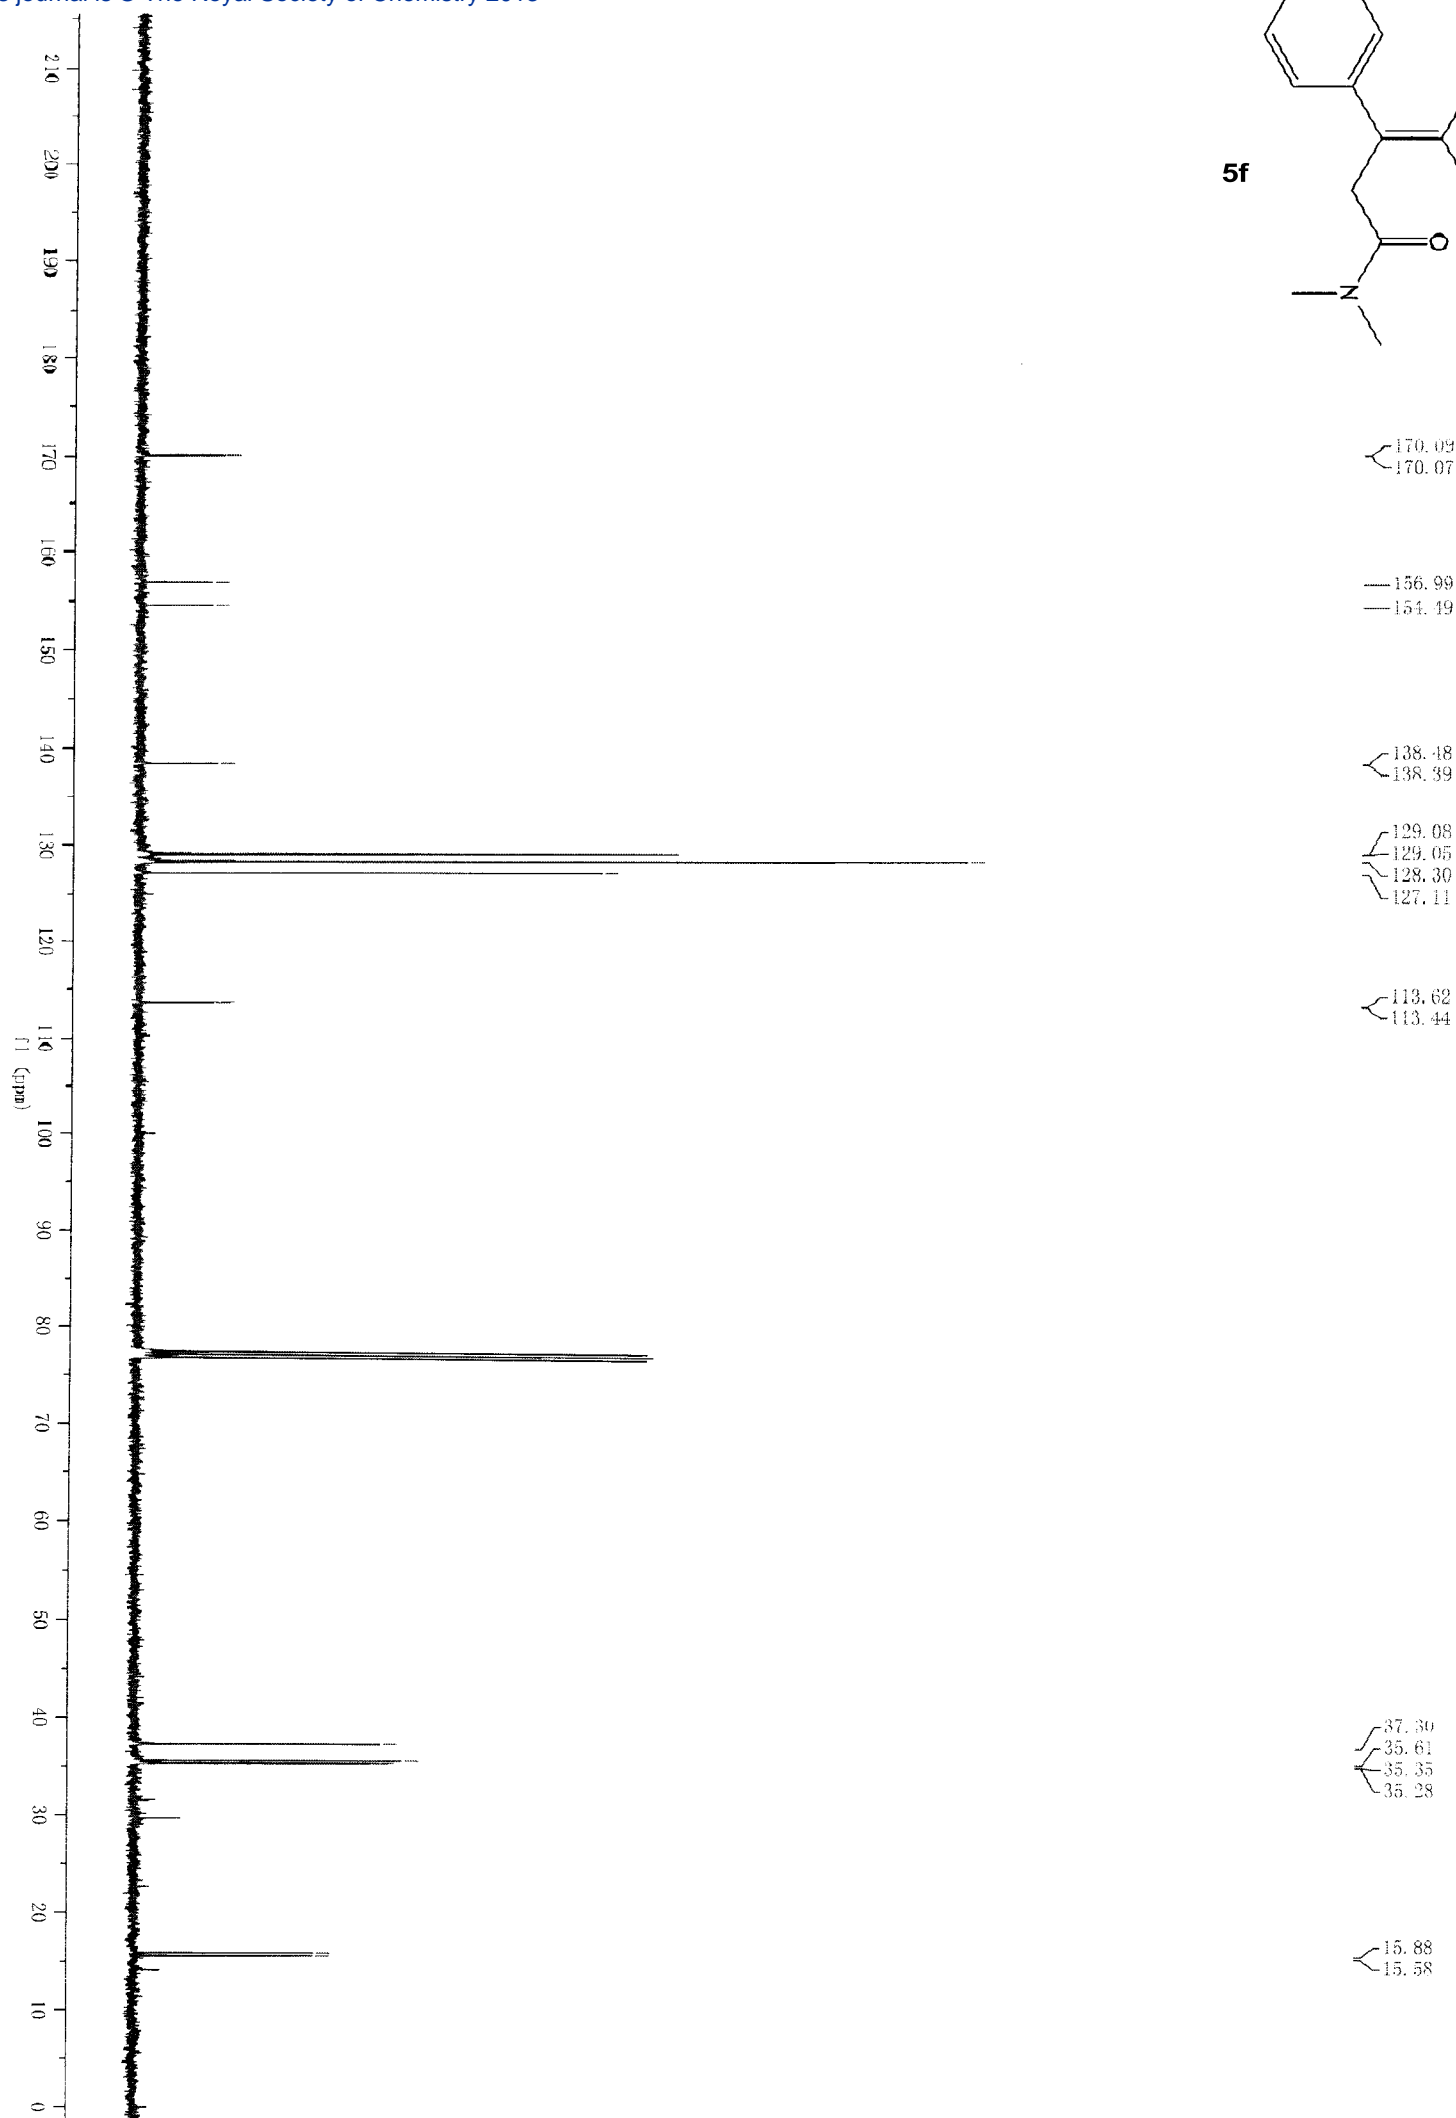

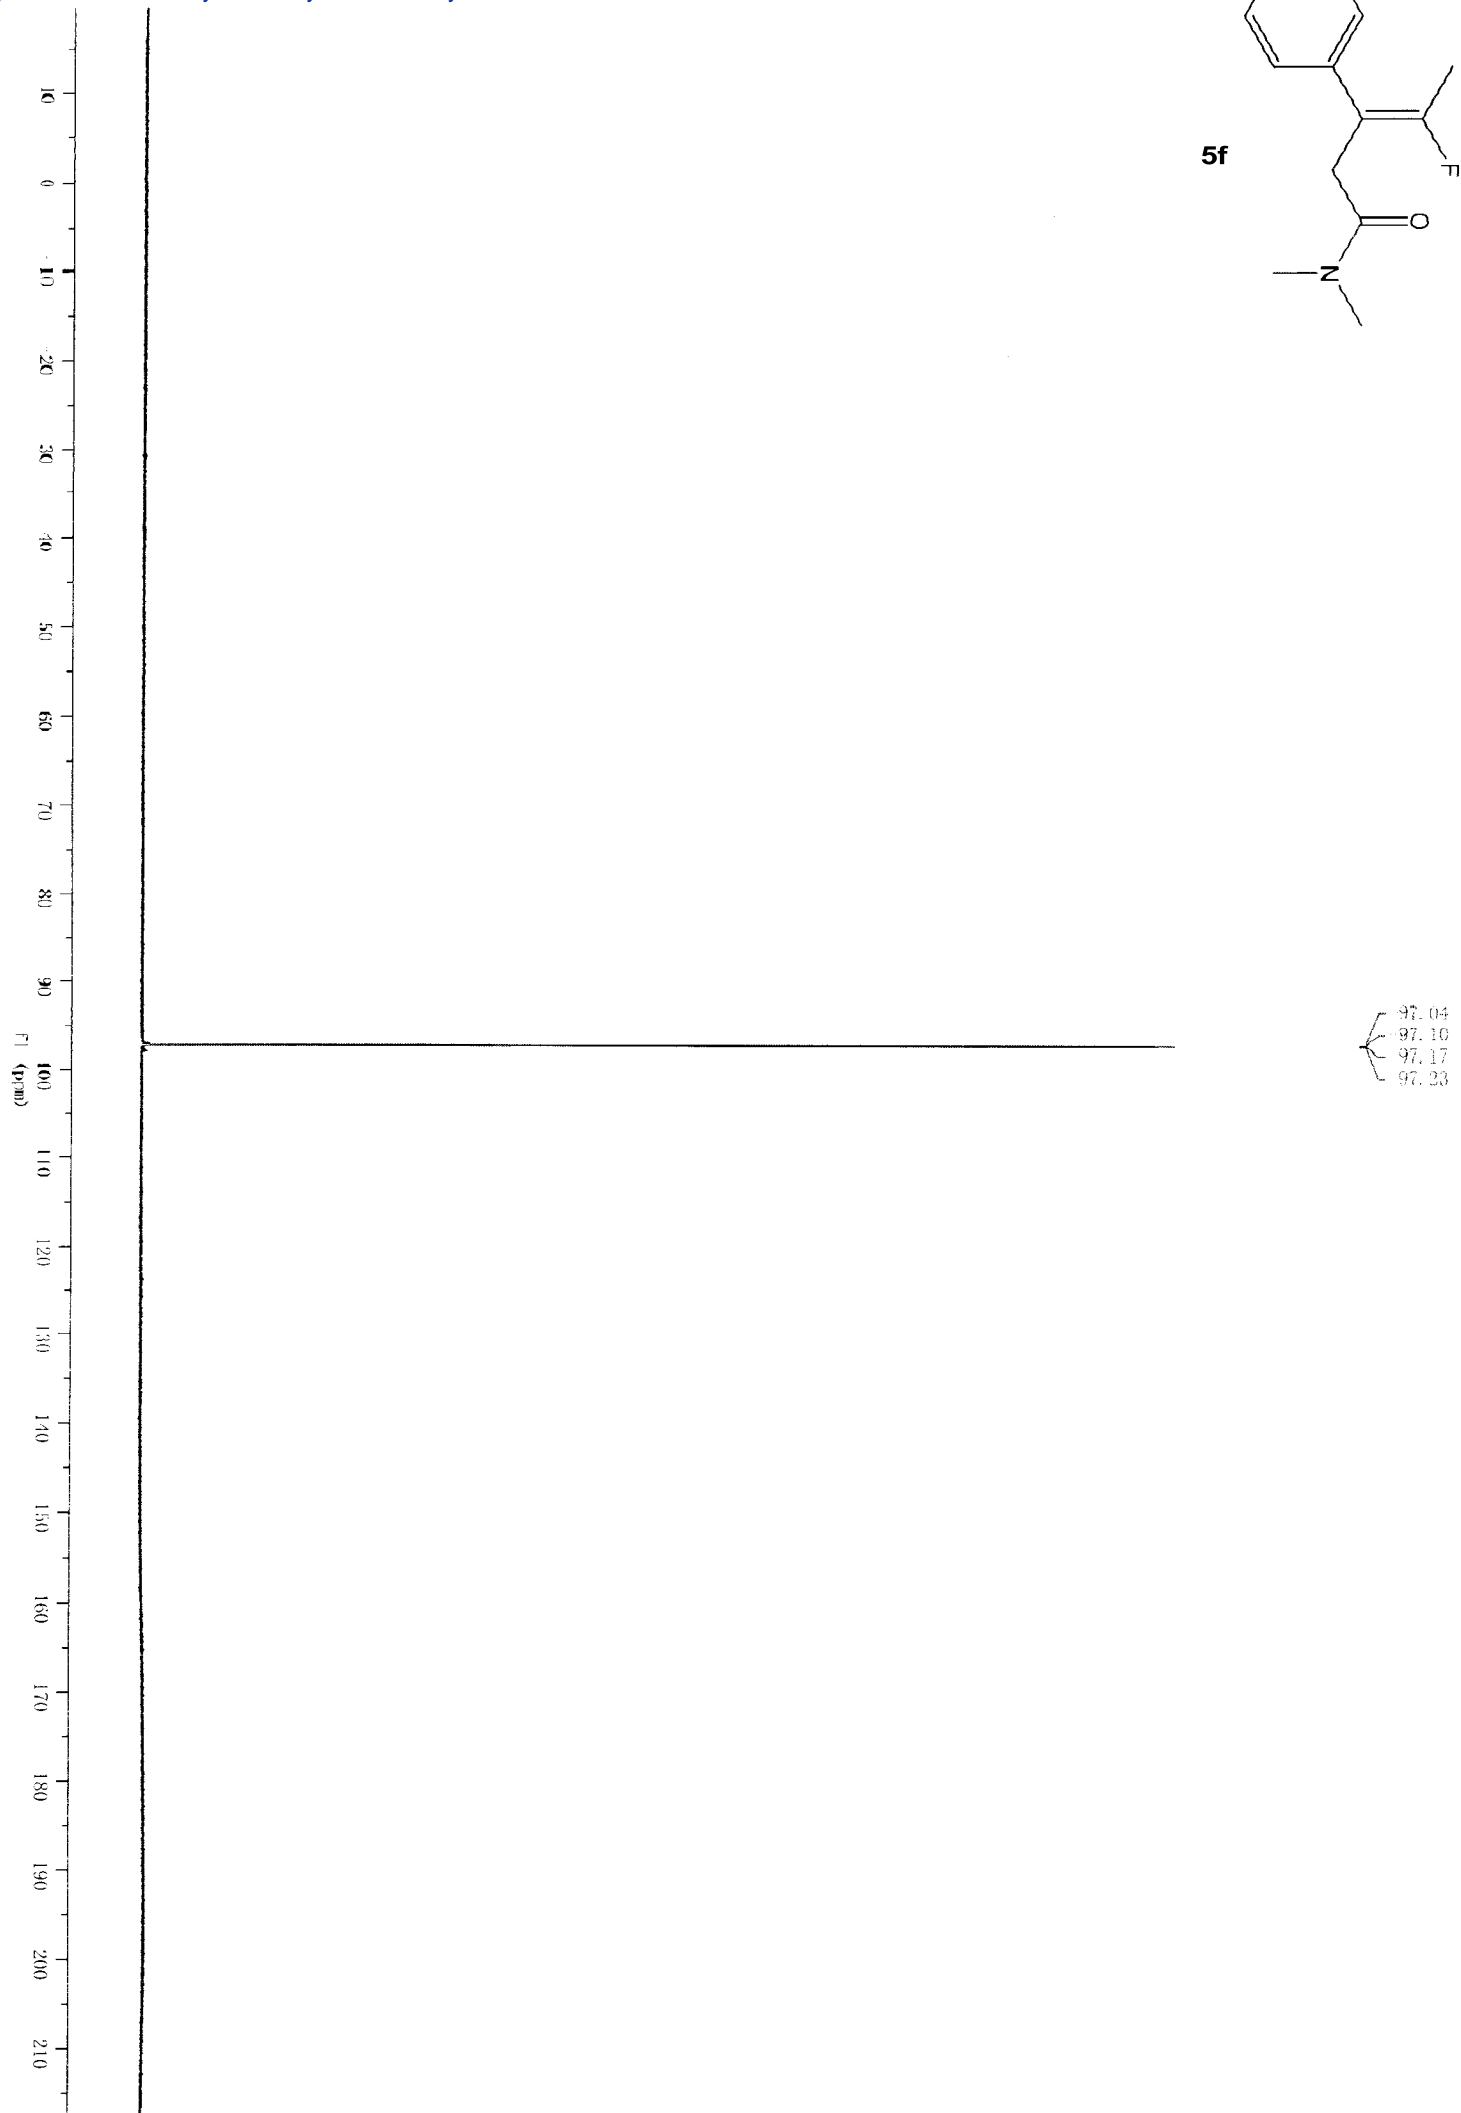

20081701866

Sample Name:  
20081701866  
Data Collected on:  
Agilent-NMR-vnmr400  
Archive directory:  
/home/sioc/date  
Sample directory:  
20081701866\_20130927\_01  
Fidfile: NOESY\_01

Pulse Sequence: NOESY  
Solvent: cdcl3  
Data collected on: Sep 27 2013

Temp: 25.0 C / 298.1 K  
Operator: sioc

Relax. delay 1.000 sec  
Acq. time 0.150 sec  
Width 3882.0 Hz  
2D Width 3882.0 Hz  
8 repetitions  
2 x 256 increments  
OBSERVE H1, 393.6568435 MHz  
DATA PROCESSING  
Gauss apodization 0.069 sec  
F1 DATA PROCESSING  
Gauss apodization 0.037 sec  
F1 size 2048 x 2048  
Total time 2 hr, 9 min

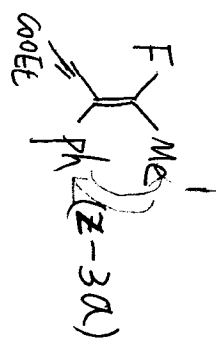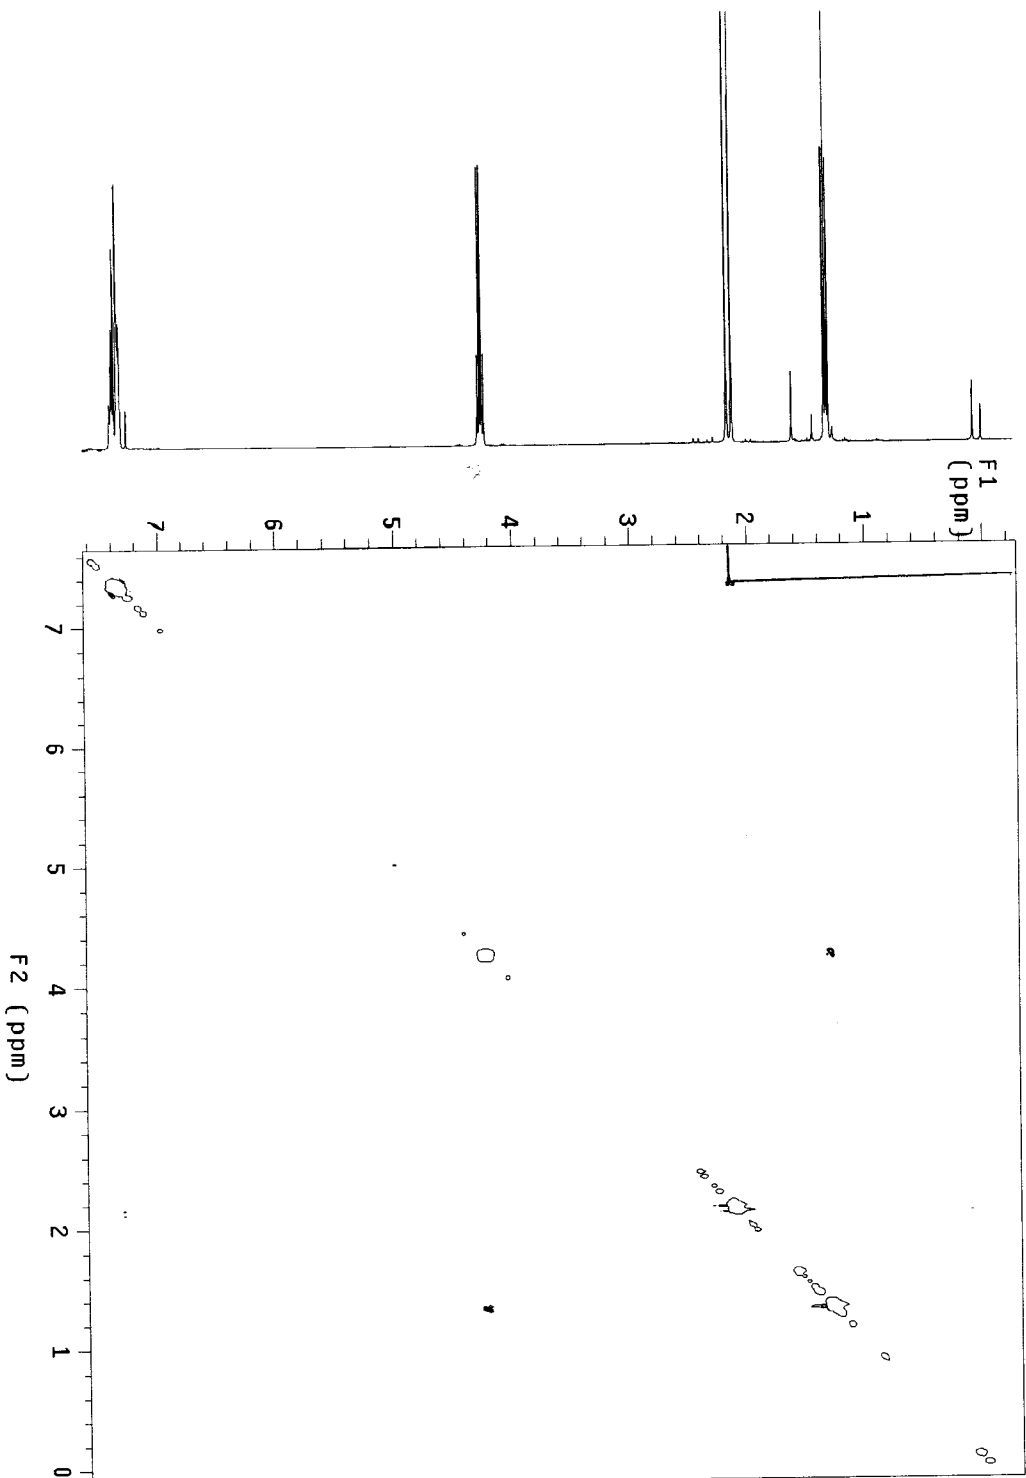

5f

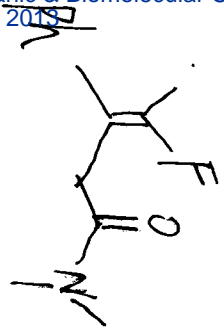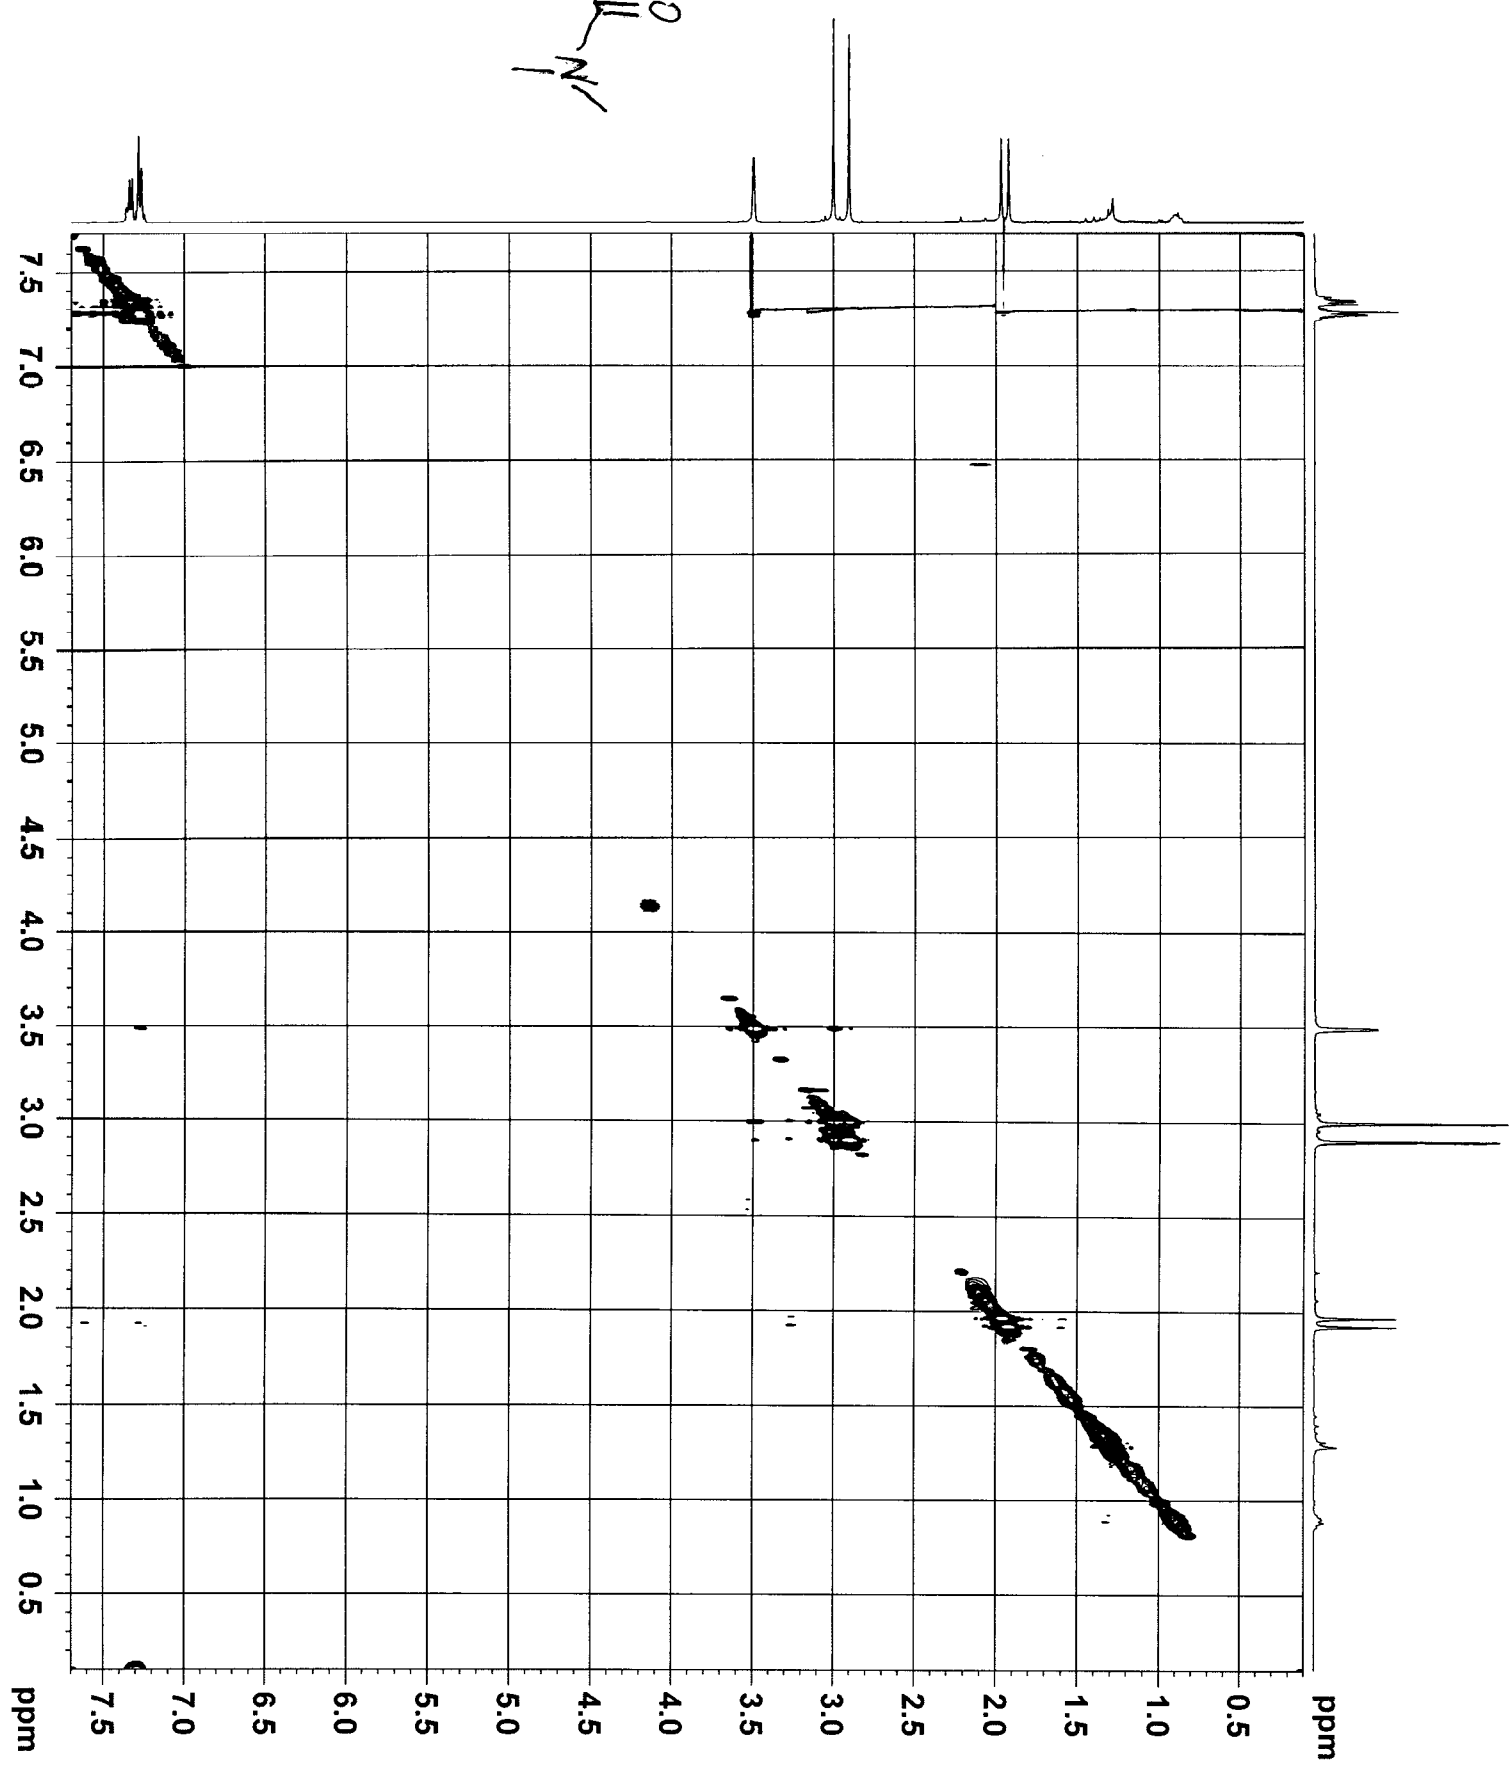

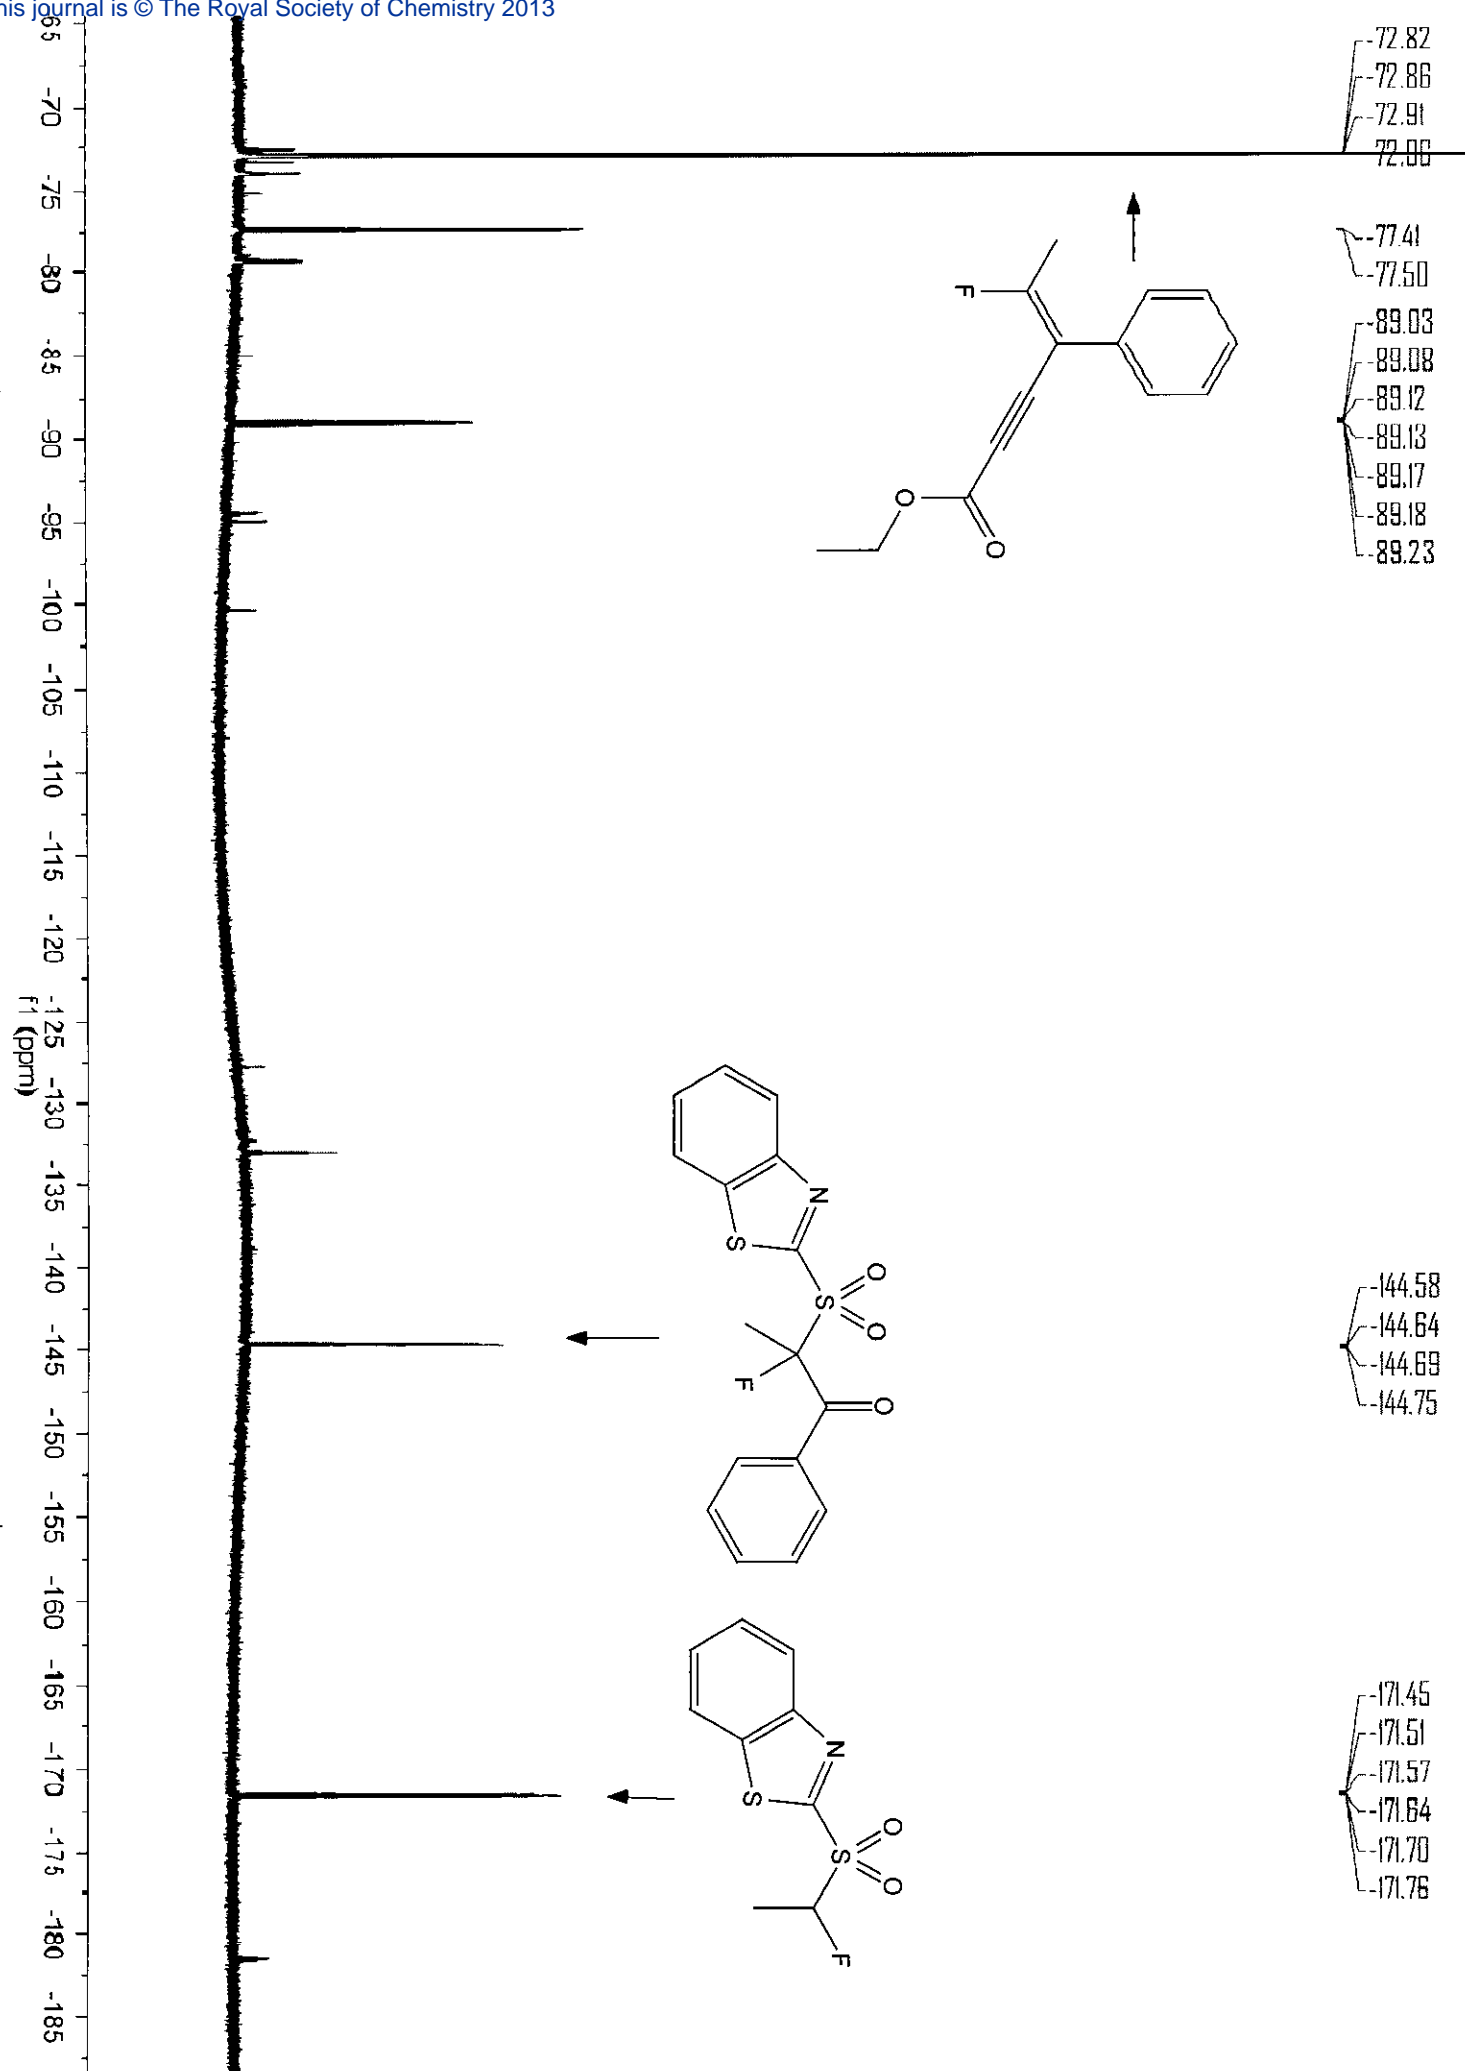

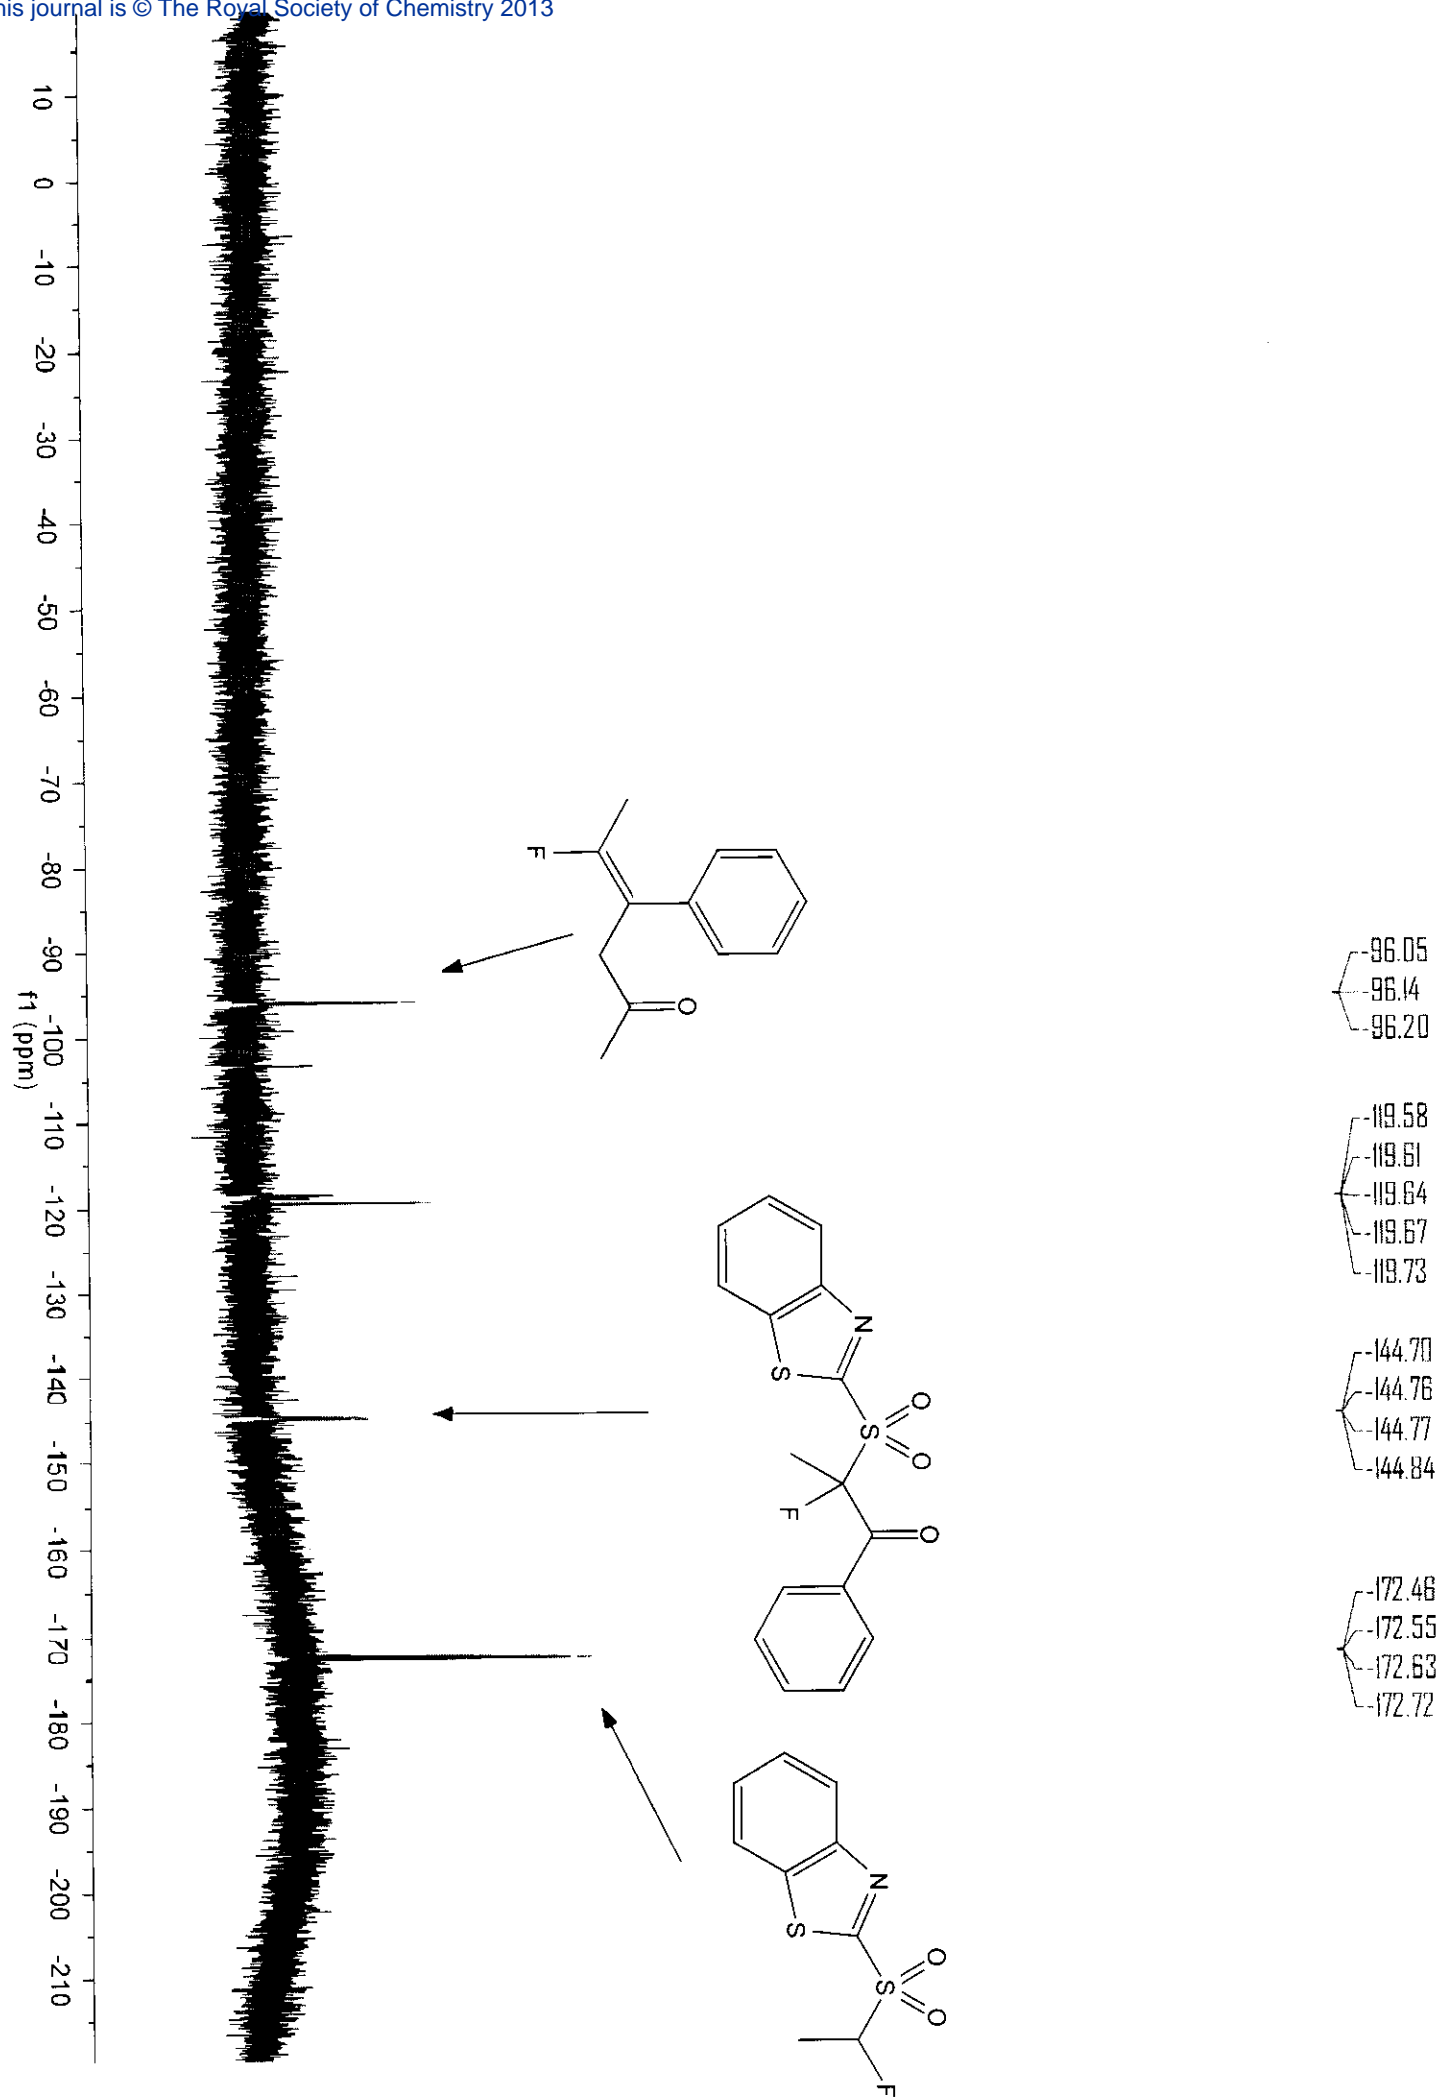

Supplement: c3ob42093k.pdf [file c3ob42093k.pdf]
